# Supplementary material for: Naphthalonitriles featuring efficient emission in solution and in the solid state
Source: publisher site journal article supplement (doi:10.3762/bjoc.16.246), 2020-12-02
Supplement: Additional file 1 [file 1860-5397-16-246-S1.pdf]

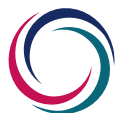

## Supporting Information

for

### **Naphthalonitriles featuring efficient emission in solution and in the solid state**

Sidharth Thulaseedharan Nair Sailaja, Iván Maisuls, Jutta Kösters, Alexander Hepp, Andreas Faust, Jens Voskuhl and Cristian A. Strassert

*Beilstein J. Org. Chem.* **2020**, *16*, 2960–2970. doi:10.3762/bjoc.16.246

### **Experimental procedures, NMR and EM-ESI-MS spectra**

## Content

|                                                                                                                                 |            |
|---------------------------------------------------------------------------------------------------------------------------------|------------|
| <b>Section S1: Materials and methods</b>                                                                                        | <b>S2</b>  |
| <b>Section S2: Synthesis and characterization of <i>p</i>-phenyl substituted 2,3-dicyano-6,7-diphenylnaphthalenes</b>           | <b>S4</b>  |
| <b>Section S3: NMR spectra of H, Me, <i>t</i>-Bu, OMe, SMe &amp; NMe<sub>2</sub></b>                                            | <b>S8</b>  |
| <b>Section S4: Mass spectra of H, Me, <i>t</i>-Bu, OMe, SMe &amp; NMe<sub>2</sub></b>                                           | <b>S20</b> |
| <b>Section S5: Single crystal X-ray diffraction analysis of Me</b>                                                              | <b>S22</b> |
| <b>Section S6: Photophysical characterization of H, Me, <i>t</i>-Bu, OMe, SMe &amp; NMe<sub>2</sub> and aggregation studies</b> | <b>S25</b> |
| <b>Section S7: Dynamic light scattering measurements</b>                                                                        | <b>S47</b> |
| <b>Section S8: Aggregation studies</b>                                                                                          | <b>S55</b> |
| <b>Section S9: References</b>                                                                                                   | <b>S56</b> |

## Section S1: Materials and methods

Chemicals were purchased from Sigma Aldrich or from TCI Chemicals and used without further purification. Reactions were carried out using dried solvents and under an atmosphere of argon. Reactions were monitored by thin-layer chromatography (TLC), which was performed on 0.2 mm Macherey-Nagel ALUGRAM precoated silica gel aluminum sheets. Spots were visualized by an UV-handlamp (254 and 365 nm). Silica gel 60 (0.063–0.200 mm) for column chromatography was purchased from Merck (mentioned as silica) was used for column chromatography, if not otherwise stated.

NMR spectra were obtained at the Institut für Anorganische und Analytische Chemie (WWU), using an Agilent DD2 500 or a Bruker Avance II 400. All measurements were performed at room temperature unless mentioned otherwise. The <sup>1</sup>H NMR and <sup>13</sup>C NMR chemical shifts (δ) of the signals are given in parts per million and are referenced to the residual proton signal in the deuterated solvent DCM-*d*<sub>2</sub> (<sup>1</sup>H: 5.32 ppm / <sup>13</sup>C: 54.0 ppm) or tetrahydrofuran-*d*<sub>8</sub> (<sup>1</sup>H: 3.58 ppm, 1.73 ppm / <sup>13</sup>C: 67.57 ppm, 25.37 ppm). The signal multiplicities are abbreviated as follows: s, singlet; d, doublet; t, triplet; q, quartet; m, multiplet.

Exact mass (EM) determination by mass spectrometry (MS) was carried out at the Organisch-Chemisches Institut in Münster (WWU) using a LTQ Orbitrap LTQ XL (Thermo-Fisher Scientific, Bremen) with electron spray injection (ESI).

Absorption spectra were measured on a Varian Cary 100 double-beam UV–vis-NIR spectrometer and baseline-corrected. Steady-state excitation and emission spectra were recorded on a FluoTime300 spectrometer from PicoQuant equipped with a 300 W ozone-free Xe lamp (250–900 nm), a 10 W Xe flash-lamp (250–900 nm, pulse width <10  $\mu$ s) with repetition rates of 0.1–300 Hz, an excitation monochromator (Czerny–Turner 2.7 nm/mm dispersion, 1200 grooves/mm, blazed at 300 nm), diode lasers (pulse width <80 ps) operated by a computer-controlled laser driver PDL-820 (repetition rate up to 80 MHz, burst mode for slow and weak decays), two emission monochromators (Czerny–Turner, selectable gratings blazed at 500 nm with 2.7 nm/mm dispersion and 1200 grooves/mm, or blazed at 1250 nm with 5.4 nm/mm dispersion and 600 grooves/mm), Glan–Thompson polarizers for excitation (Xe-lamps) and emission, a Peltier-thermostatized sample holder from Quantum Northwest (–40 °C–105 °C), and two detectors, namely a PMA Hybrid 40 (transit time spread FWHM < 120 ps, 300–720 nm) and a R5509-42 NIR-photomultiplier tube (transit time spread FWHM 1.5 ns, 300–1400 nm) with external cooling (–80 °C) from Hamamatsu. Steady-state and fluorescence lifetimes were recorded in TCSPC mode by a PicoHarp 300 (minimum base resolution 4 ps). Emission and excitation spectra were corrected for source intensity (lamp and grating) by standard correction curves. Lifetime analysis was performed using the commercial FluoFit software. The quality of the fit was assessed by minimizing the reduced chi squared function ( $\chi^2$ ) and visual inspection of the weighted residuals and their autocorrelation. Luminescence quantum yields were measured with a Hamamatsu Photonics absolute PL quantum yield measurement system (C9920-02) equipped with a L9799-01 CW Xenon light source (150 W), monochromator, C7473 photonic multi-channel analyzer, integrating sphere and employing U6039-05 PLQY measurement software (Hamamatsu Photonics, Ltd., Shizuoka, Japan). All solvents used were of spectrometric grade (Uvasol®).

Dynamic Light Scattering (DLS) measurements were performed in a Zetasizer Ultra® with XS Explorer® software (Malvern Panalytical). Measurements were performed in Forward Scattering mode (173 °) Samples were measured in 1 cm optic path quartz cuvettes at 25 °C with a stabilization time of 2 min. All sample were measured in triplicate.

## Section S2: Synthesis and characterization of *p*-phenyl substituted 2,3-dicyano-6,7-diphenylnaphthalenes

### General Procedure:

6,7-dibromonaphthalene-2,3-dicarbonitrile (**1**) was synthesized according to the published procedure [1–3]. The *p*-phenyl-2,3-disubstituted-6,7-diphenylnaphthalenes were synthesized by the Suzuki-Miyaura reaction from 6,7-dibromo-2,3-dicyanonaphthalene (**1**) with the corresponding boronic acids (Scheme 1). A mixture of **1** (1 equiv), the corresponding *p*-substituted-phenylboronic acid (4 equiv.) and a saturated aqueous solution of K<sub>2</sub>CO<sub>3</sub> (5 mL) were stirred in 50 mL of boiling mixture 1,4-dioxane:acetonitrile (8:3 v/v) under argon. The dichloro-bis(triphenylphosphine) palladium (0.01 equiv) was added to the boiling mixture. The reaction was carried out for 6 h (TLC control: Al<sub>2</sub>O<sub>3</sub>, F<sub>254</sub>, ethyl acetate/hexane 1:4). Water was added into the reaction mixture when it was reached room temperature. The product was collected by extraction with dichloromethane and the organic layer was dried with anhydrous MgSO<sub>4</sub>. The residue was treated by flash chromatography in silica (ethyl acetate/hexane 1:2) to remove gross impurities. The resulting compound was additionally purified by chromatography on a column with silica using DCM as the eluent to obtain the corresponding *p*-phenyl-6,7-disubstituted naphthalene-2,3-dicarbonitrile.

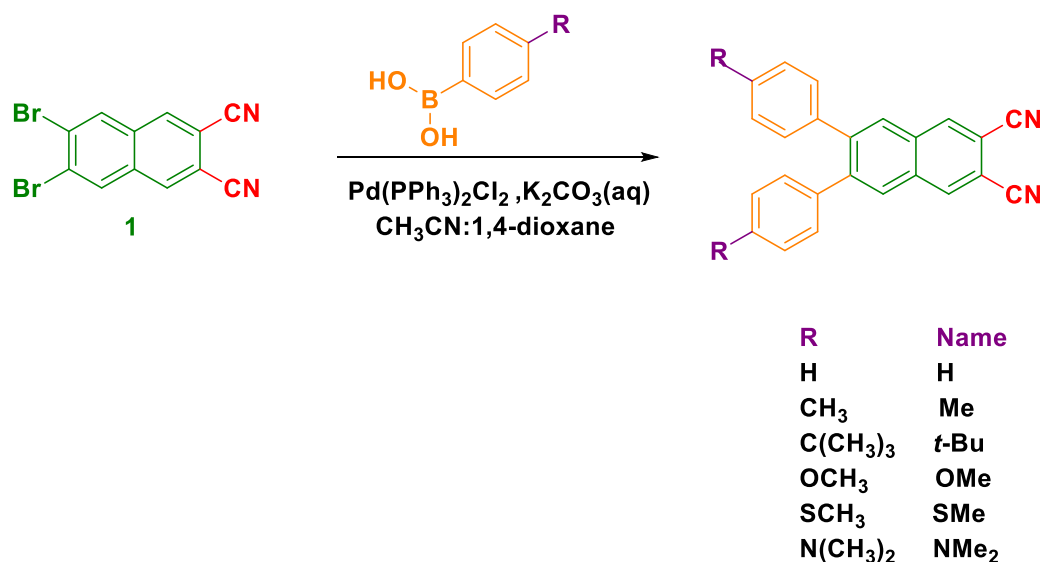

**Scheme 1:** Synthesis of *p*-phenyl-6,7-disubstituted naphthalene-2,3-dicarbonitrile.



## Synthesis:

### Synthesis of 6,7-diphenylnaphthalene-2,3-dicarbonitrile (**H**):

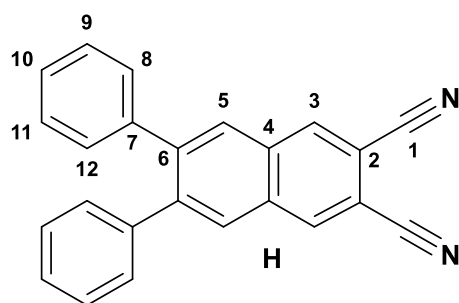

**H** was synthesized according to a modified literature procedure [3] using 6,7-dibromonaphthalene-2,3-dicarbonitrile (50 mg, 0.15 mmol) and phenylboronic acid (72 mg, 0.6 mmol). Molecular formula: C<sub>24</sub>H<sub>14</sub>N<sub>2</sub> (pale yellow solid); yield: 61 % (30 mg, 0.09 mmol).

<sup>1</sup>H NMR (500 MHz, THF-d<sub>8</sub>), δ (ppm) = 8.62 (s, 2H, 3-H), 8.13 (s, 2H, 5-H), 7.27 – 7.24 (m, 6H, 9/10/11-H), 7.26 – 7.19 (m, 4H, 8/12-H).

<sup>13</sup>C-{<sup>1</sup>H}-NMR (126 MHz, THF-d<sub>8</sub>), δ (ppm) = 144.90(C-6), 140.97(C-7), 136.69(C-4), 133.55(C-3), 130.98(C-5), 130.65(C-10), 128.97(C-8), 128.31(C-9), 116.70(C-1), 111.20(C-2).

**MS-ESI-EM** (CH<sub>2</sub>Cl<sub>2</sub>, M = C<sub>24</sub>H<sub>14</sub>N<sub>2</sub>)

m/z (%) calcd.: [M + Na]<sup>+</sup> = 353.10492.

m/z (%) found: [M + Na]<sup>+</sup> = 353.10485.

### Synthesis of 6,7-di-*p*-tolyl naphthalene-2,3-dicarbonitrile (**Me**):

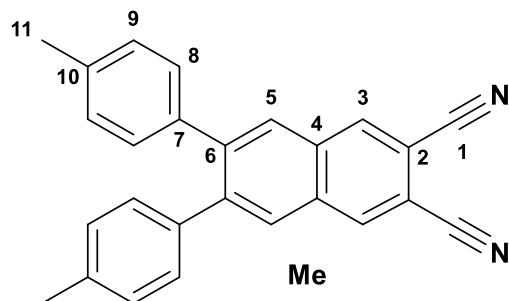

**Me** was synthesized according to the general procedure using 6,7-dibromonaphthalene-2,3-dicarbonitrile (50 mg, 0.15 mmol) and *p*-tolylboronic acid (81 mg, 0.6 mmol). Molecular formula: C<sub>26</sub>H<sub>18</sub>N<sub>2</sub> (pale yellow solid); yield: 58% (31 mg, 0.08 mmol).

<sup>1</sup>H NMR (500 MHz, THF-d<sub>8</sub>), δ (ppm) = 8.57 (s, 2H, H<sub>3</sub>), 8.05 (s, 2H, 5-H), 7.08 (q, J = 8.1 Hz, 8H, 8/9-H), 2.29 (s, 6H, 11-H).

<sup>13</sup>C-{<sup>1</sup>H}-NMR (126 MHz, THF-d<sub>8</sub>), δ (ppm) = 144.91(C-6), 138.16 (C-7), 138.10 (C-10), 136.61(C-3), 133.46(C-4), 130.84(C-5), 130.50(C-8), 129.66(C-9), 116.74(C-1), 110.96(C-2), 21.17(C-11).

**MS-ESI-EM** (CH<sub>2</sub>Cl<sub>2</sub>, M = C<sub>26</sub>H<sub>18</sub>N<sub>2</sub>)

m/z (%) calcd.: [M + Na]<sup>+</sup> = 381.13622.

m/z (%) found: [M + Na]<sup>+</sup> = 381.13614.

### Synthesis of 6,7-bis(4-(*tert*-butyl)phenyl)naphthalene-2,3-dicarbonitrile (*t*-Bu):

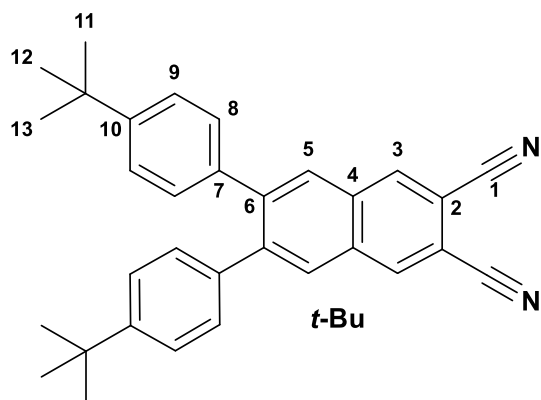

***t*-Bu** was synthesized according to a modified literature procedure [2] using 6,7-dibromonaphthalene-2,3-dicarbonitrile (50 mg, 0.15 mmol) and (4-(*tert*-butyl)phenyl)boronic acid (106 mg, 0.6 mmol). Molecular formula: C<sub>32</sub>H<sub>30</sub>N<sub>2</sub> (pale yellow solid); yield: 59% (38 mg, 0.08 mmol).

**<sup>1</sup>H NMR** (500 MHz, DCM-d<sub>2</sub>), δ (ppm) = 8.39 (s, 2H, 3-H), 8.00 (s, 2H, 5-H), 7.31 (d, J = 8.4 Hz, 4H, 8-H), 7.15 (d, J = 8.4 Hz, 4H, 9-H), 1.31 (s, 18H, 12/13/14-H).

**<sup>13</sup>C-{<sup>1</sup>H}-NMR** (126 MHz, DCM-d<sub>2</sub>), δ (ppm) = 151.44(C-10), 144.99(C-7), 137.42(C-6), 136.26(C-3), 132.92(C-4), 130.46(C-5), 129.94(C-8), 125.65(C-9), 116.84(C-1), 110.43(C-2), 35.01(C-11), 31.56(C-12,13,14).

**MS-ESI-EM** (CH<sub>2</sub>Cl<sub>2</sub>, M = C<sub>32</sub>H<sub>30</sub>N<sub>2</sub>)

m/z (%) calcd.: [M + Na]<sup>+</sup> = 465.23012.

m/z (%) found: [M + Na]<sup>+</sup> = 465.22998.

### Synthesis of 6,7-bis(4-methoxyphenyl)naphthalene-2,3-dicarbonitrile (OMe):

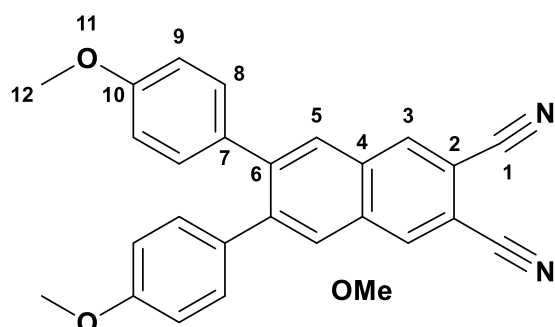

**OMe** was synthesized according to the general procedure using 6,7-dibromonaphthalene-2,3-dicarbonitrile (50 mg, 0.15 mmol) and (4-methoxyphenyl)boronic acid (91 mg, 0.6 mmol). Molecular formula: C<sub>26</sub>H<sub>18</sub>N<sub>2</sub>O<sub>2</sub> (pale yellow solid); yield: 51% (29 mg, 0.07 mmol).

**<sup>1</sup>H NMR** (500 MHz, DCM-d<sub>2</sub>), δ (ppm) = 8.37 (s, 2H, 3-H), 7.96 (s, 2H, 5-H), 7.18 – 7.12 (m, 4H, 8-H), 6.86 – 6.82 (m, 4H, 9-H), 3.80 (s, 6H, 12-H).

**<sup>13</sup>C-{<sup>1</sup>H}-NMR** (126 MHz, DCM-d<sub>2</sub>), δ (ppm) = 159.76(C-10), 144.47(C-6), 136.01(C-3), 132.72(C-4), 132.54(C-7), 131.34(C-8), 130.13(C-5), 116.69(C-1), 114.09(C-9), 110.16(C-2), 55.65(C-12).

**MS-ESI-EM** (CH<sub>2</sub>Cl<sub>2</sub>, M = C<sub>26</sub>H<sub>18</sub>N<sub>2</sub>O<sub>2</sub>)

m/z (%) calcd.: [M] = 390.13628.

m/z (%) found: [M] = 390.13624.

### Synthesis of 6,7-bis(4-(methylthio)phenyl)naphthalene-2,3-dicarbonitrile (SMe):

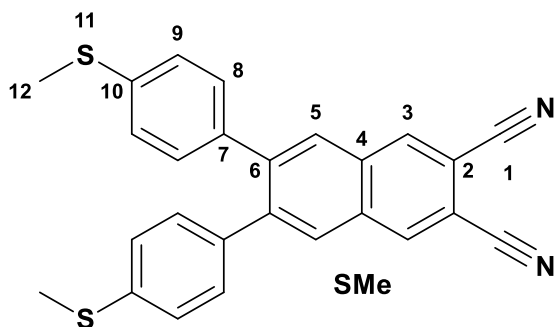

**SMe** was synthesized according to the general procedure using 6,7-dibromonaphthalene-2,3-dicarbonitrile (50 mg, 0.15 mmol) and (4-(methylthio)phenyl)boronic acid (100 mg, 0.6 mmol). Molecular formula:  $C_{26}H_{18}N_2S_2$  (pale yellow solid); yield: 56% (35 mg, 0.08 mmol).

$^1H$  NMR (400 MHz, THF- $d_8$ ),  $\delta$  (ppm) = 8.61 (s, 2H, 3-H), 8.10 (s, 2H, 5-H), 7.20-7.15 (m, 8H, 9/8-H), 2.46 (s, 6H, 12-H).

$^{13}C$ - $\{^1H\}$ -NMR (101 MHz, THF- $d_8$ ),  $\delta$  (ppm) = 144.39(C-6), 140.20(C-10), 137.37(C-7), 136.80(C-3), 133.69(C-4), 131.14 (C-5), 131.11 (C-8), 126.68(C-9), 116.88(C-1), 111.29(C-2), 15.18(C-12).

**MS-ESI-EM** ( $CH_2Cl_2$ ,  $M = C_{26}H_{18}N_2S_2$ )

$m/z$  (%) calcd.:  $[M + Na]^+ = 445.08036$ .

$m/z$  (%) found:  $[M + Na]^+ = 445.08025$ .

### Synthesis of 6,7-bis(4-(dimethylamino)phenyl)naphthalene-2,3-dicarbonitrile (NMe<sub>2</sub>):

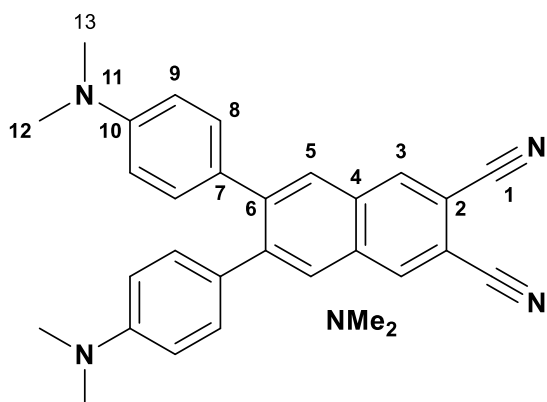

**NMe<sub>2</sub>** was synthesized according to the general procedure using 6,7-dibromonaphthalene-2,3-dicarbonitrile (50 mg, 0.15 mmol) and (4-(dimethylamino)phenyl)boronic acid (98 mg, 0.6 mmol). Molecular formula:  $C_{28}H_{24}N_4$  (yellow solid); yield: 63% (39 mg, 0.09 mmol).

$^1H$  NMR (400 MHz, DCM- $d_2$ ),  $\delta$  (ppm) = 8.30 (s, 2H, 3-H), 7.88 (s, 2H, 5-H), 7.15 – 7.09 (m, 4H, 8-H), 6.69 – 6.61 (m, 4H, 9-H), 2.96 (s, 12H, 12-H).

$^{13}C$ - $\{^1H\}$ -NMR (101 MHz, DCM- $d_2$ ),  $\delta$  (ppm) = 150.36(C-10), 145.08(C-6), 135.81(C-3), 132.55(C-4), 130.88(C-8), 129.70(C-5), 128.09(C-7), 116.90(C-1), 112.19(C-9), 109.49(C-2), 40.49(C-12).

**MS-ESI-EM** ( $CH_2Cl_2$ ,  $M = C_{28}H_{24}N_4$ )

$m/z$  (%) calcd.:  $[M + H]^+ = 417.20737$ .

$m/z$  (%) found:  $[M + H]^+ = 417.20710$ .

## Section S3: NMR spectra of H, Me, *t*-Bu, OMe, SMe & NMe<sub>2</sub>

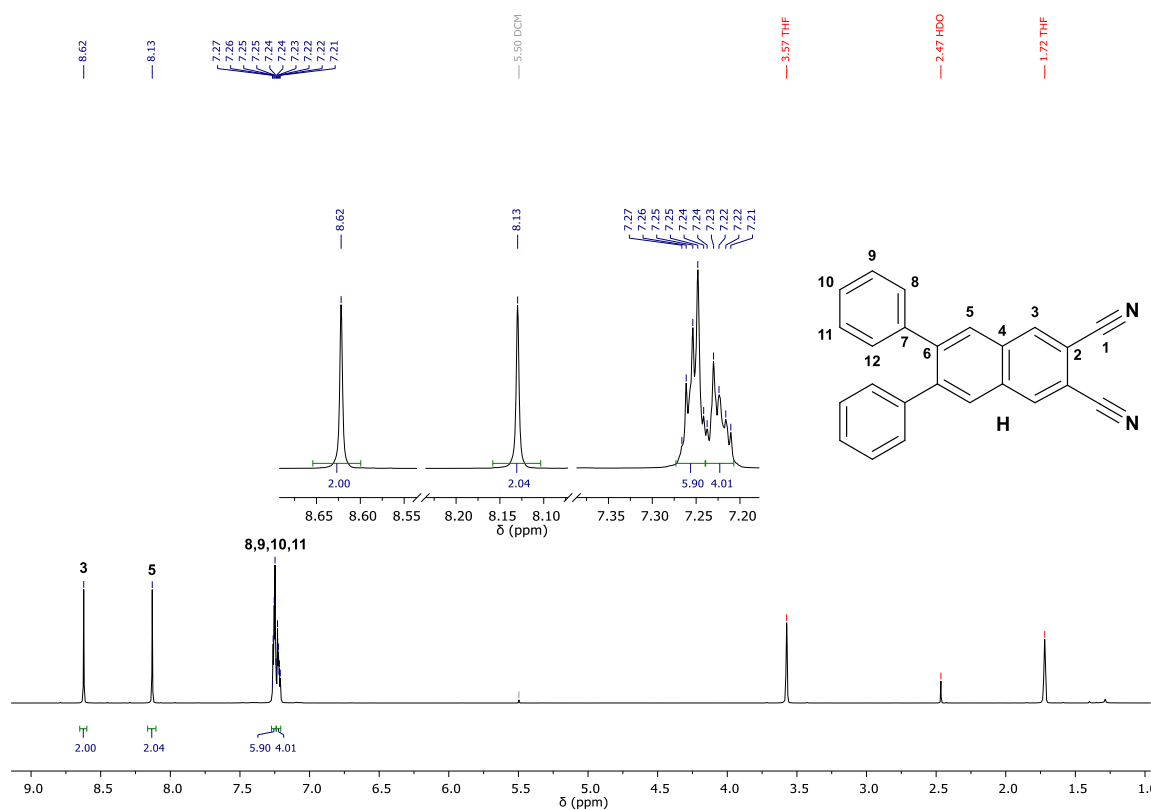

**Figure S1:** <sup>1</sup>H NMR spectrum (500 MHz, THF-*d*<sub>8</sub>) of 6,7-diphenylnaphthalene-2,3-dicarbonitrile (**H**).

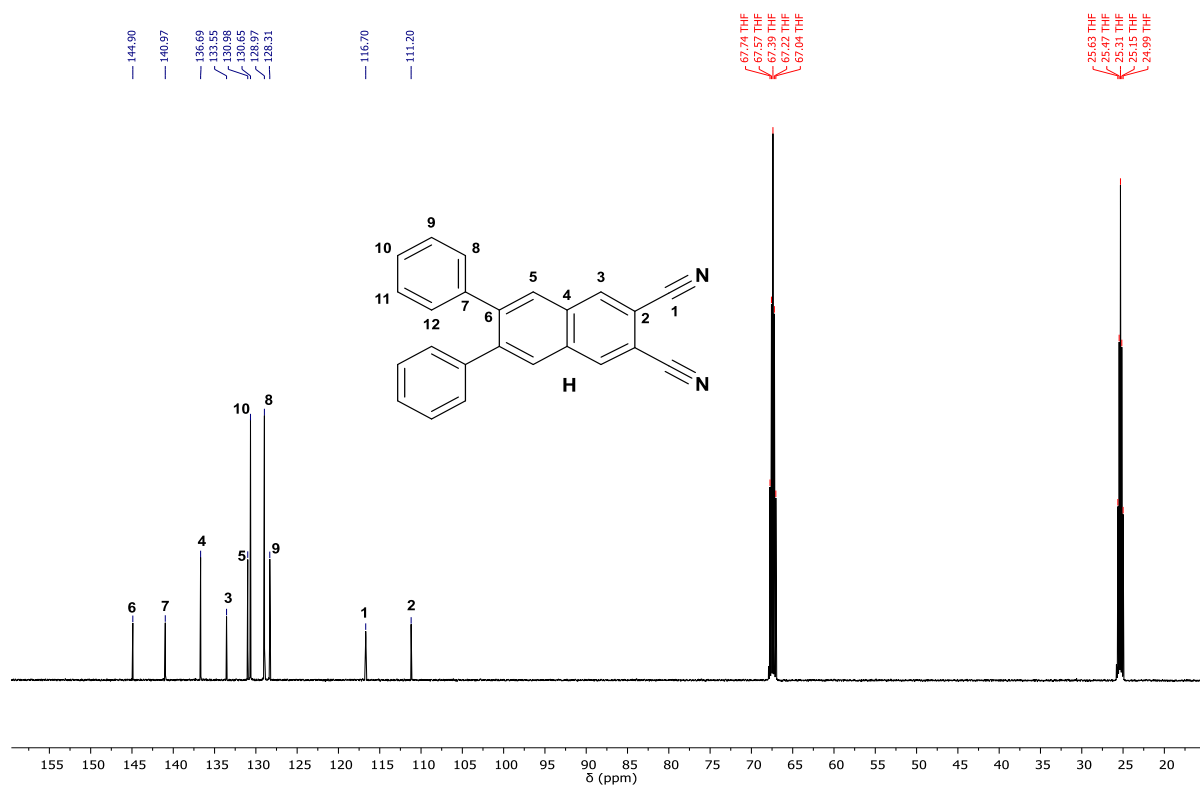

**Figure S2:** <sup>13</sup>C {<sup>1</sup>H} NMR spectrum (126 MHz, THF-*d*<sub>8</sub>) of 6,7-diphenylnaphthalene-2,3-dicarbonitrile (**H**).

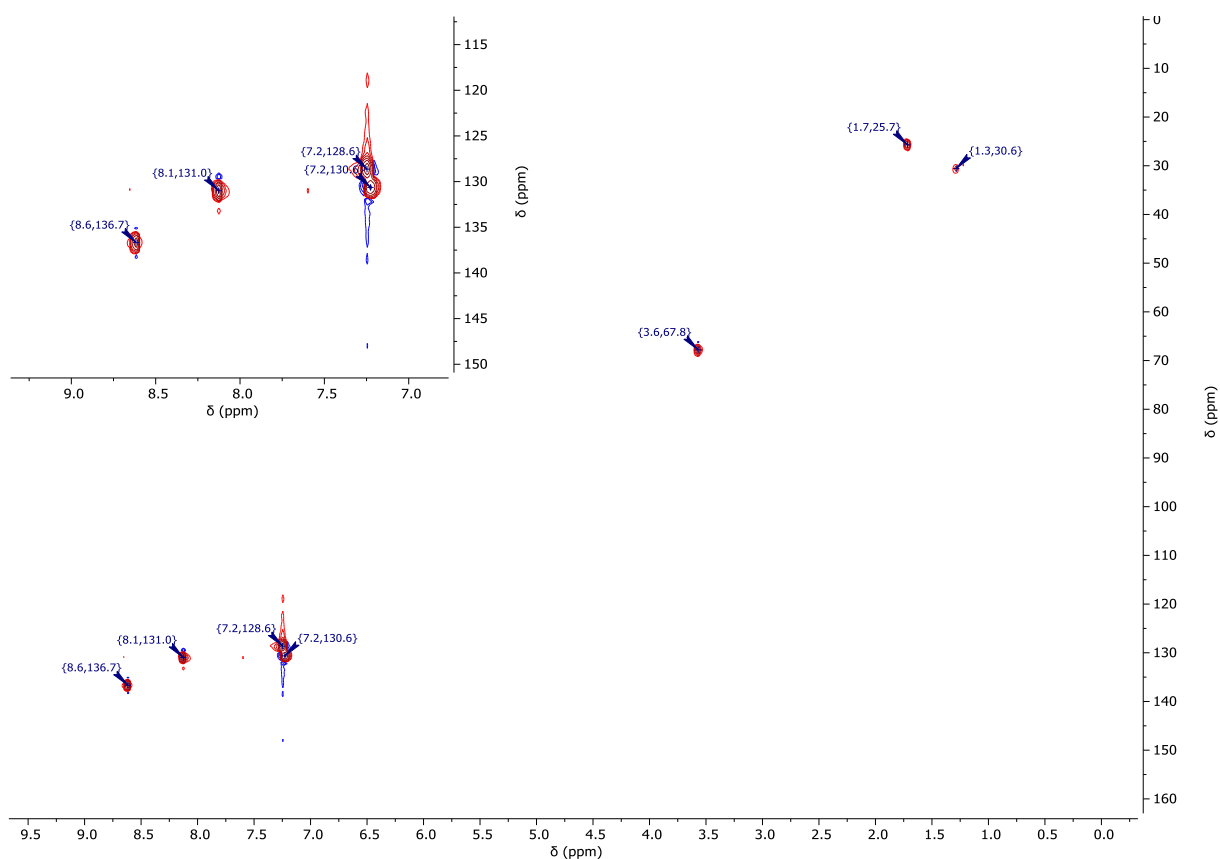

**Figure S3:**  $^1\text{H}/^{13}\text{C}$  gHSQC NMR spectrum (400 MHz/101 MHz,  $\text{THF-d}_8$ ) of 6,7-diphenylnaphthalene-2,3-dicarbonitrile (**H**).

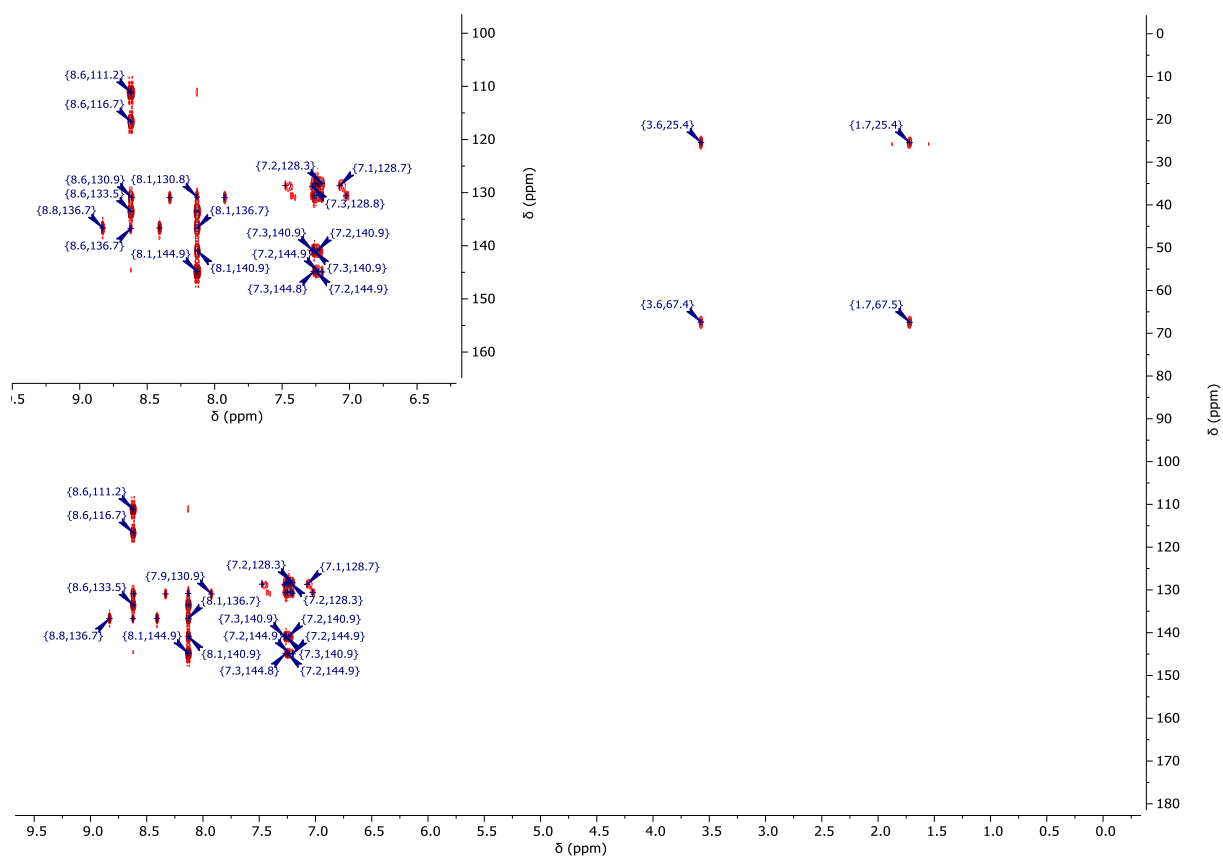

**Figure S4:**  $^1\text{H}/^{13}\text{C}$  gHMBC NMR spectrum (400 MHz/101 MHz,  $\text{THF-d}_8$ ) of 6,7-diphenylnaphthalene-2,3-dicarbonitrile (**H**).

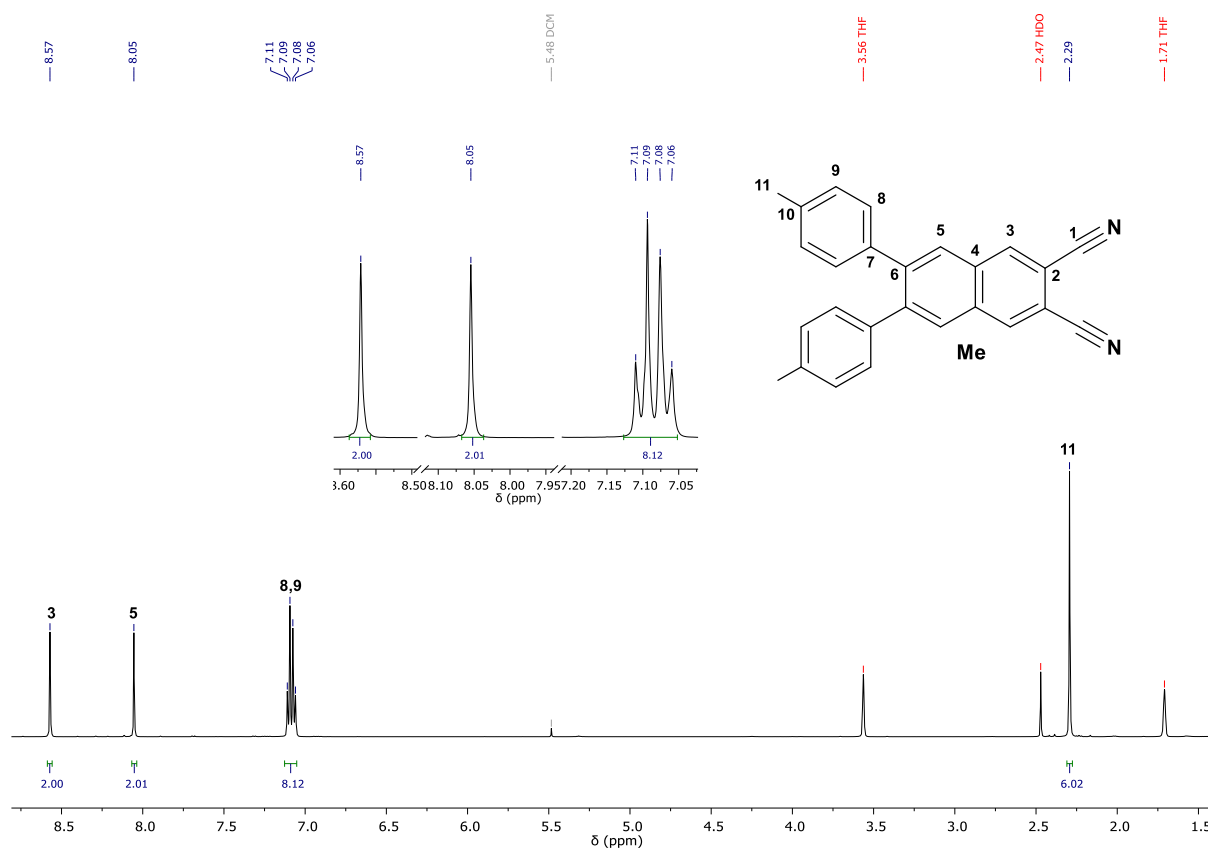

**Figure S5:**  $^1\text{H}$  NMR spectrum (500 MHz,  $\text{THF-d}_8$ ) of 6,7-di-*p*-tolynaphthalene-2,3-dicarbonitrile (**Me**).

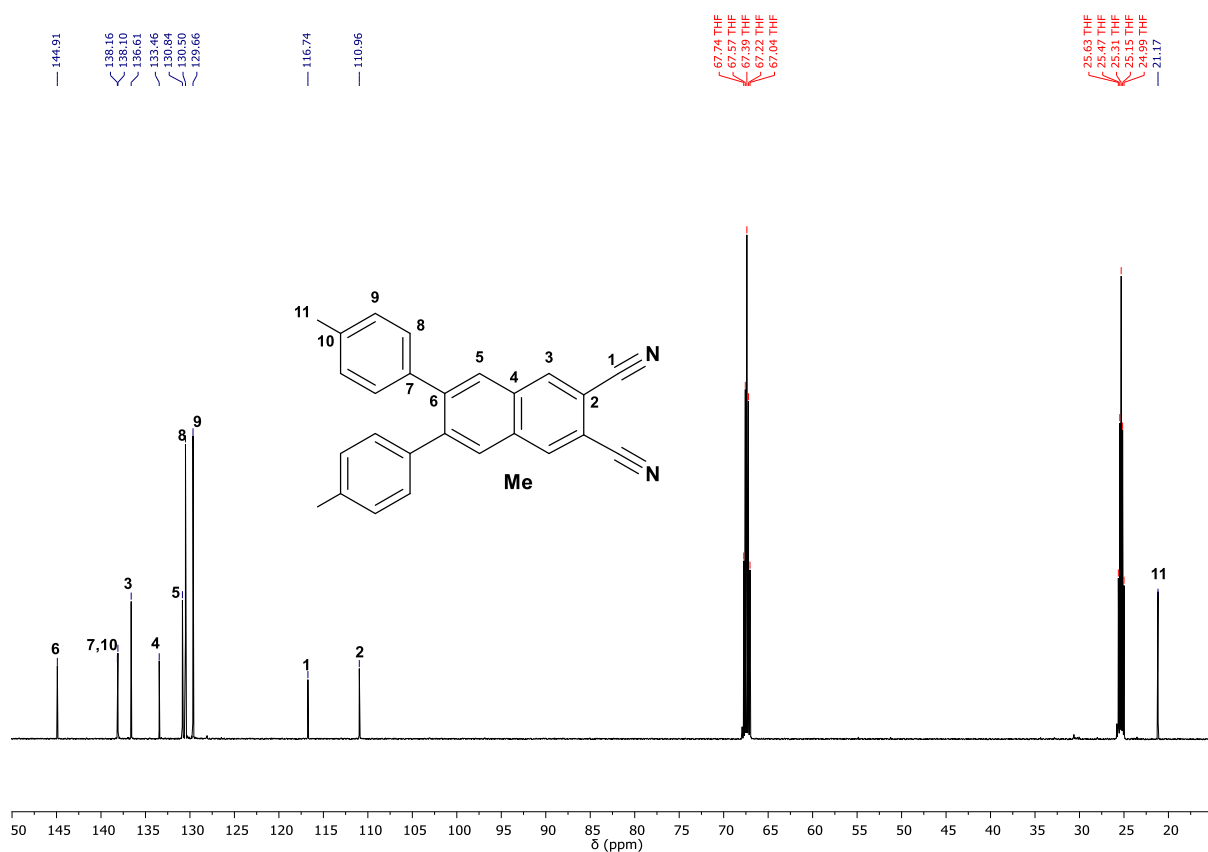

**Figure S6:**  $^{13}\text{C}$   $\{^1\text{H}\}$  NMR spectrum (126 MHz,  $\text{THF-d}_8$ ) of 6,7-di-*p*-tolynaphthalene-2,3-dicarbonitrile (**Me**).

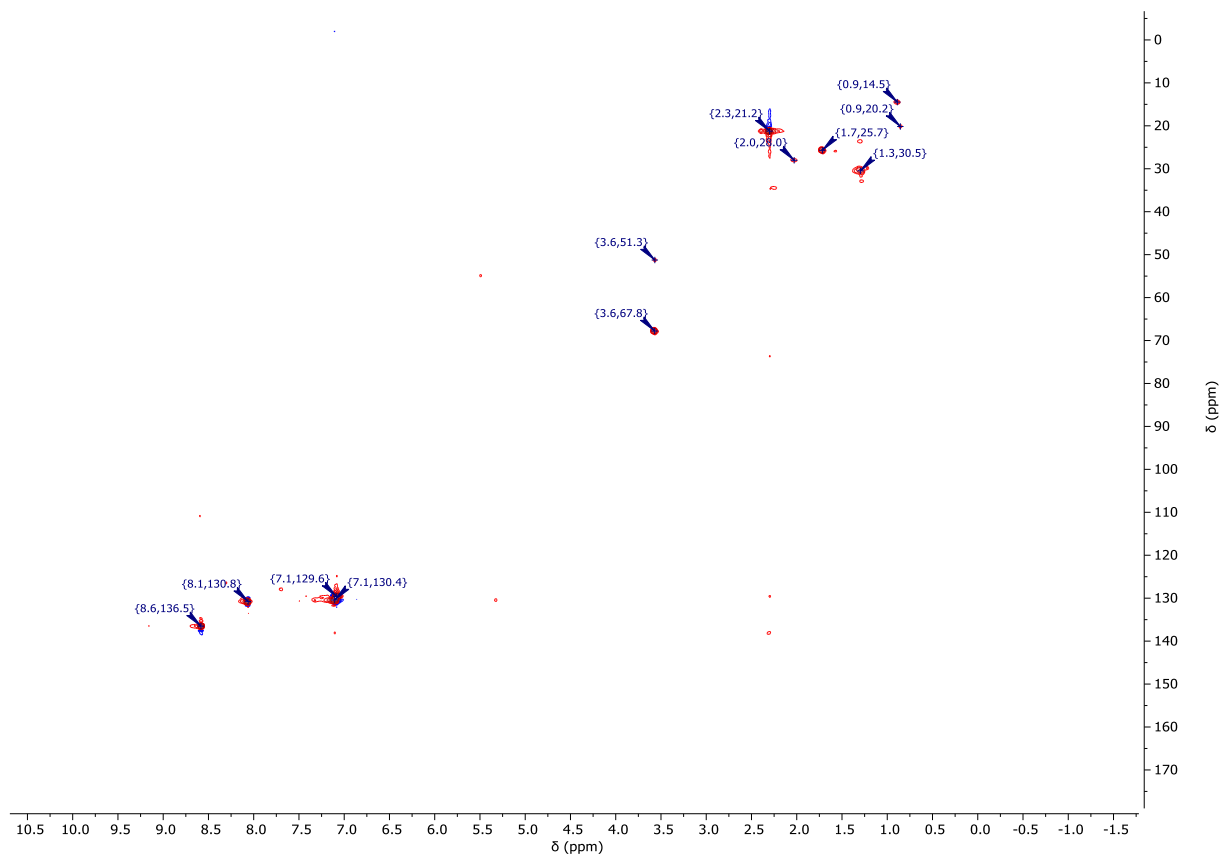

**Figure S7:**  $^1\text{H}/^{13}\text{C}$  gHSQC NMR spectrum (400 MHz/101 MHz,  $\text{THF-d}_8$ ) of 6,7-di-*p*-tolynaphthalene-2,3-dicarbonitrile (**Me**).

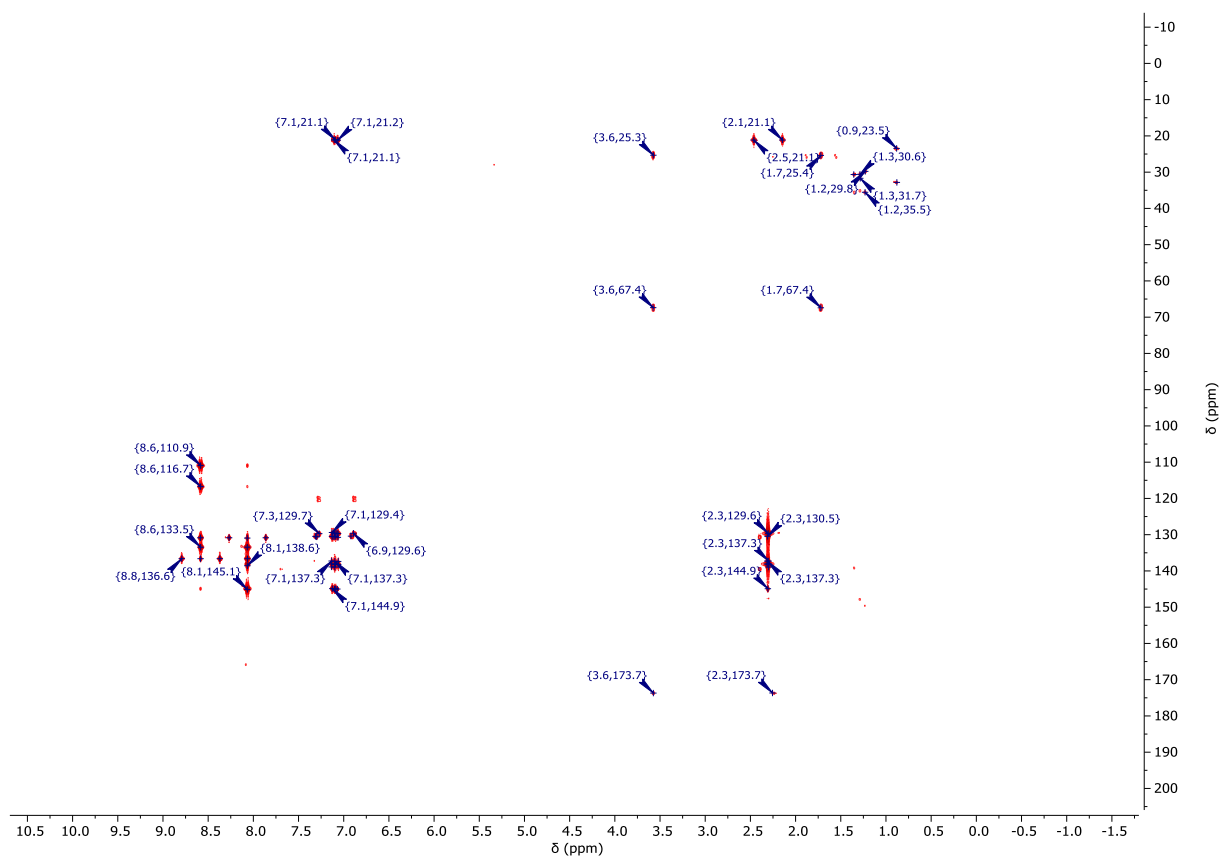

**Figure S8:**  $^1\text{H}/^{13}\text{C}$  gHMBC NMR spectrum (400 MHz/101 MHz,  $\text{THF-d}_8$ ) of 6,7-di-*p*-tolynaphthalene-2,3-dicarbonitrile (**Me**).

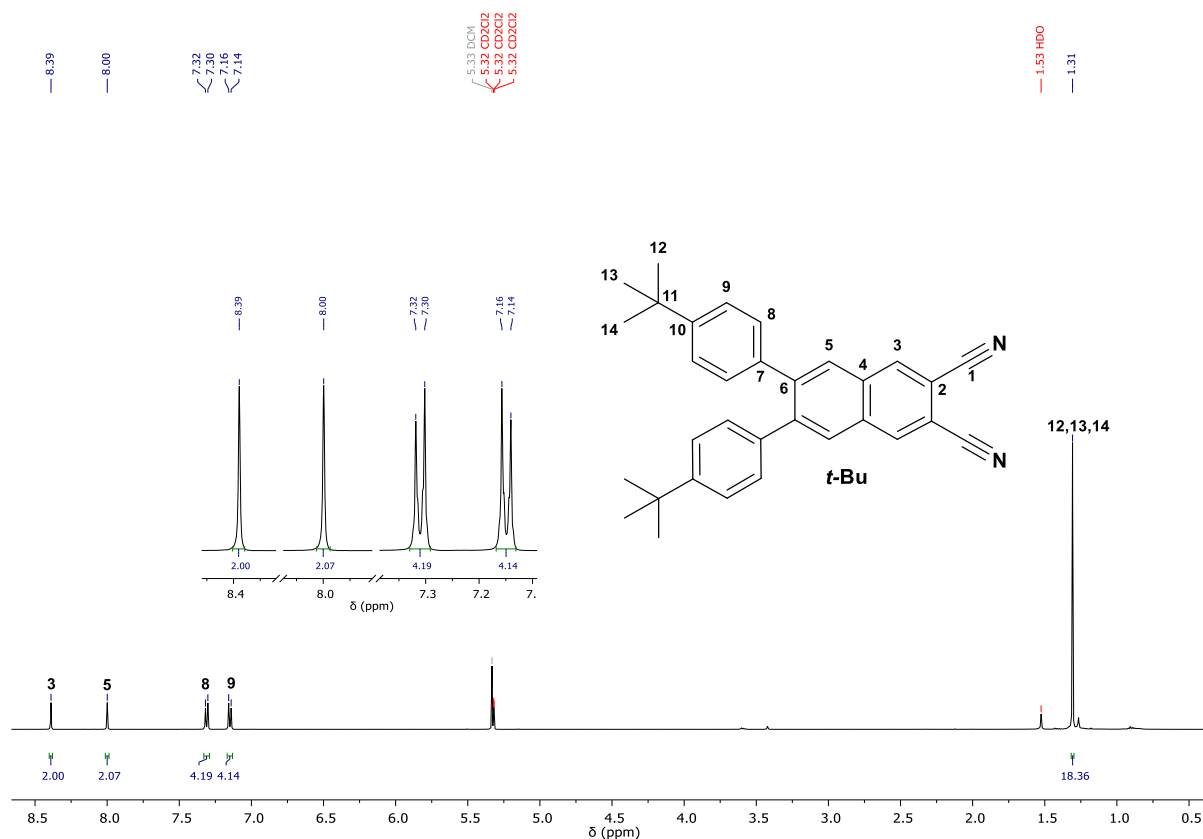

**Figure S9:**  $^1\text{H}$  NMR spectrum (500 MHz,  $\text{DCM-d}_2$ ) of 6,7-bis(4-(*tert*-butyl)phenyl)naphthalene-2,3-dicarbonitrile (**t-Bu**).

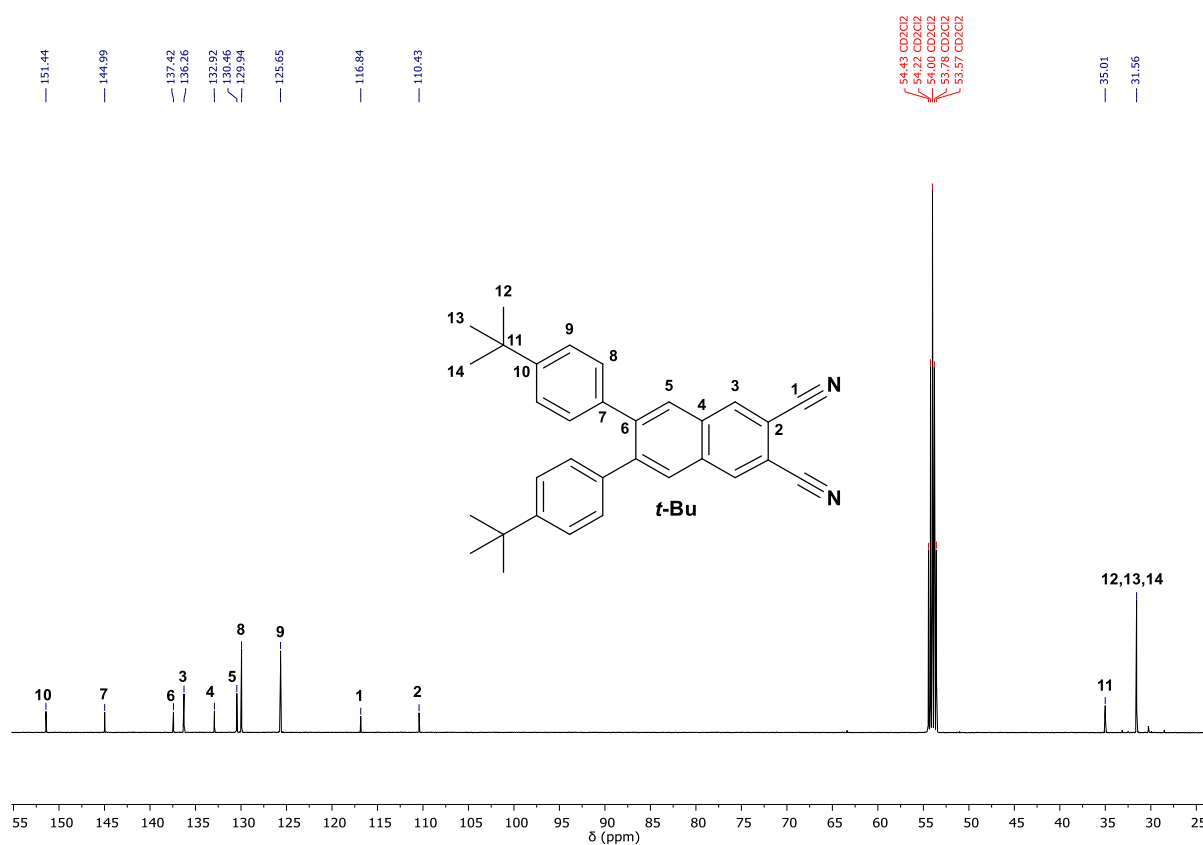

**Figure S10:**  $^{13}\text{C}$   $\{^1\text{H}\}$  NMR spectrum (126 MHz,  $\text{DCM-d}_2$ ) of 6,7-bis(4-(*tert*-butyl)phenyl)naphthalene-2,3-dicarbonitrile (**t-Bu**).



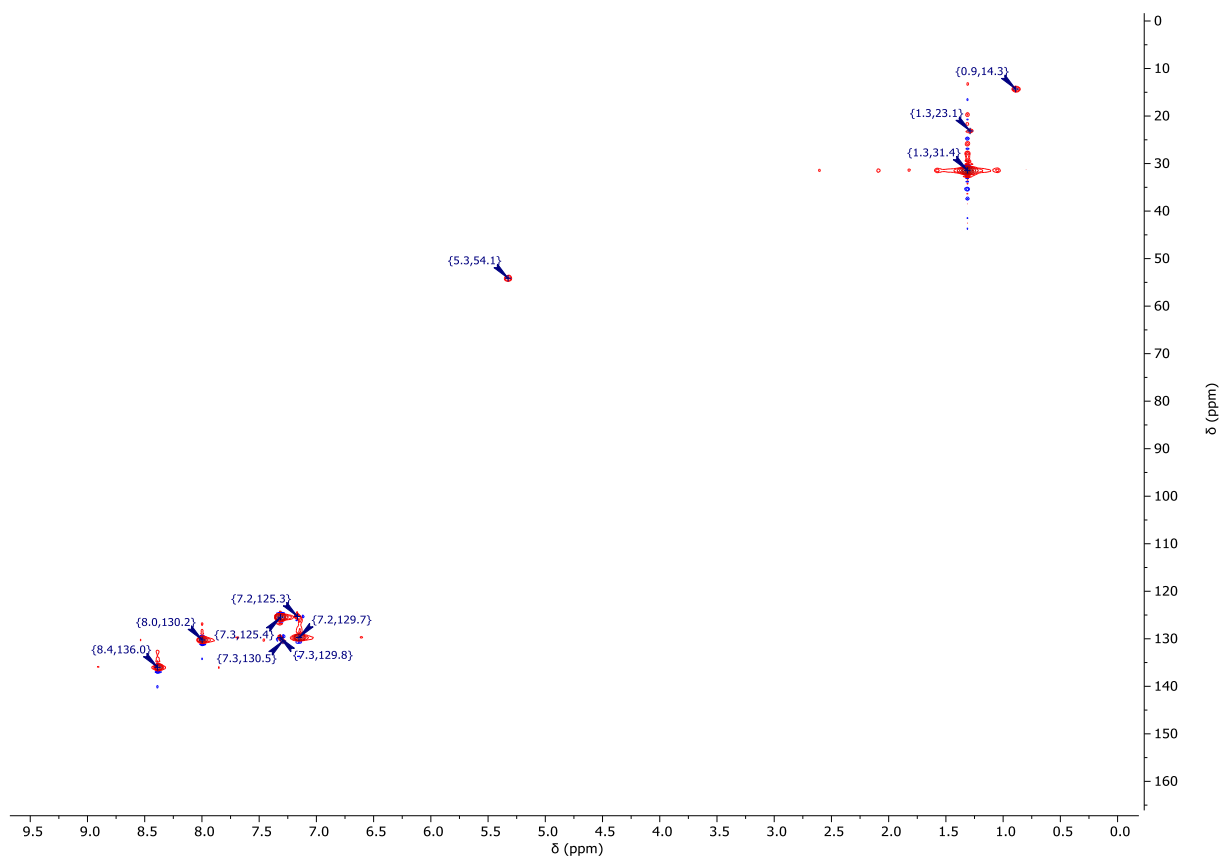

**Figure S11:**  $^1\text{H}/^{13}\text{C}$  gHSQC NMR spectrum (400 MHz/101 MHz,  $\text{DCM}-d_2$ ) of 6,7-bis(4-(tert-butyl)phenyl)naphthalene-2,3-dicarbonitrile (**t-Bu**).

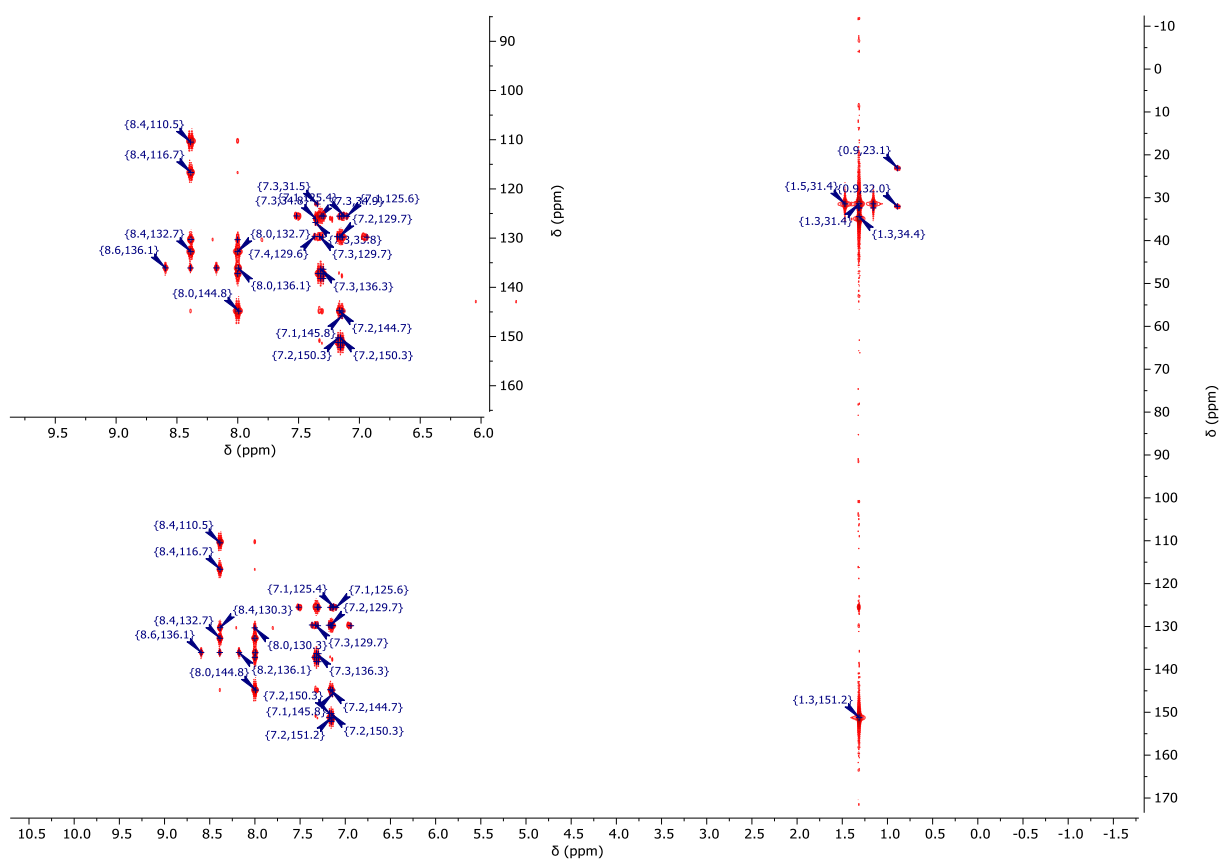

**Figure S12:**  $^1\text{H}/^{13}\text{C}$  gHMBC NMR spectrum (400 MHz/101 MHz,  $\text{DCM}-d_2$ ) of 6,7-bis(4-(tert-butyl)phenyl)naphthalene-2,3-dicarbonitrile (**t-Bu**).

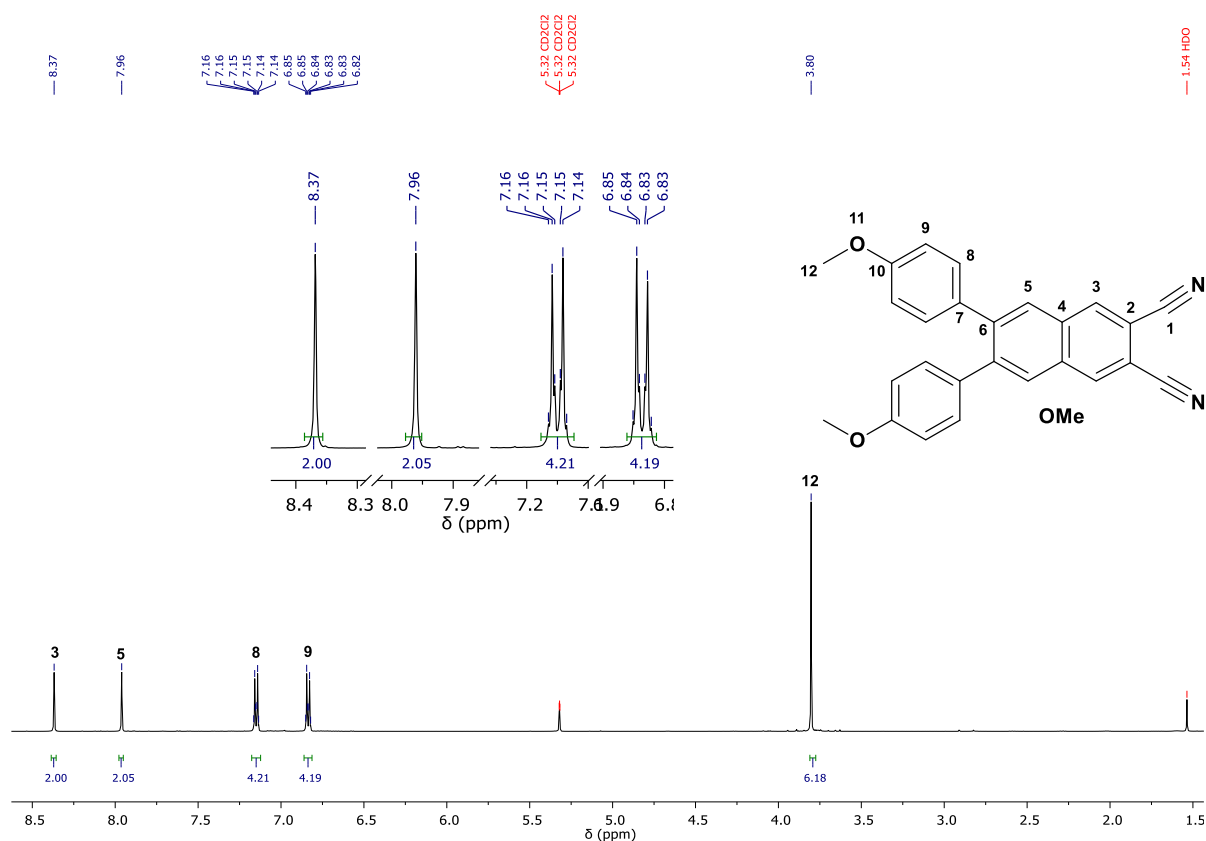

**Figure S13:**  $^1\text{H}$  NMR spectrum (500 MHz,  $\text{DCM-d}_2$ ) of 6,7-bis(4-methoxyphenyl)naphthalene-2,3-dicarbonitrile (**OMe**).

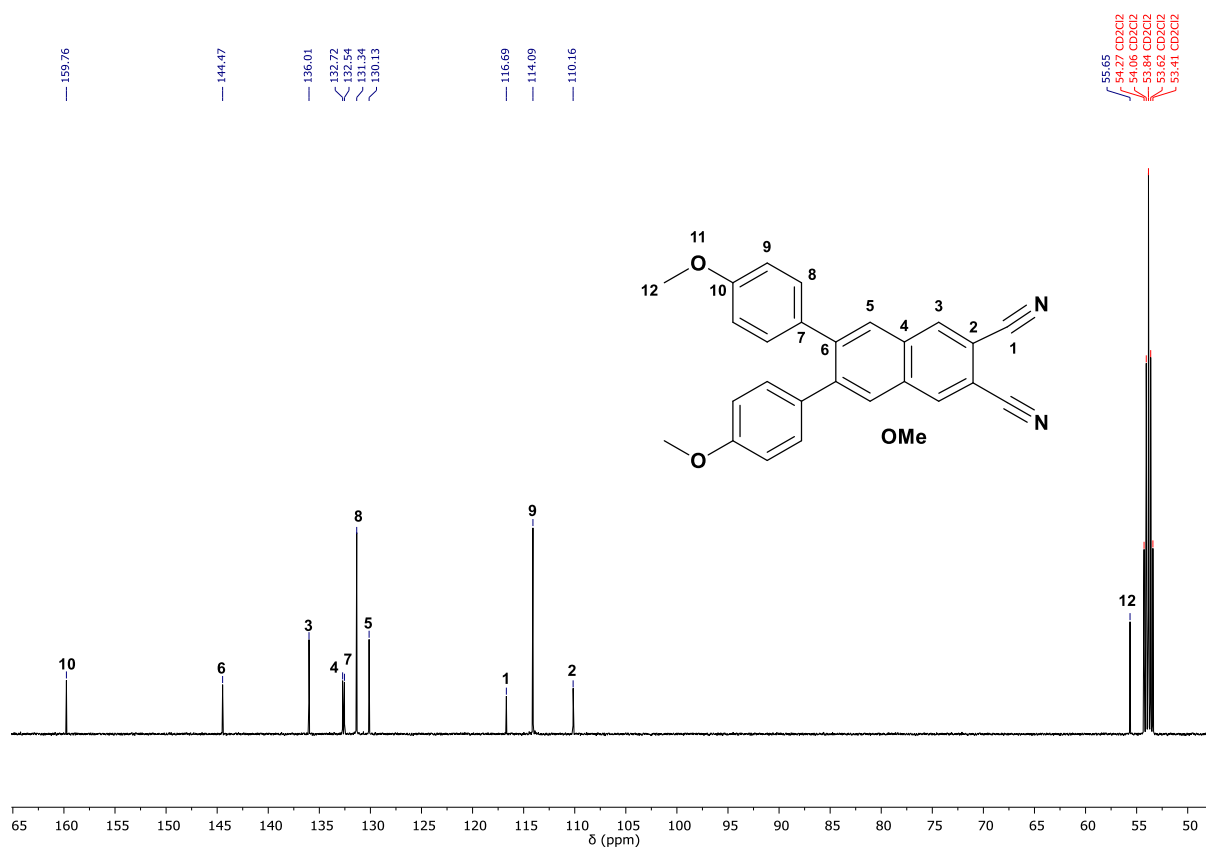

**Figure S14:**  $^{13}\text{C}$   $\{^1\text{H}\}$  NMR spectrum (126 MHz,  $\text{DCM-d}_2$ ) of 6,7-bis(4-methoxyphenyl)naphthalene-2,3-dicarbonitrile (**OMe**).

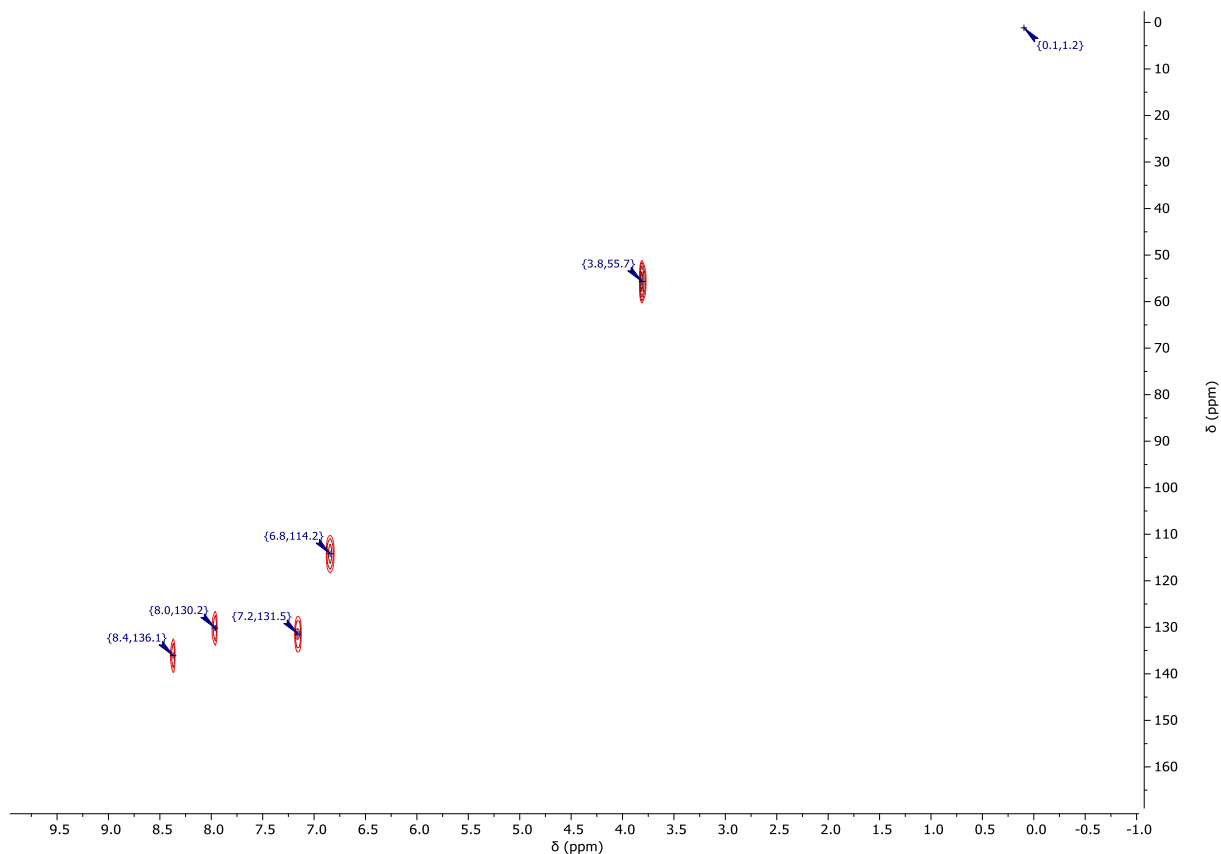

**Figure S15:**  $^1\text{H}/^{13}\text{C}$  gHSQC NMR spectrum (400 MHz/101 MHz,  $\text{DCM}-d_2$ ) 6,7-bis(4-methoxyphenyl)naphthalene-2,3-dicarbonitrile (**OMe**).

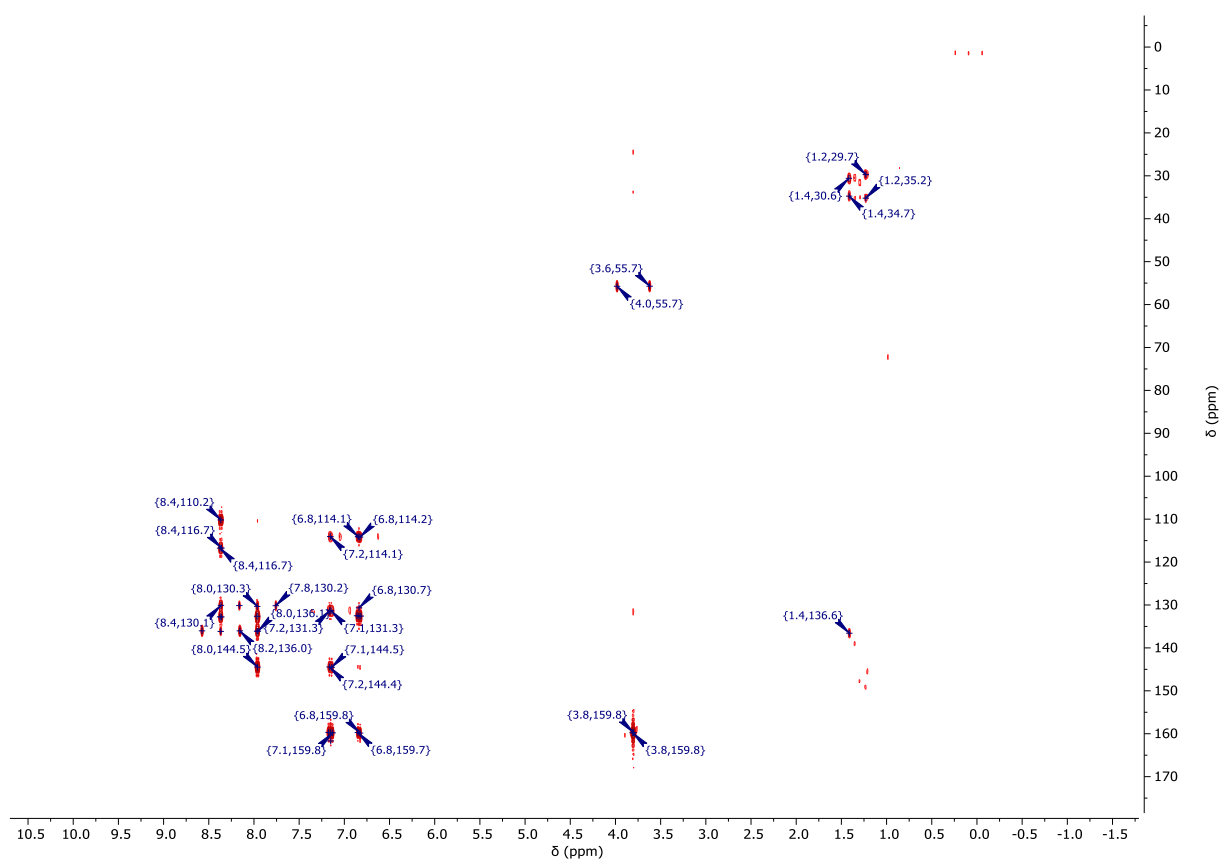

**Figure S16:**  $^1\text{H}/^{13}\text{C}$  gHMBC NMR spectrum (400 MHz/101 MHz,  $\text{DCM}-d_2$ ) of ) 6,7-bis(4-methoxyphenyl)naphthalene-2,3-dicarbonitrile (**OMe**).

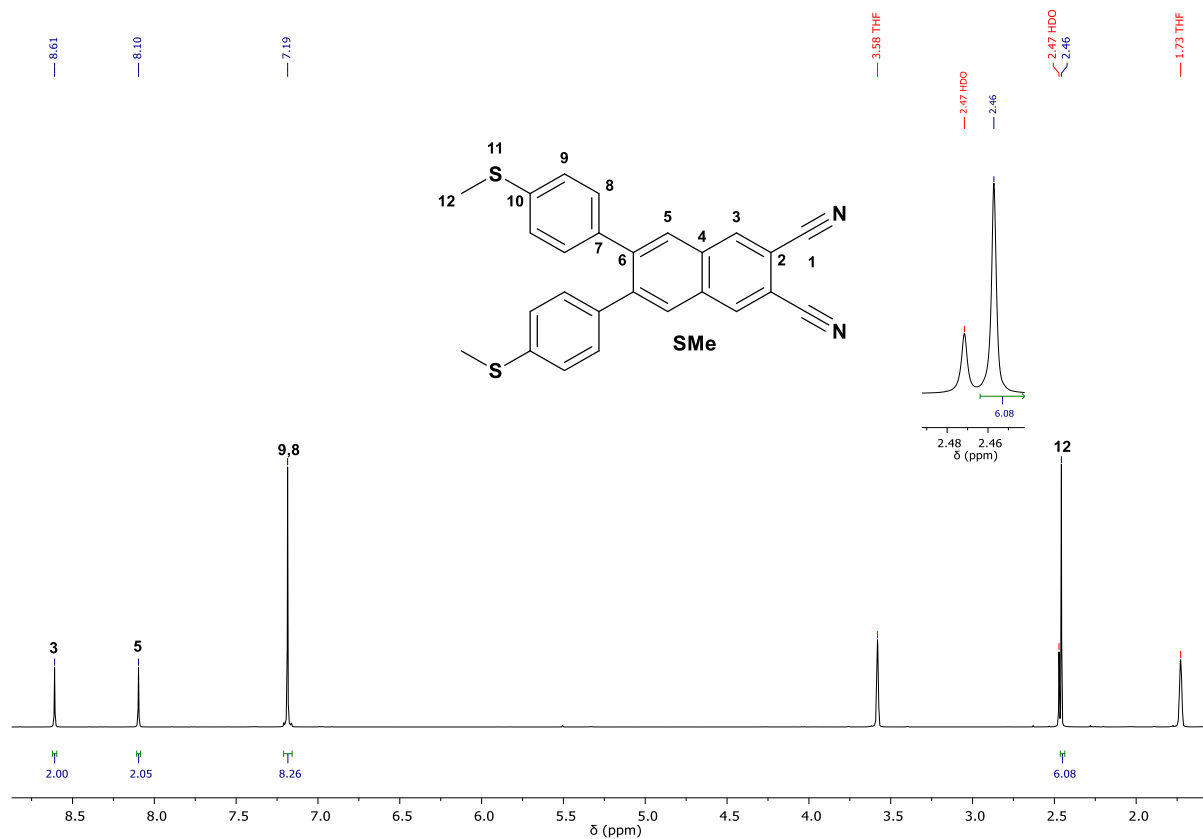

**Figure S17:**  $^1\text{H}$  NMR spectrum (500 MHz,  $\text{THF-d}_8$ ) of 6,7-bis(4-(methylthio)phenyl)naphthalene-2,3-dicarbonitrile (**SMe**).

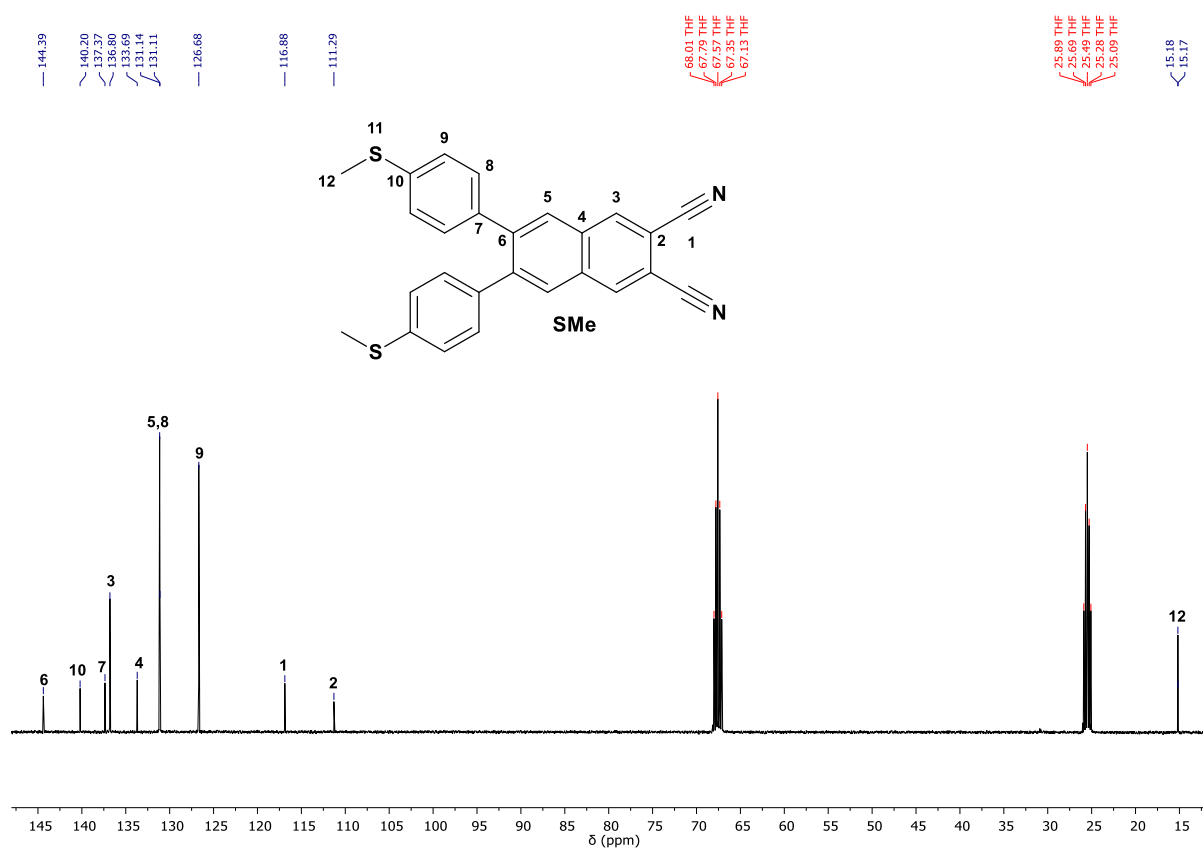

**Figure S18:**  $^{13}\text{C}$   $\{^1\text{H}\}$  NMR spectrum (126 MHz,  $\text{THF-d}_8$ ) of 6,7-bis(4-(methylthio)phenyl)naphthalene-2,3-dicarbonitrile (**SMe**).

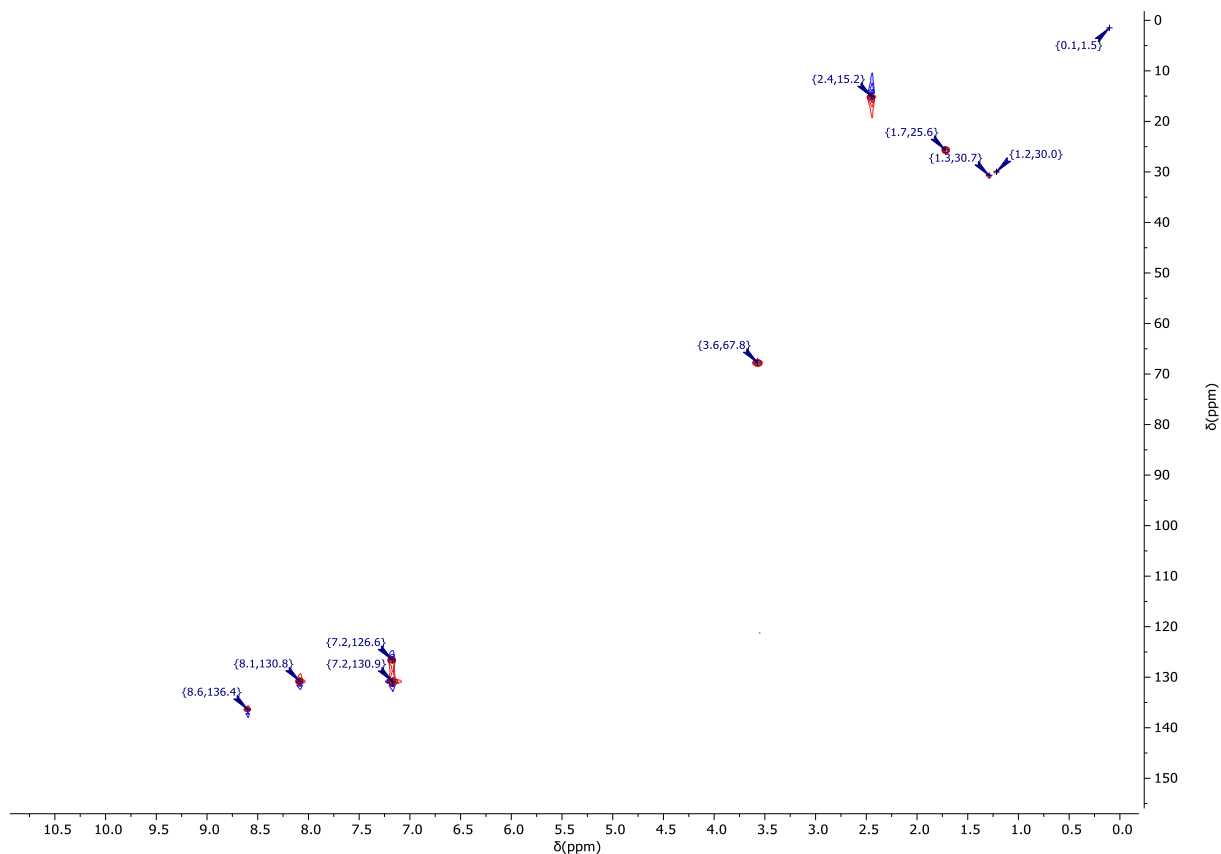

**Figure S19:**  $^1\text{H}/^{13}\text{C}$  gHSQC NMR spectrum (400 MHz/101 MHz,  $\text{THF-}d_8$ ) of 6,7-bis(4-(methylthio)phenyl)naphthalene-2,3-dicarbonitrile (**SMe**).

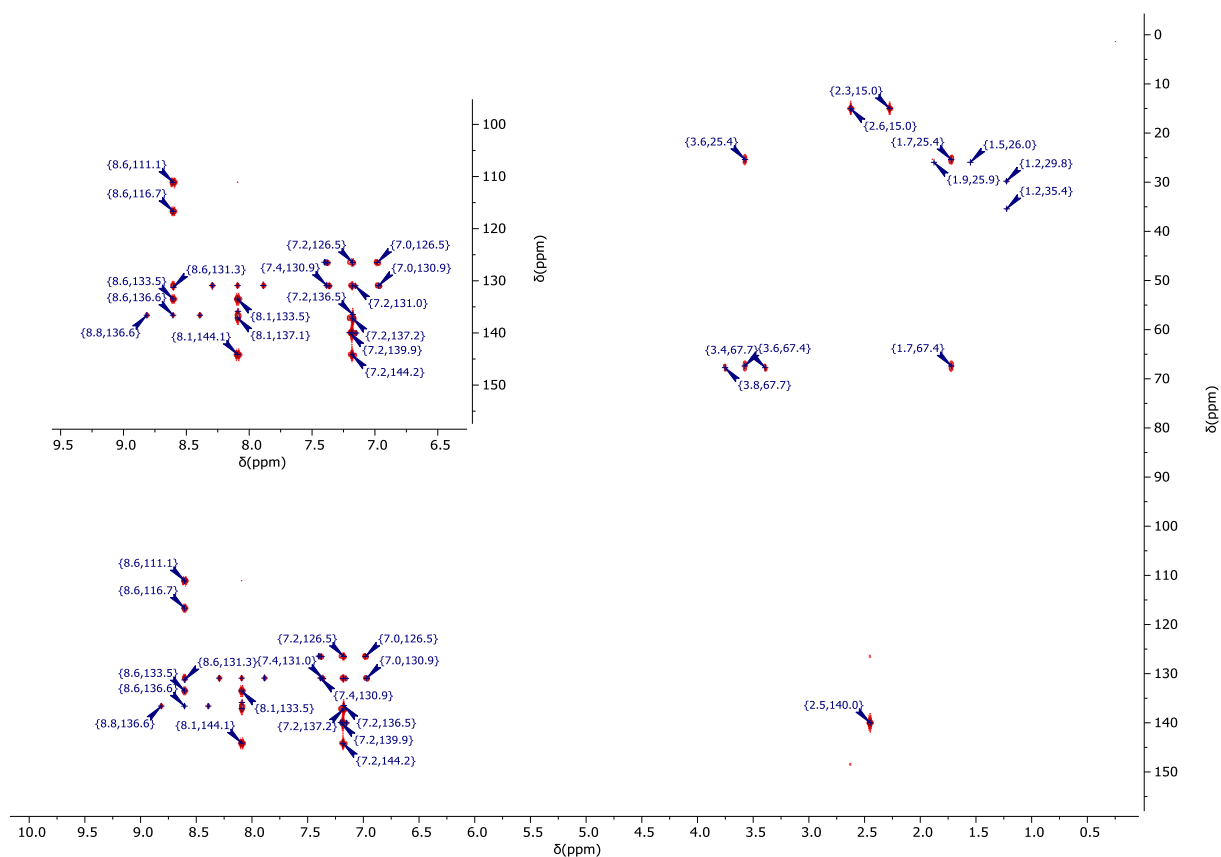

**Figure S20:**  $^1\text{H}/^{13}\text{C}$  gHMBC NMR spectrum (400 MHz/101 MHz,  $\text{THF-}d_8$ ) of 6,7-bis(4-(methylthio)phenyl)naphthalene-2,3-dicarbonitrile (**SMe**).

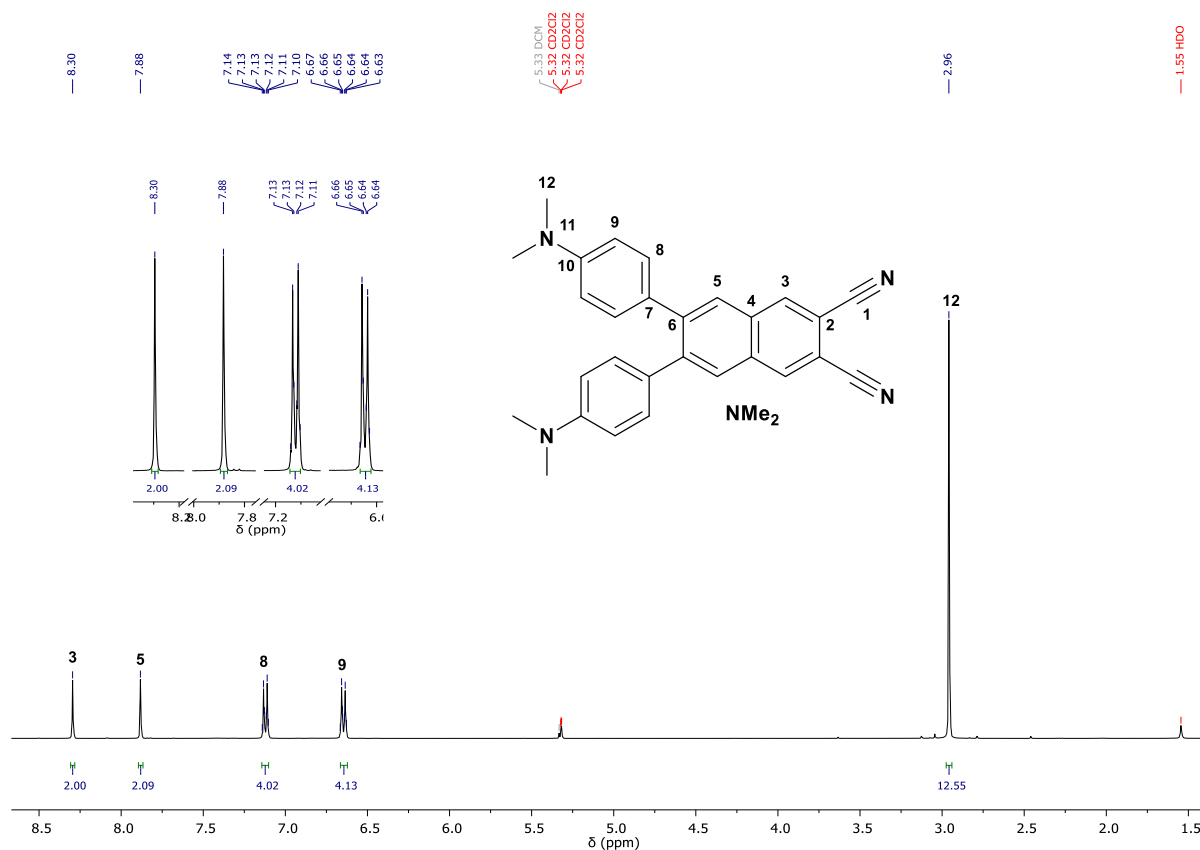

**Figure S21:**  $^1\text{H}$  NMR spectrum (500 MHz,  $\text{DCM-d}_2$ ) of 6,7-bis(4-(dimethylamino)phenyl)naphthalene-2,3-dicarbonitrile (**NMe<sub>2</sub>**).

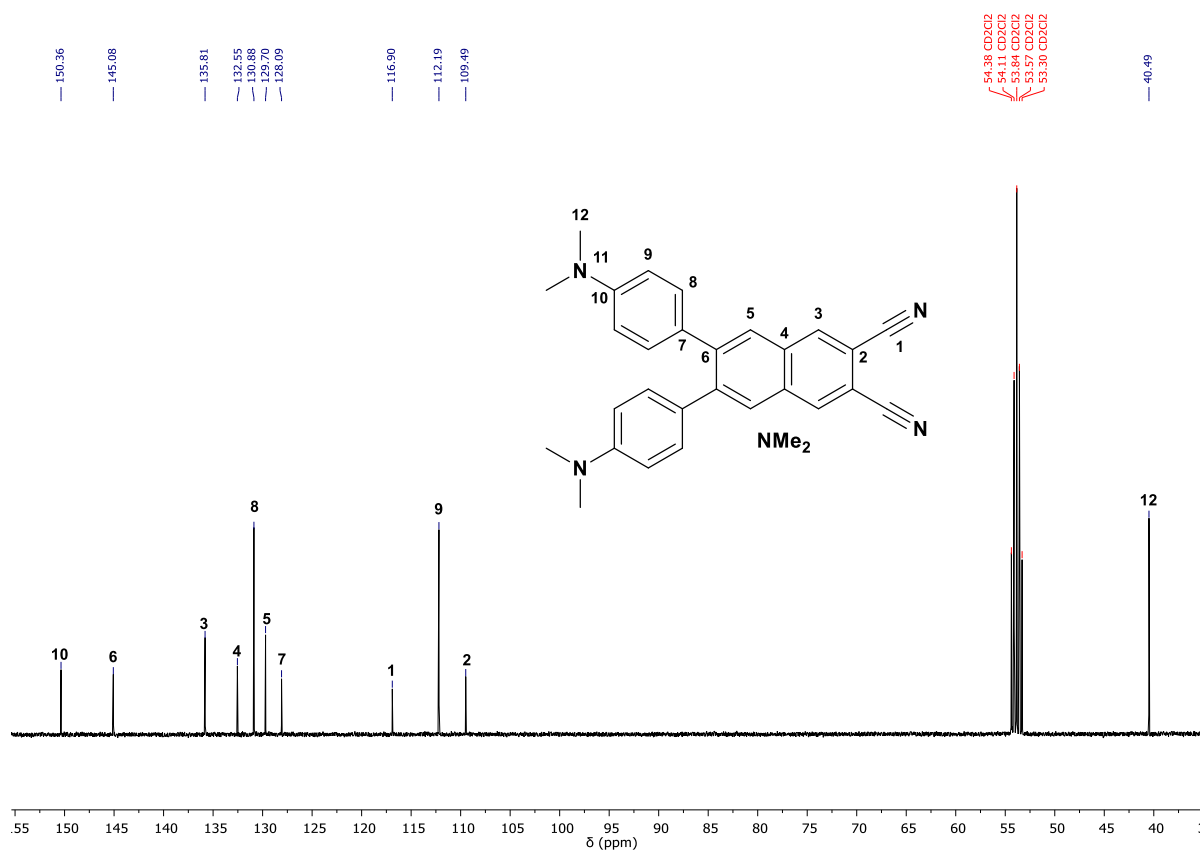

**Figure S22:**  $^{13}\text{C}$  { $^1\text{H}$ } NMR spectrum (126 MHz,  $\text{DCM-d}_2$ ) of 6,7-bis(4-(dimethylamino)phenyl)naphthalene-2,3-dicarbonitrile (**NMe<sub>2</sub>**).

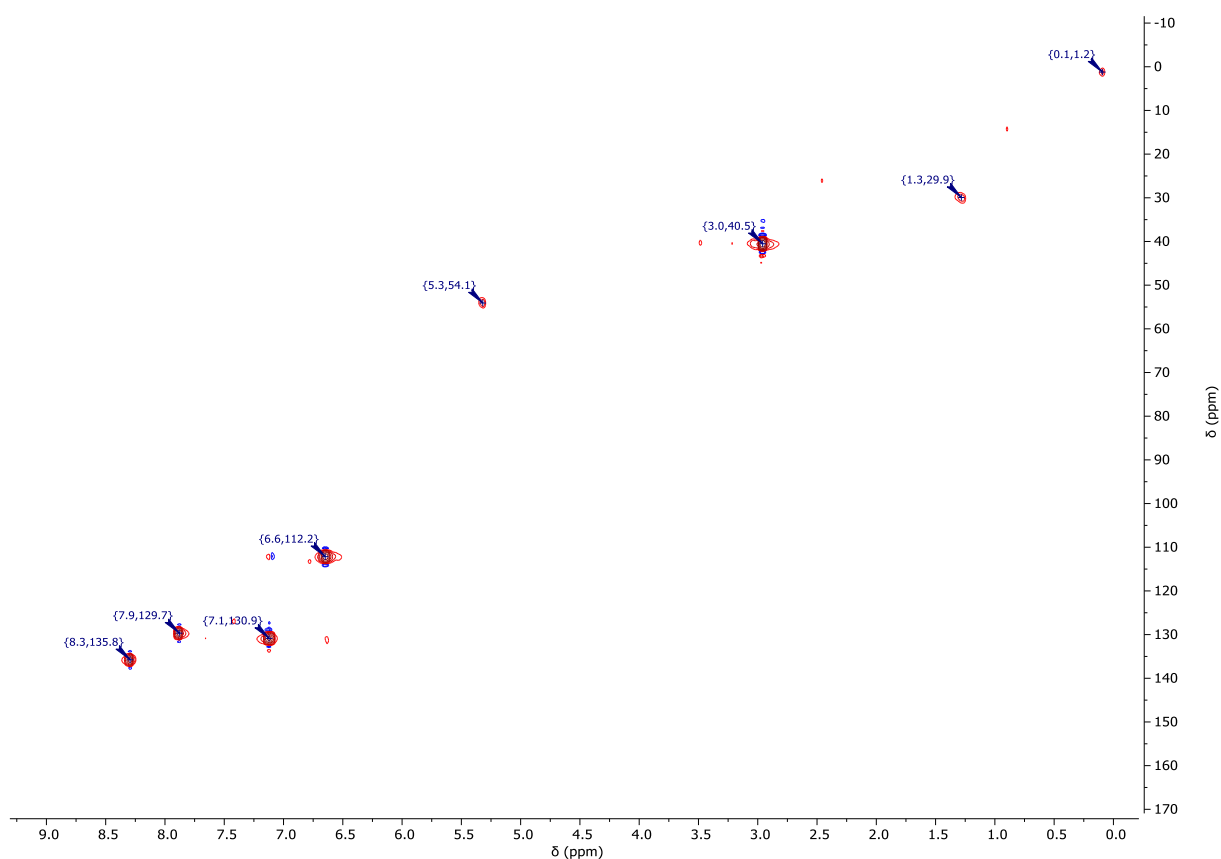

**Figure S23:**  $^1\text{H}/^{13}\text{C}$  gHSQC NMR spectrum (400 MHz/101 MHz,  $\text{DCM}-d_2$ ) of 6,7-bis(4-(dimethylamino)phenyl)naphthalene-2,3-dicarbonitrile (**NMe<sub>2</sub>**).

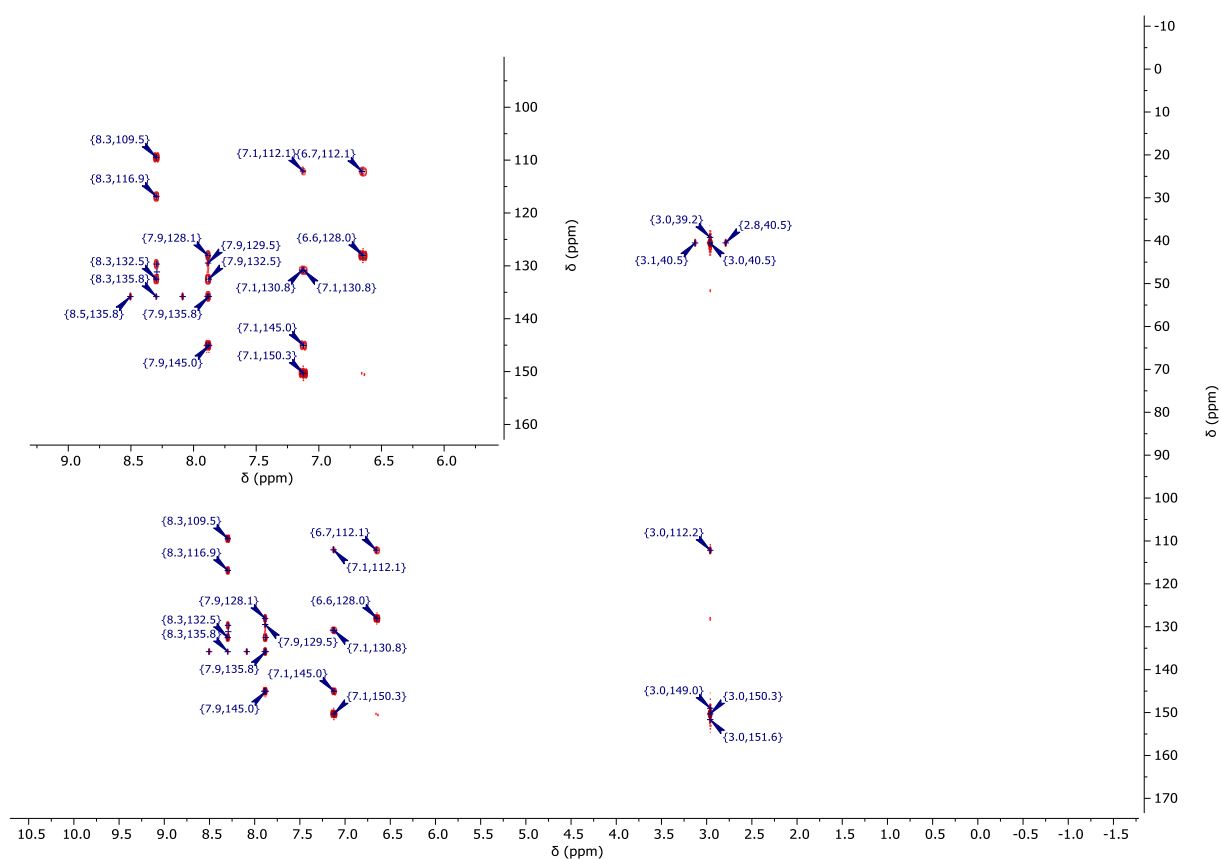

**Figure S24:**  $^1\text{H}/^{13}\text{C}$  gHMBC NMR spectrum (400 MHz/101 MHz,  $\text{DCM}-d_2$ ) of 6,7-bis(4-(dimethylamino)phenyl)naphthalene-2,3-dicarbonitrile (**NMe<sub>2</sub>**).

## Section S4: Mass spectra of H, Me, *t*-Bu, OMe, SMe & NMe<sub>2</sub>

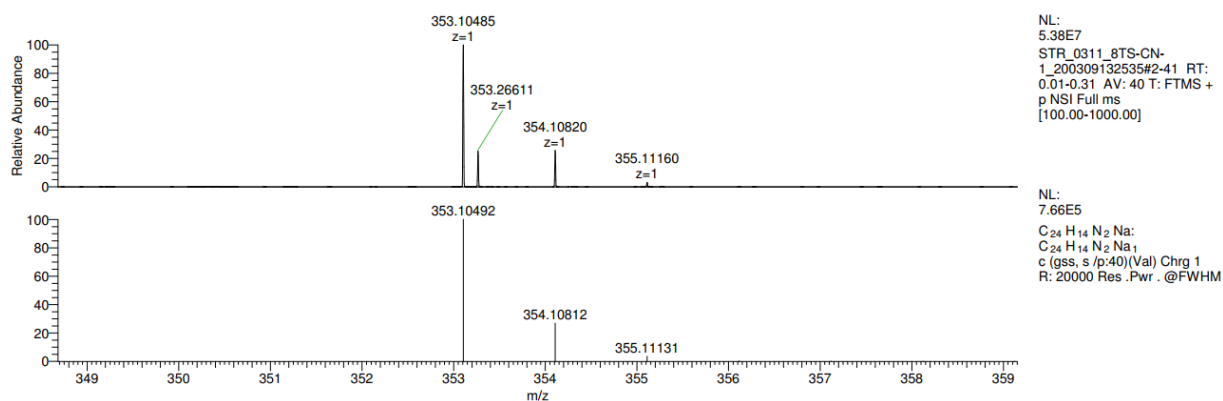

Figure S25: EM-ESI-MS spectrum of **H**.

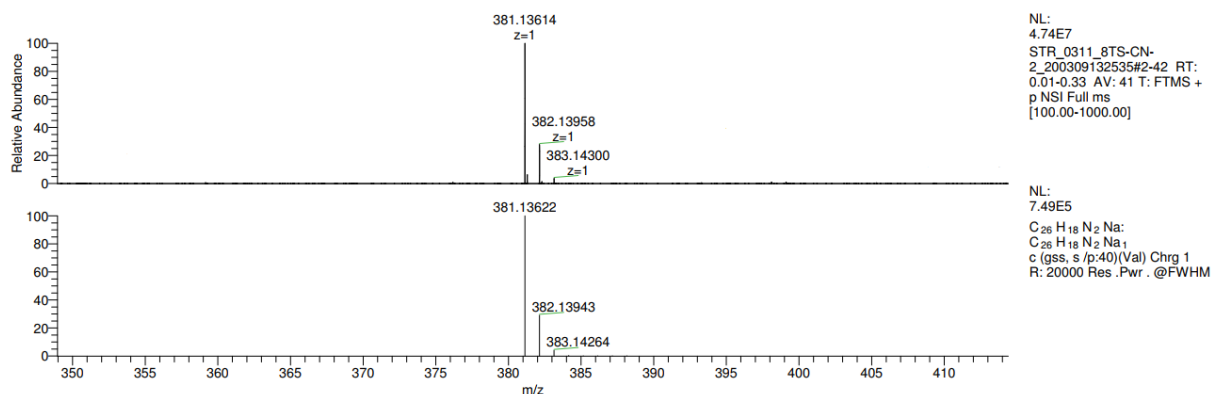

Figure S26: EM-ESI-MS spectrum of **Me**.

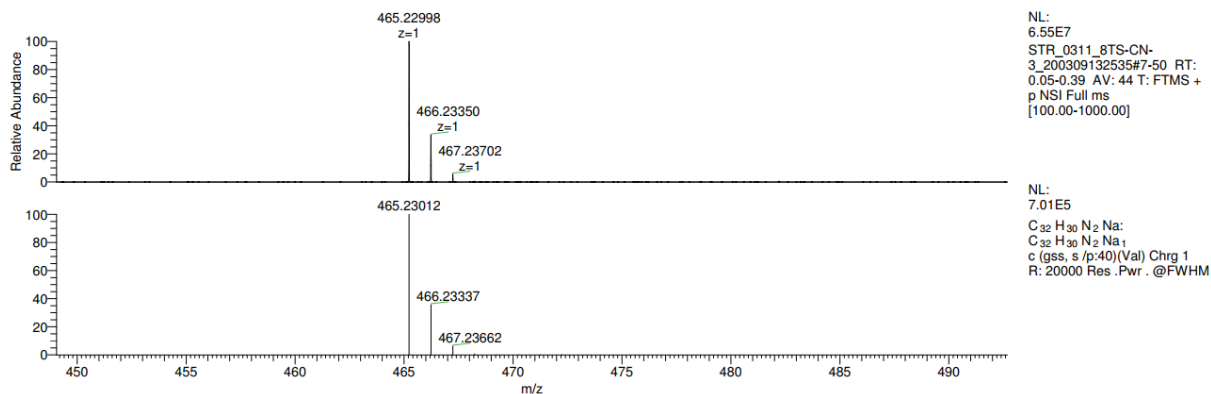

Figure S27: EM-ESI-MS spectrum of ***t*-Bu**.



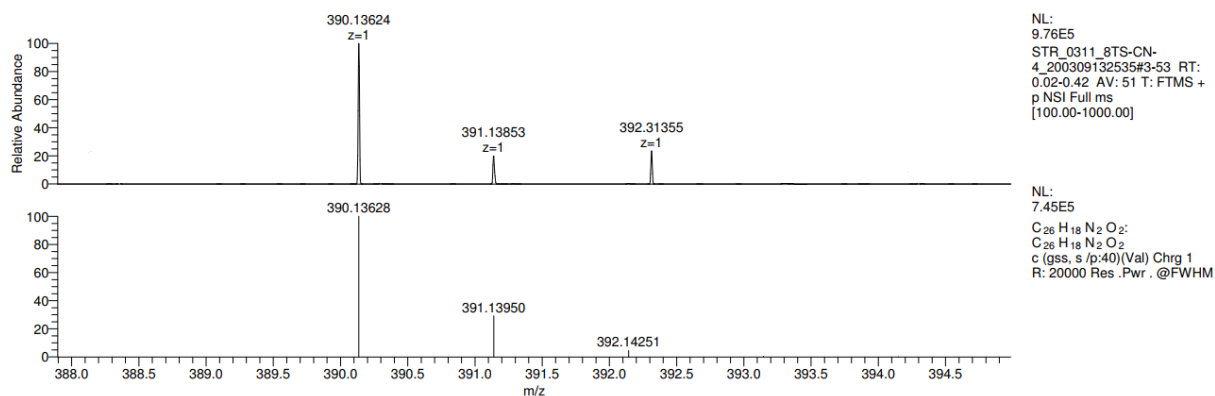

**Figure S28:** EM-ESI-MS spectrum of **OMe**.

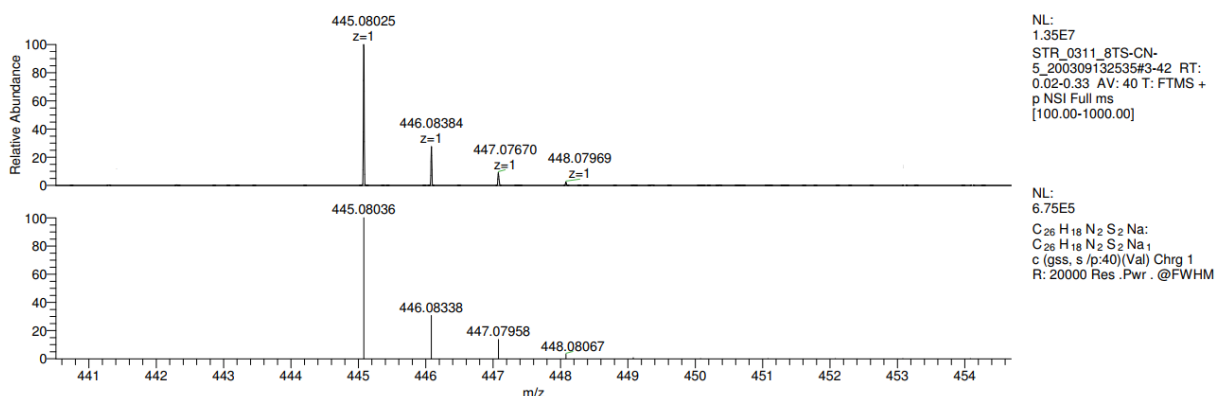

**Figure S29:** EM-ESI-MS spectrum of **SMe**.

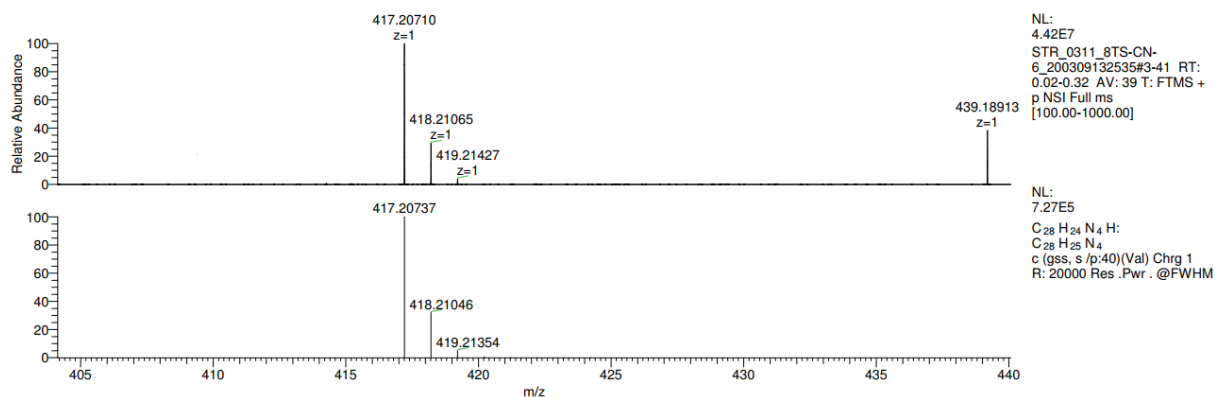

**Figure S30:** EM-ESI-MS spectrum of **NMe<sub>2</sub>**.

## Section S5: Single crystal X-ray diffraction analysis of Me

The crystals were mounted on nylon loops in inert oil. Data were collected on a Bruker AXS D8 Kappa diffractometer with APEX2 detector (mono-chromated MoK $\alpha$  radiation,  $\lambda = 0.71073 \text{ \AA}$ ) at 100(2) K. The structures were solved by Direct Methods (SHELXS-97)[4] and refined anisotropically by full-matrix least-squares on F<sup>2</sup> (SHELXL-2014)[5–7]. Absorption corrections were performed semi-empirically from equivalent reflections on basis of multi-scans (Bruker AXS APEX2). Hydrogen atoms were refined using a riding model or rigid methyl groups. The crystallographic data (without structure factors) was deposited as CCDC-2021602 at the Cambridge Crystallographic Data Centre.

|                                                |                                                                    |
|------------------------------------------------|--------------------------------------------------------------------|
| Identification code                            | Me                                                                 |
| Empirical formula                              | C <sub>26</sub> H <sub>18</sub> N <sub>2</sub>                     |
| Formula weight                                 | 358.42                                                             |
| Temperature/K                                  | 100(2)                                                             |
| Crystal system                                 | monoclinic                                                         |
| Space group                                    | C2/c                                                               |
| a/ $\text{\AA}$                                | 21.1827(9)                                                         |
| b/ $\text{\AA}$                                | 12.0049(5)                                                         |
| c/ $\text{\AA}$                                | 15.2487(7)                                                         |
| $\alpha/^\circ$                                | 90                                                                 |
| $\beta/^\circ$                                 | 94.9610(10)                                                        |
| $\gamma/^\circ$                                | 90                                                                 |
| Volume/ $\text{\AA}^3$                         | 3863.2(3)                                                          |
| Z                                              | 8                                                                  |
| $\rho_{\text{calc}}/\text{g cm}^{-3}$          | 1.233                                                              |
| $\mu/\text{mm}^{-1}$                           | 0.072                                                              |
| F(000)                                         | 1504.0                                                             |
| Crystal size/ $\text{mm}^3$                    | 0.583 $\times$ 0.501 $\times$ 0.243                                |
| Radiation                                      | MoK $\alpha$ ( $\lambda = 0.71073$ )                               |
| 2 $\theta$ range for data collection/ $^\circ$ | 3.904 to 55.75                                                     |
| Index ranges                                   | $-27 \leq h \leq 27$ , $-15 \leq k \leq 15$ , $-20 \leq l \leq 20$ |
| Reflections collected                          | 24261                                                              |
| Independent reflections                        | 4606 [ $R_{\text{int}} = 0.0327$ , $R_{\text{sigma}} = 0.0276$ ]   |
| Data/restraints/parameters                     | 4606/0/255                                                         |
| Goodness-of-fit on $F^2$                       | 1.034                                                              |
| Final R indexes [ $ I  > 2\sigma(I)$ ]         | $R_1 = 0.0470$ , $wR_2 = 0.1317$                                   |
| Final R indexes [all data]                     | $R_1 = 0.0517$ , $wR_2 = 0.1357$                                   |
| Largest diff. peak/hole / $e \text{ \AA}^{-3}$ | 0.28/-0.27                                                         |

**Table S1:** Crystal data and structure refinement for Me.

| Atom | Atom | Length/Å   |  | Atom | Atom | Length/Å   |
|------|------|------------|--|------|------|------------|
| C1   | C006 | 1.3763(16) |  | C12  | C13  | 1.3991(16) |
| C1   | C2   | 1.4387(16) |  | C12  | C17  | 1.4000(15) |
| C1   | C19  | 1.4907(15) |  | C13  | C14  | 1.3845(18) |
| C2   | C3   | 1.3824(15) |  | C14  | C15  | 1.3944(18) |
| C2   | C12  | 1.4852(16) |  | C15  | C16  | 1.3940(16) |
| N2   | C10  | 1.1455(18) |  | C15  | C18  | 1.5046(17) |
| C4   | C3   | 1.4133(17) |  | C16  | C17  | 1.3858(16) |
| C4   | C6   | 1.4168(15) |  | C19  | C20  | 1.3927(17) |
| C4   | C5   | 1.4193(17) |  | C19  | C24  | 1.3965(16) |
| C5   | C006 | 1.4121(15) |  | C20  | C21  | 1.3887(15) |
| C5   | C9   | 1.4135(17) |  | C21  | C22  | 1.3931(18) |
| C6   | C7   | 1.3713(18) |  | C22  | C23  | 1.3890(19) |
| C7   | C8   | 1.4304(18) |  | C22  | C25  | 1.5118(16) |
| C7   | C10  | 1.4414(16) |  | C23  | C24  | 1.3898(16) |
| C8   | C9   | 1.3730(16) |  | C19  | C24  | 1.3965(16) |
| C8   | C11  | 1.4361(18) |  | C20  | C21  | 1.3887(15) |

**Table S2:** Bond Lengths for **Me**.

| Atom | Atom | Atom | Angle/°    |  | Atom | Atom | Atom | Angle/°    |
|------|------|------|------------|--|------|------|------|------------|
| C006 | C1   | C2   | 119.44(10) |  | N2   | C10  | C7   | 178.74(15) |
| C006 | C1   | C19  | 116.68(10) |  | N1   | C11  | C8   | 179.41(15) |
| C2   | C1   | C19  | 123.82(10) |  | C13  | C12  | C17  | 117.84(11) |
| C3   | C2   | C1   | 118.74(11) |  | C13  | C12  | C2   | 119.77(10) |
| C3   | C2   | C12  | 117.78(10) |  | C17  | C12  | C2   | 122.21(10) |
| C1   | C2   | C12  | 123.44(10) |  | C14  | C13  | C12  | 121.05(10) |
| C3   | C4   | C6   | 122.03(11) |  | C13  | C14  | C15  | 121.26(11) |
| C3   | C4   | C5   | 118.82(10) |  | C16  | C15  | C14  | 117.59(11) |
| C6   | C4   | C5   | 119.14(11) |  | C16  | C15  | C18  | 121.29(11) |
| C2   | C3   | C4   | 122.13(11) |  | C14  | C15  | C18  | 121.11(11) |
| C006 | C5   | C4   | 118.76(11) |  | C17  | C16  | C15  | 121.65(10) |
| C9   | C5   | C4   | 119.69(10) |  | C16  | C17  | C12  | 120.59(10) |
| C1   | C006 | C5   | 122.05(11) |  | C20  | C19  | C24  | 118.13(10) |
| C7   | C6   | C4   | 120.48(11) |  | C20  | C19  | C1   | 121.72(10) |
| C6   | C7   | C8   | 120.26(11) |  | C24  | C19  | C1   | 119.97(10) |
| C6   | C7   | C10  | 120.40(12) |  | C21  | C20  | C19  | 120.78(11) |
| C8   | C7   | C10  | 119.31(12) |  | C20  | C21  | C22  | 121.19(12) |
| C9   | C8   | C7   | 120.07(11) |  | C23  | C22  | C21  | 117.95(11) |
| C9   | C8   | C11  | 119.94(12) |  | C21  | C22  | C25  | 121.08(12) |
| C7   | C8   | C11  | 119.99(11) |  | C22  | C23  | C24  | 121.20(12) |
| C8   | C9   | C5   | 120.36(11) |  | C23  | C24  | C19  | 120.73(12) |

**Table S3:** Bond Angles for **Me**.

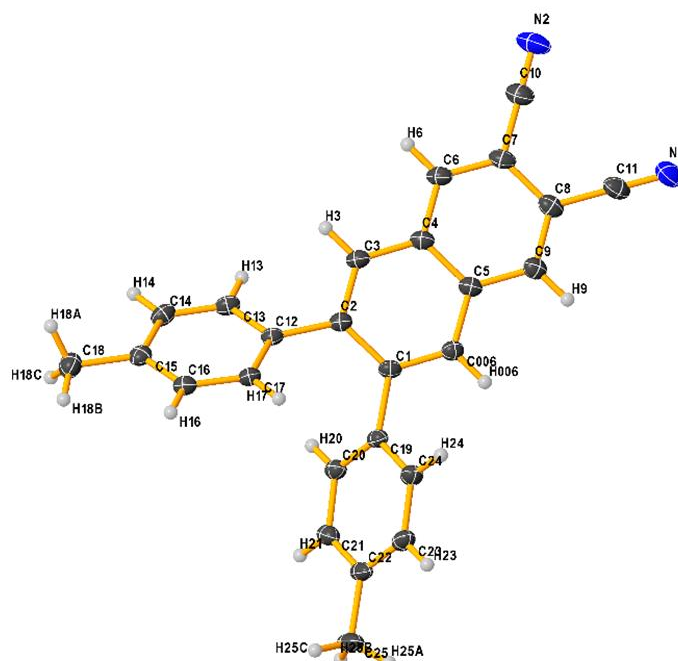

**Figure S31:** Molecular structure in the crystal of **Me** as obtained by X-ray diffractometric analysis. Thermal displacement ellipsoids are shown with 50% probability. Color code: black = carbon, grey = hydrogen and blue = nitrogen.

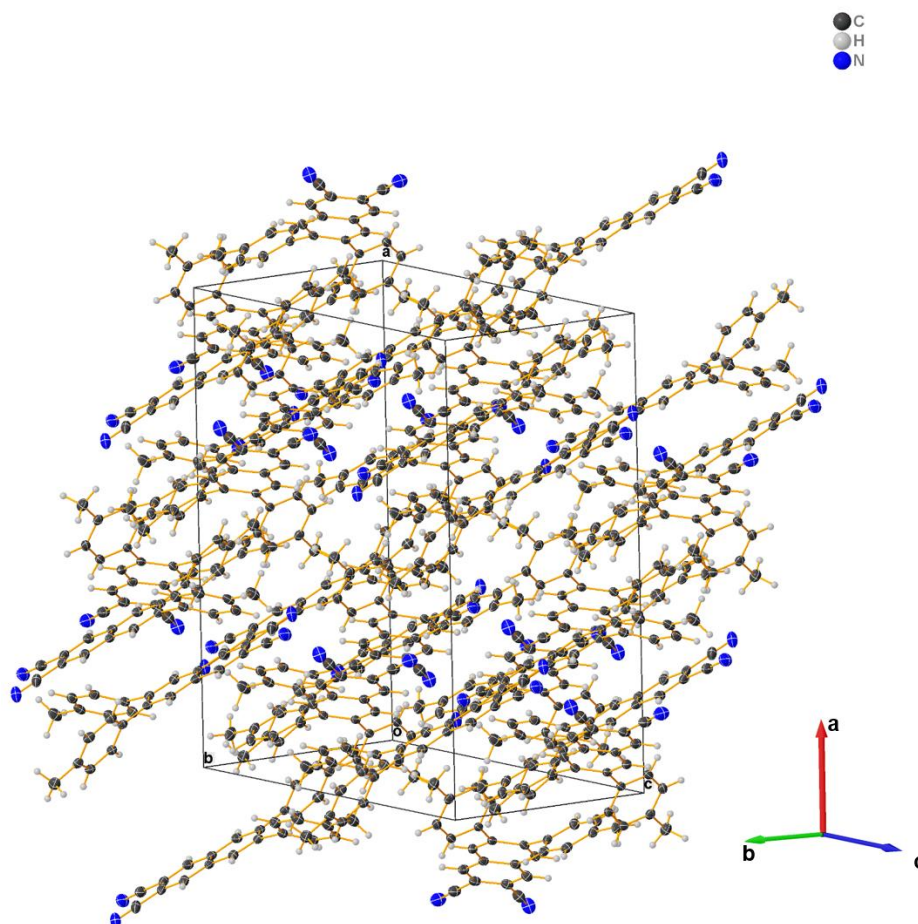

**Figure S32:** Unit cell of **Me**. Color code: black = carbon, grey = hydrogen and blue = nitrogen.

## Section S6: Photophysical characterization of H, Me, *t*-Bu, OMe, SMe & NMe<sub>2</sub> and aggregation studies

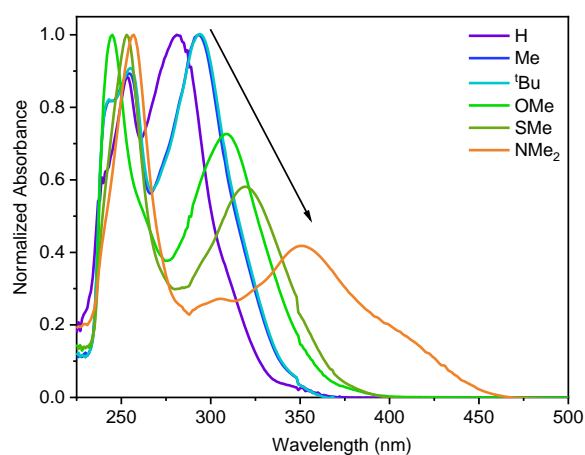

**Figure S33:** Normalized UV-vis absorption spectra of all the naphthalonitriles in THF at 298 K.

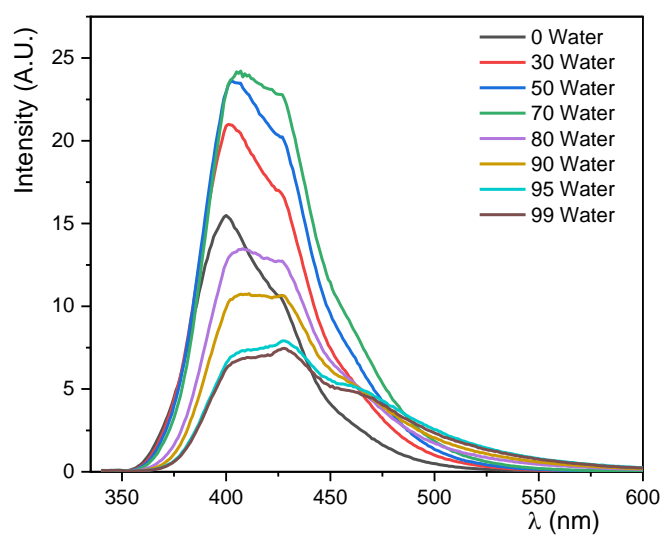

**Figure S34:** Emission spectra of **H** in different THF/water mixtures ( $\lambda_{\text{ex}} = 320$  nm).

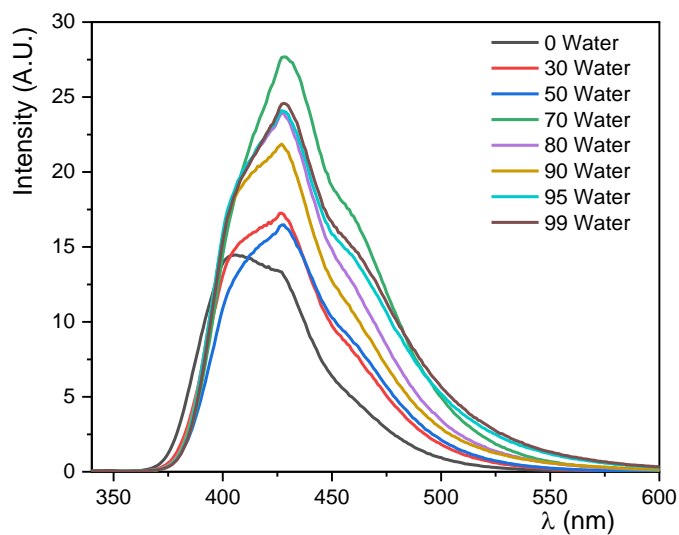

**Figure S35:** Emission spectra of **Me** in different THF/water mixtures ( $\lambda_{\text{ex}} = 320$  nm).

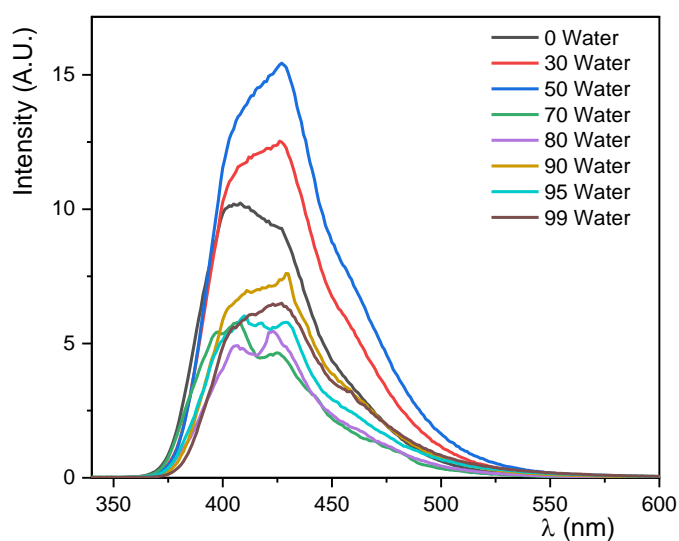

**Figure S36:** Emission spectra of **t-Bu** in different THF/water mixtures ( $\lambda_{\text{ex}} = 320$  nm).

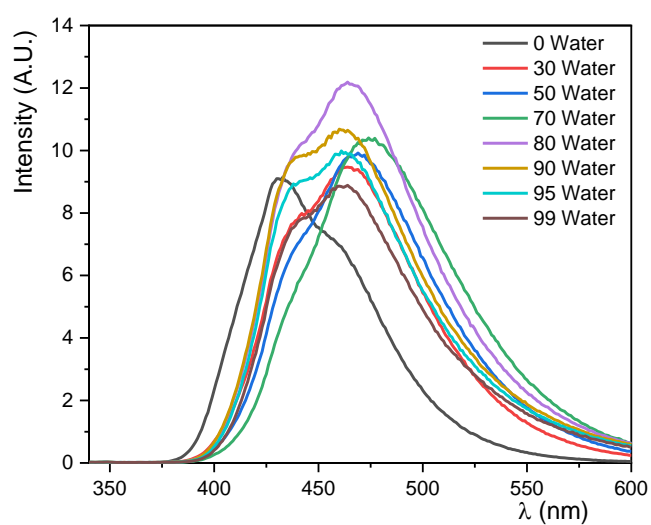

**Figure S37:** Emission spectra of **OMe** in different THF/water mixtures ( $\lambda_{\text{ex}} = 340$  nm).

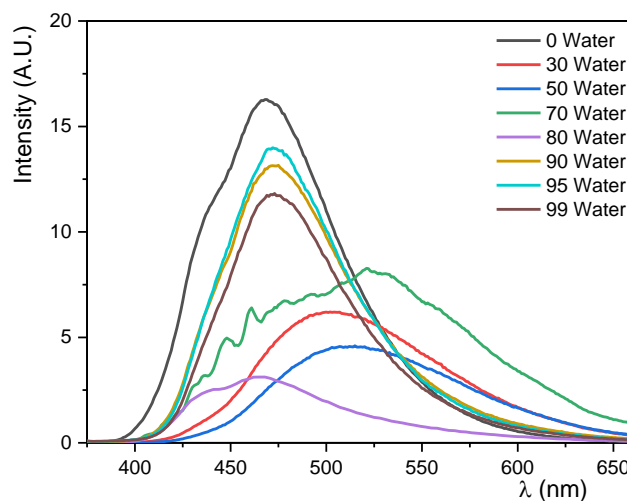

**Figure S38:** Emission spectra of **SMe** in different THF/water mixtures ( $\lambda_{\text{ex}} = 350$  nm).

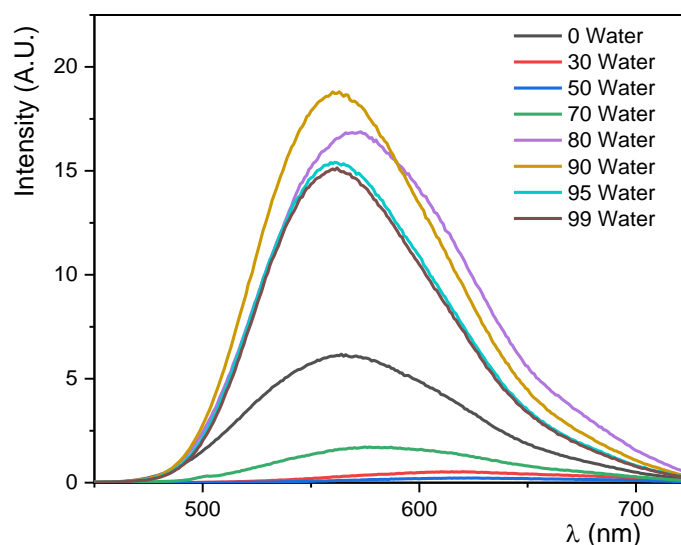

**Figure S39:** Emission spectra of **NMe<sub>2</sub>** in different THF/water mixtures ( $\lambda_{\text{ex}} = 350$  nm).

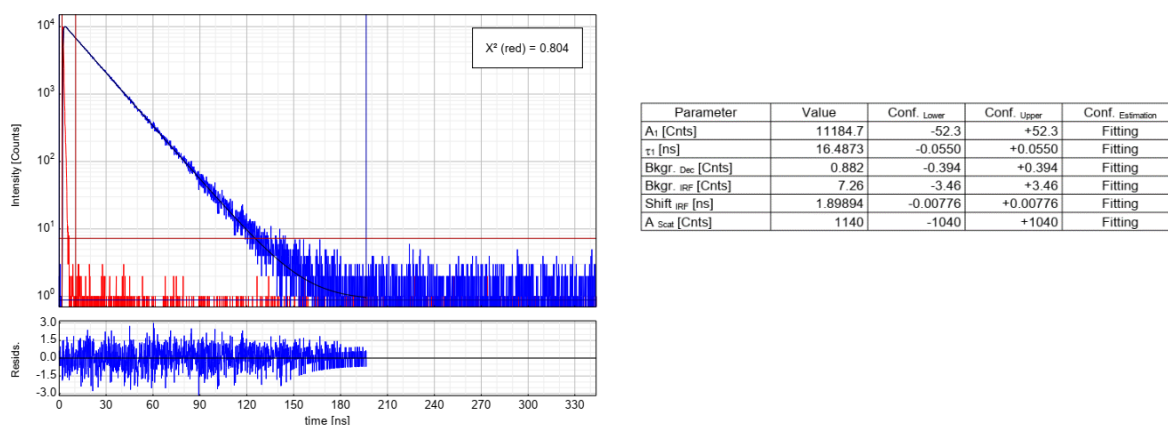

**Figure S40:** Left: Time-resolved photoluminescence decay of **H** (blue) at 298 K (air-equilibrated) in a THF solution, including the residuals ( $\lambda_{\text{exc}} = 325$  nm,  $\lambda_{\text{em}} = 420$  nm) and the instrument response function (red). Right: Fitting parameters including pre-exponential factors and confidence limits.

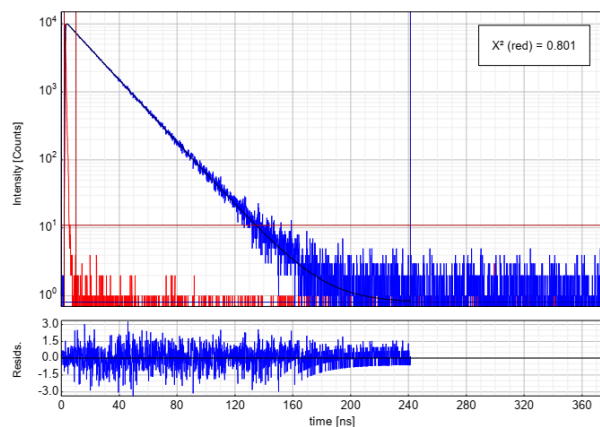

| Parameter        | Value   | Conf. Lower | Conf. Upper | Conf. Estimation |
|------------------|---------|-------------|-------------|------------------|
| $A_1$ [Cnts]     | 11046.8 | -53.8       | +53.8       | Fitting          |
| $\tau_1$ [ns]    | 18.9155 | -0.0660     | +0.0660     | Fitting          |
| Bkgr. Dec [Cnts] | 0.809   | -0.363      | +0.363      | Fitting          |
| Bkgr. IRF [Cnts] | 10.94   | -4.00       | +4.00       | Fitting          |
| Shift IRF [ns]   | 2.01551 | -0.00936    | +0.00936    | Fitting          |
| A Scat [Cnts]    | 3410    | -1220       | +1220       | Fitting          |

**Figure S41:** Left: Time-resolved photoluminescence decay of **H** (blue) at 298 K (air-equilibrated) in a THF/water mixture (70/30), including the residuals ( $\lambda_{\text{exc}} = 325$  nm,  $\lambda_{\text{em}} = 420$  nm) and the instrument response function (red). Right: Fitting parameters including pre-exponential factors and confidence limits.

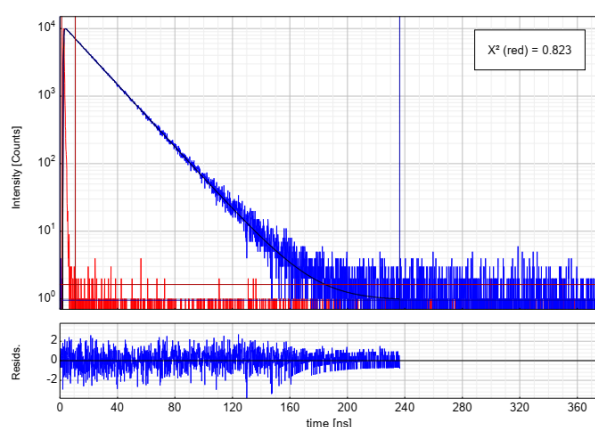

| Parameter        | Value   | Conf. Lower | Conf. Upper | Conf. Estimation |
|------------------|---------|-------------|-------------|------------------|
| $A_1$ [Cnts]     | 10921.6 | -53.5       | +53.5       | Fitting          |
| $\tau_1$ [ns]    | 18.8005 | -0.0662     | +0.0662     | Fitting          |
| Bkgr. Dec [Cnts] | 0.952   | -0.379      | +0.379      | Fitting          |
| Bkgr. IRF [Cnts] | 1.63    | -2.56       | +2.56       | Fitting          |
| Shift IRF [ns]   | 0.99214 | -0.00929    | +0.00929    | Fitting          |
| A Scat [Cnts]    | 2150    | -1170       | +1170       | Fitting          |

**Figure S42:** Left: Time-resolved photoluminescence decay of **H** (blue) at 298 K (air-equilibrated) in a THF/water mixture (50/50), including the residuals ( $\lambda_{\text{exc}} = 325$  nm,  $\lambda_{\text{em}} = 420$  nm) and the instrument response function (red). Right: Fitting parameters including pre-exponential factors and confidence limits.

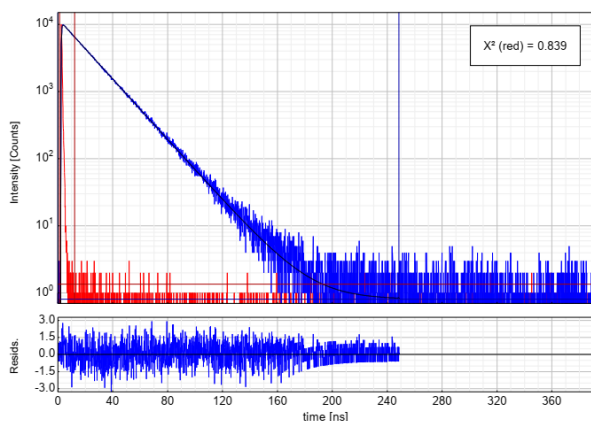

| Parameter        | Value   | Conf. Lower | Conf. Upper | Conf. Estimation |
|------------------|---------|-------------|-------------|------------------|
| $A_1$ [Cnts]     | 10750.7 | -54.3       | +54.3       | Fitting          |
| $\tau_1$ [ns]    | 19.2629 | -0.0698     | +0.0698     | Fitting          |
| Bkgr. Dec [Cnts] | 0.810   | -0.366      | +0.366      | Fitting          |
| Bkgr. IRF [Cnts] | 1.35    | -2.38       | +2.38       | Fitting          |
| Shift IRF [ns]   | 0.09477 | -0.00982    | +0.00982    | Fitting          |
| A Scat [Cnts]    | 2190    | -1210       | +1210       | Fitting          |

**Figure S43:** Left: Time-resolved photoluminescence decay of **H** (blue) at 298 K (air-equilibrated) in a THF/water mixture (30/70), including the residuals ( $\lambda_{\text{exc}} = 325$  nm,  $\lambda_{\text{em}} = 420$  nm) and the instrument response function (red). Right: Fitting parameters including pre-exponential factors and confidence limits.



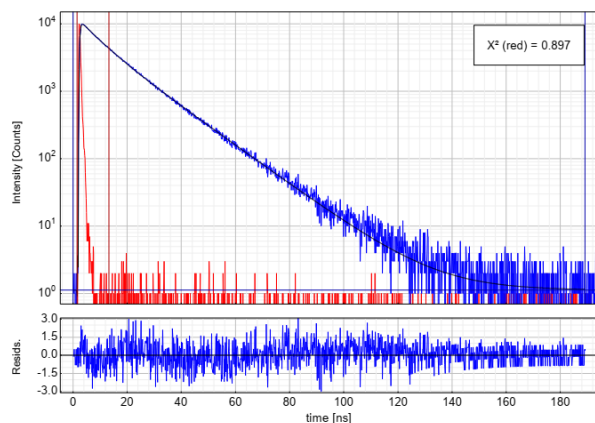

| Parameter                | Value   | Conf. Lower | Conf. Upper | Conf. Estimation |
|--------------------------|---------|-------------|-------------|------------------|
| A <sub>1</sub> [Cnts]    | 7121.9  | -49.0       | +49.0       | Fitting          |
| τ <sub>1</sub> [ns]      | 15.0513 | -0.0693     | +0.0693     | Fitting          |
| A <sub>2</sub> [Cnts]    | 4414    | -101        | +101        | Fitting          |
| τ <sub>2</sub> [ns]      | 6.244   | -0.153      | +0.153      | Fitting          |
| Bkgr. Dec [Cnts]         | 1.129   | -0.386      | +0.386      | Fitting          |
| Bkgr. RF [Cnts]          | -10.32  | -2.98       | +2.98       | Fitting          |
| Shift RF [ns]            | 1.47184 | -0.00994    | +0.00994    | Fitting          |
| A <sub>Scat</sub> [Cnts] | -12462  | -455        | +455        | Fitting          |

Average Lifetime:

$$\tau_{Av,1} = 13.2500 \text{ ns (intensity weighted)}$$

$$\tau_{Av,2} = 11.6814 \text{ ns (amplitude weighted)}$$

**Figure S44:** Left: Time-resolved photoluminescence decay of **H** (blue) at 298 K (air-equilibrated) in a THF/water mixture (20/80), including the residuals ( $\lambda_{exc} = 325 \text{ nm}$ ,  $\lambda_{em} = 420 \text{ nm}$ ) and the instrument response function (red). Right: Fitting parameters including pre-exponential factors and confidence limits.

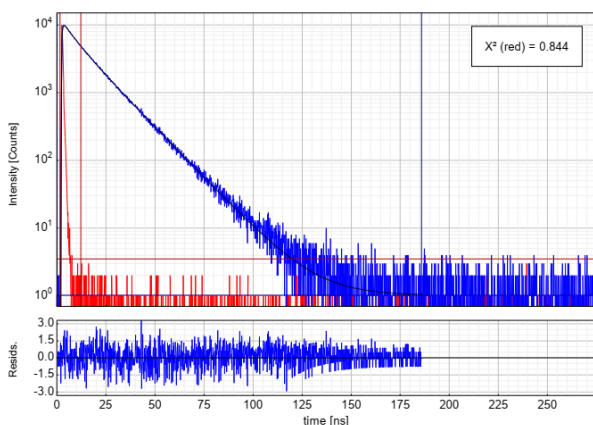

| Parameter                | Value   | Conf. Lower | Conf. Upper | Conf. Estimation |
|--------------------------|---------|-------------|-------------|------------------|
| A <sub>1</sub> [Cnts]    | 8165.5  | -50.8       | +50.8       | Fitting          |
| τ <sub>1</sub> [ns]      | 14.5009 | -0.0610     | +0.0610     | Fitting          |
| A <sub>2</sub> [Cnts]    | 3167    | -103        | +103        | Fitting          |
| τ <sub>2</sub> [ns]      | 6.217   | -0.211      | +0.211      | Fitting          |
| Bkgr. Dec [Cnts]         | 1.026   | -0.369      | +0.369      | Fitting          |
| Bkgr. RF [Cnts]          | 3.51    | -3.08       | +3.08       | Fitting          |
| Shift RF [ns]            | 1.63493 | -0.00812    | +0.00812    | Fitting          |
| A <sub>Scat</sub> [Cnts] | 3180    | -1100       | +1100       | Fitting          |

Average Lifetime:

$$\tau_{Av,1} = 13.3199 \text{ ns (intensity weighted)}$$

$$\tau_{Av,2} = 12.1860 \text{ ns (amplitude weighted)}$$

**Figure S45:** Left: Time-resolved photoluminescence decay of **H** (blue) at 298 K (air-equilibrated) in a THF/water mixture (10/90), including the residuals ( $\lambda_{exc} = 325 \text{ nm}$ ,  $\lambda_{em} = 420 \text{ nm}$ ) and the instrument response function (red). Right: Fitting parameters including pre-exponential factors and confidence limits.

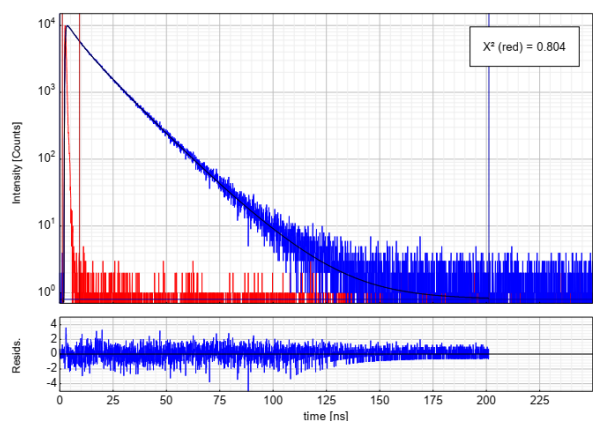

| Parameter                | Value   | Conf. Lower | Conf. Upper | Conf. Estimation |
|--------------------------|---------|-------------|-------------|------------------|
| A <sub>1</sub> [Cnts]    | 589.8   | -30.9       | +30.9       | Fitting          |
| τ <sub>1</sub> [ns]      | 20.189  | -0.529      | +0.529      | Fitting          |
| A <sub>2</sub> [Cnts]    | 7757.3  | -56.1       | +56.1       | Fitting          |
| τ <sub>2</sub> [ns]      | 12.7070 | -0.0658     | +0.0658     | Fitting          |
| A <sub>3</sub> [Cnts]    | 3222    | -125        | +125        | Fitting          |
| τ <sub>3</sub> [ns]      | 4.630   | -0.196      | +0.196      | Fitting          |
| Bkgr. Dec [Cnts]         | 0.804   | -0.333      | +0.333      | Fitting          |
| Bkgr. RF [Cnts]          | 0.170   | -2.30       | +2.30       | Fitting          |
| Shift RF [ns]            | 0.12157 | -0.00828    | +0.00828    | Fitting          |
| A <sub>Scat</sub> [Cnts] | 5640    | -2060       | +2060       | Fitting          |

Average Lifetime:

$$\tau_{Av,1} = 12.457 \text{ ns (intensity weighted)}$$

$$\tau_{Av,2} = 10.839 \text{ ns (amplitude weighted)}$$

**Figure S46:** Left: Time-resolved photoluminescence decay of **H** (blue) at 298 K (air-equilibrated) in a THF/water mixture (5/95), including the residuals ( $\lambda_{exc} = 325 \text{ nm}$ ,  $\lambda_{em} = 420 \text{ nm}$ ) and the instrument response function (red). Right: Fitting parameters including pre-exponential factors and confidence limits.

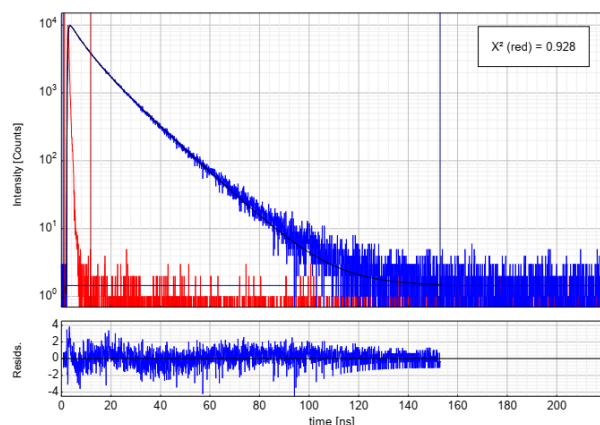

| Parameter                | Value   | Conf. Lower | Conf. Upper | Conf. Estimation |
|--------------------------|---------|-------------|-------------|------------------|
| A <sub>1</sub> [Cnts]    | 5752.4  | -46.3       | +46.3       | Fitting          |
| τ <sub>1</sub> [ns]      | 12.8762 | -0.0664     | +0.0664     | Fitting          |
| A <sub>2</sub> [Cnts]    | 5801    | -105        | +105        | Fitting          |
| τ <sub>2</sub> [ns]      | 5.1528  | -0.0934     | +0.0934     | Fitting          |
| Bkgr. Dec [Cnts]         | 1.455   | -0.424      | +0.424      | Fitting          |
| Bkgr. IRF [Cnts]         | 0.412   | -2.89       | +2.89       | Fitting          |
| Shift IRF [ns]           | 1.03339 | -0.00941    | +0.00941    | Fitting          |
| A <sub>Scat</sub> [Cnts] | 11740   | -2040       | +2040       | Fitting          |

Average Lifetime:

$$\tau_{Av,1} = 10.6555 \text{ ns (intensity weighted)}$$

$$\tau_{Av,2} = 8.9982 \text{ ns (amplitude weighted)}$$

**Figure S47:** Left: Time-resolved photoluminescence decay of **H** (blue) at 298 K (air-equilibrated) in a THF/water mixture (1/99), including the residuals ( $\lambda_{exc} = 325 \text{ nm}$ ,  $\lambda_{em} = 420 \text{ nm}$ ) and the instrument response function (red). Right: Fitting parameters including pre-exponential factors and confidence limits.

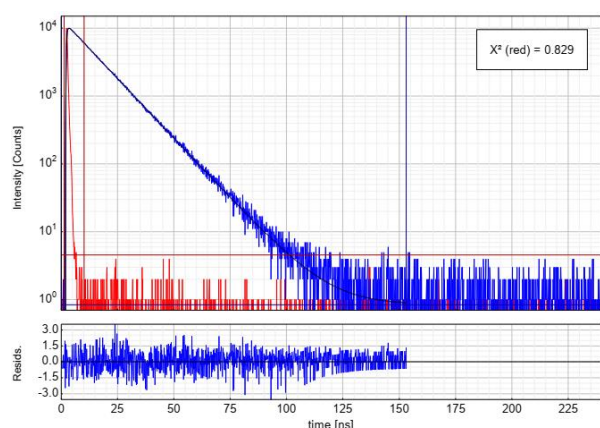

| Parameter                | Value   | Conf. Lower | Conf. Upper | Conf. Estimation |
|--------------------------|---------|-------------|-------------|------------------|
| A <sub>1</sub> [Cnts]    | 11418.3 | -54.7       | +54.7       | Fitting          |
| τ <sub>1</sub> [ns]      | 12.3311 | -0.0421     | +0.0421     | Fitting          |
| Bkgr. Dec [Cnts]         | 0.842   | -0.386      | +0.386      | Fitting          |
| Bkgr. IRF [Cnts]         | 4.56    | -3.12       | +3.12       | Fitting          |
| Shift IRF [ns]           | 0.35496 | -0.00713    | +0.00713    | Fitting          |
| A <sub>Scat</sub> [Cnts] | 4400    | -1020       | +1020       | Fitting          |

**Figure S48:** Left: Time-resolved photoluminescence decay of **Me** (blue) at 298 K (air-equilibrated) in a THF solution, including the residuals ( $\lambda_{exc} = 325 \text{ nm}$ ,  $\lambda_{em} = 430 \text{ nm}$ ) and the instrument response function (red). Right: Fitting parameters including pre-exponential factors and confidence limits.

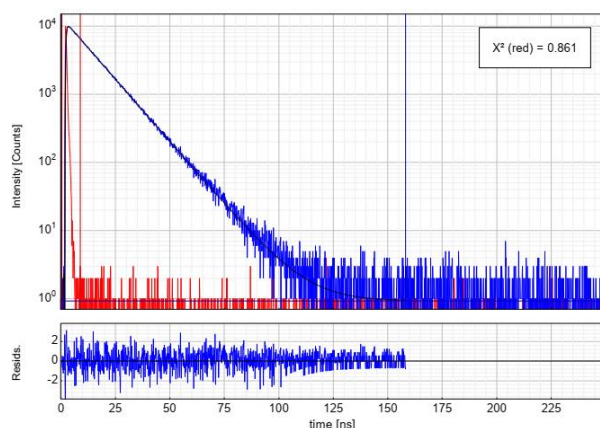

| Parameter                | Value    | Conf. Lower | Conf. Upper | Conf. Estimation |
|--------------------------|----------|-------------|-------------|------------------|
| A <sub>1</sub> [Cnts]    | 11433.4  | -56.6       | +56.6       | Fitting          |
| τ <sub>1</sub> [ns]      | 11.8373  | -0.0426     | +0.0426     | Fitting          |
| Bkgr. Dec [Cnts]         | 0.927    | -0.370      | +0.370      | Fitting          |
| Bkgr. IRF [Cnts]         | -0.88    | -2.32       | +2.32       | Fitting          |
| Shift IRF [ns]           | -0.09104 | -0.00972    | +0.00972    | Fitting          |
| A <sub>Scat</sub> [Cnts] | -12413   | -419        | +419        | Fitting          |

**Figure S49:** Left: Time-resolved photoluminescence decay of **Me** at 298 K (air-equilibrated) in a THF/water mixture (70/30), including the residuals ( $\lambda_{exc} = 325 \text{ nm}$ ,  $\lambda_{em} = 430 \text{ nm}$ ) and the instrument response function (red). Right: Fitting parameters including pre-exponential factors and confidence limits.

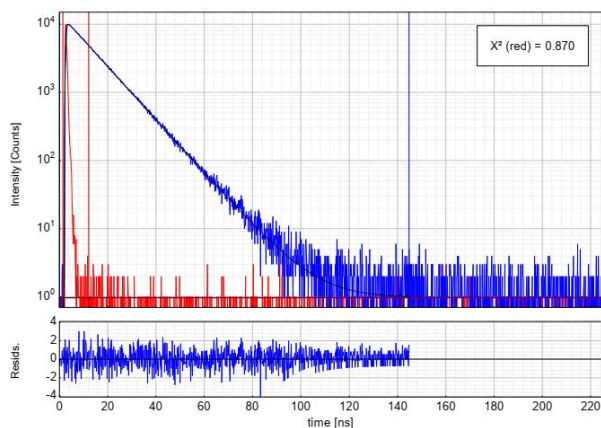

| Parameter          | Value   | Conf. Lower | Conf. Upper | Conf. Estimation |
|--------------------|---------|-------------|-------------|------------------|
| $A_1$ [Cnts]       | 11401.7 | -57.2       | +57.2       | Fitting          |
| $\tau_1$ [ns]      | 11.1308 | -0.0398     | +0.0398     | Fitting          |
| Bkgr. Dec [Cnts]   | 0.972   | -0.383      | +0.383      | Fitting          |
| Bkgr. IRF [Cnts]   | 0.97    | -2.13       | +2.13       | Fitting          |
| Shift IRF [ns]     | 0.08398 | -0.00785    | +0.00785    | Fitting          |
| $A_{Scale}$ [Cnts] | 3405    | -994        | +994        | Fitting          |

**Figure S50:** Left: Time-resolved photoluminescence decay of **Me** (blue) at 298 K (air-equilibrated) in a THF/water mixture (50/50), including the residuals ( $\lambda_{exc} = 325$  nm,  $\lambda_{em} = 430$  nm) and the instrument response function (red). Right: Fitting parameters including pre-exponential factors and confidence limits.

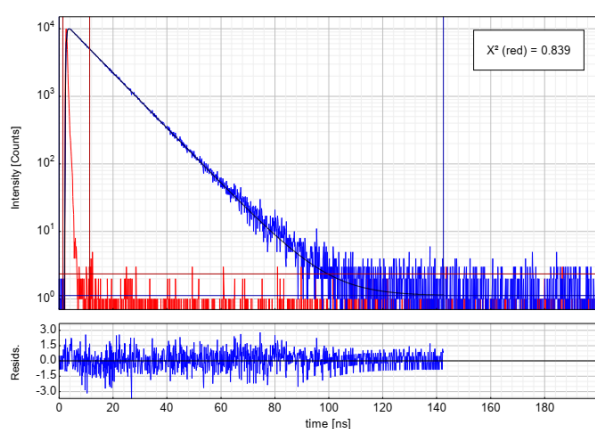

| Parameter          | Value   | Conf. Lower | Conf. Upper | Conf. Estimation |
|--------------------|---------|-------------|-------------|------------------|
| $A_1$ [Cnts]       | 11426.4 | -57.2       | +57.2       | Fitting          |
| $\tau_1$ [ns]      | 10.6199 | -0.0379     | +0.0379     | Fitting          |
| Bkgr. Dec [Cnts]   | 1.124   | -0.372      | +0.372      | Fitting          |
| Bkgr. IRF [Cnts]   | 2.36    | -2.46       | +2.46       | Fitting          |
| Shift IRF [ns]     | 0.73661 | -0.00700    | +0.00700    | Fitting          |
| $A_{Scale}$ [Cnts] | 3923    | -969        | +969        | Fitting          |

**Figure S51:** Left: Time-resolved photoluminescence decay of **Me** (blue) at 298 K (air-equilibrated) in a THF/water mixture (30/70), including the residuals ( $\lambda_{exc} = 325$  nm,  $\lambda_{em} = 430$  nm) and the instrument response function (red). Right: Fitting parameters including pre-exponential factors and confidence limits.

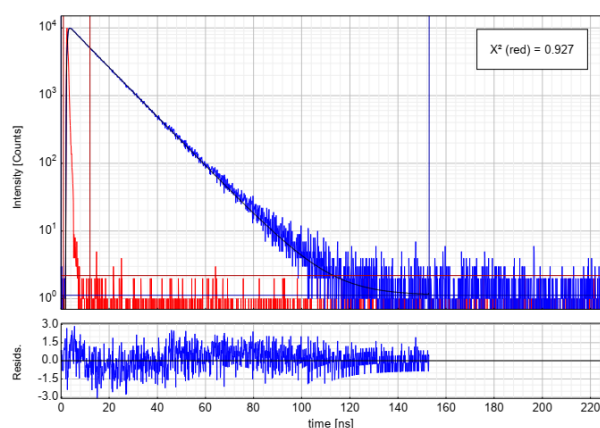

| Parameter          | Value   | Conf. Lower | Conf. Upper | Conf. Estimation |
|--------------------|---------|-------------|-------------|------------------|
| $A_1$ [Cnts]       | 11257.7 | -58.1       | +58.1       | Fitting          |
| $\tau_1$ [ns]      | 11.9624 | -0.0444     | +0.0444     | Fitting          |
| Bkgr. Dec [Cnts]   | 1.129   | -0.401      | +0.401      | Fitting          |
| Bkgr. IRF [Cnts]   | 2.19    | -2.28       | +2.28       | Fitting          |
| Shift IRF [ns]     | 0.98656 | -0.00827    | +0.00827    | Fitting          |
| $A_{Scale}$ [Cnts] | 268     | -978        | +978        | Fitting          |

**Figure S52:** Left: Time-resolved photoluminescence decay of **Me** (blue) at 298 K (air-equilibrated) in a THF/water mixture (20/80), including the residuals ( $\lambda_{exc} = 325$  nm,  $\lambda_{em} = 430$  nm) and the instrument response function (red). Right: Fitting parameters including pre-exponential factors and confidence limits.

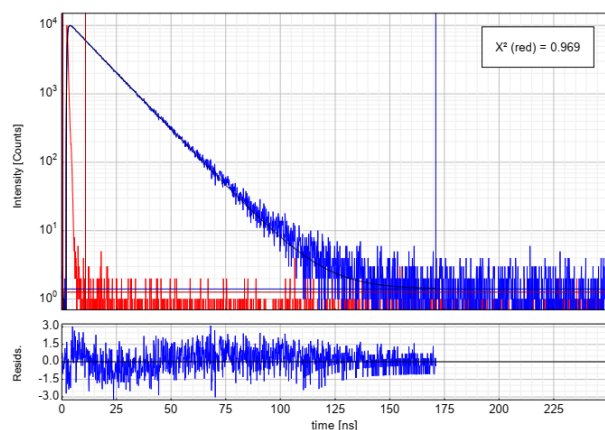

| Parameter                 | Value   | Conf. Lower | Conf. Upper | Conf. Estimation |
|---------------------------|---------|-------------|-------------|------------------|
| $A_1$ [Cnts]              | 11515.2 | -60.5       | +60.5       | Fitting          |
| $\tau_1$ [ns]             | 13.1154 | -0.0497     | +0.0497     | Fitting          |
| Bkgr. Dec [Cnts]          | 1.413   | -0.420      | +0.420      | Fitting          |
| Bkgr. IRF [Cnts]          | 1.27    | -1.93       | +1.93       | Fitting          |
| Shift IRF [ns]            | 0.0073  | -0.0121     | +0.0121     | Fitting          |
| $A_{\text{Scale}}$ [Cnts] | -7379   | -834        | +834        | Fitting          |

**Figure S53:** Left: Time-resolved photoluminescence decay of **Me** (blue) at 298 K (air-equilibrated) in a THF/water mixture (10/90), including the residuals ( $\lambda_{\text{exc}} = 325$  nm,  $\lambda_{\text{em}} = 430$  nm) and the instrument response function (red). Right: Fitting parameters including pre-exponential factors and confidence limits.

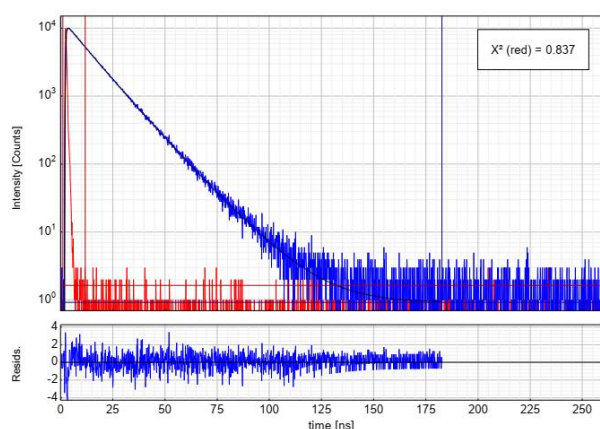

| Parameter                 | Value   | Conf. Lower | Conf. Upper | Conf. Estimation |
|---------------------------|---------|-------------|-------------|------------------|
| $A_1$ [Cnts]              | 1962.5  | -44.0       | +44.0       | Fitting          |
| $\tau_1$ [ns]             | 16.119  | -0.205      | +0.205      | Fitting          |
| $A_2$ [Cnts]              | 9639.8  | -64.8       | +64.8       | Fitting          |
| $\tau_2$ [ns]             | 11.3205 | -0.0586     | +0.0586     | Fitting          |
| Bkgr. Dec [Cnts]          | 0.925   | -0.355      | +0.355      | Fitting          |
| Bkgr. IRF [Cnts]          | 1.65    | -2.53       | +2.53       | Fitting          |
| Shift IRF [ns]            | 1.0812  | -0.0100     | +0.0100     | Fitting          |
| $A_{\text{Scale}}$ [Cnts] | -5202   | -899        | +899        | Fitting          |

Average Lifetime:  
 $\tau_{\text{Av},1} = 12.399$  ns (intensity weighted)  
 $\tau_{\text{Av},2} = 12.132$  ns (amplitude weighted)

**Figure S54:** Left: Time-resolved photoluminescence decay of **Me** (blue) at 298 K (air-equilibrated) in a THF/water mixture (5/95), including the residuals ( $\lambda_{\text{exc}} = 325$  nm,  $\lambda_{\text{em}} = 430$  nm) and the instrument response function (red). Right: Fitting parameters including pre-exponential factors and confidence limits.

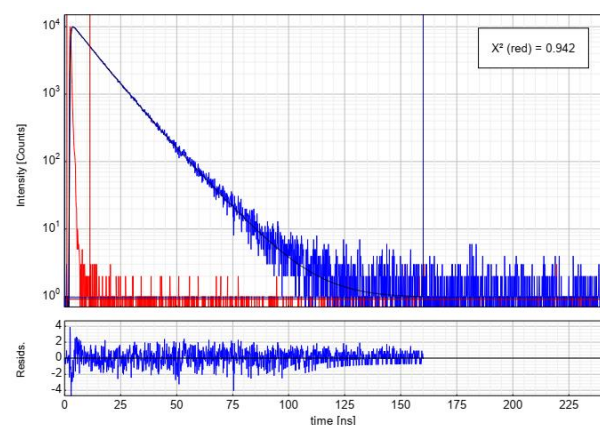

| Parameter                 | Value  | Conf. Lower | Conf. Upper | Conf. Estimation |
|---------------------------|--------|-------------|-------------|------------------|
| $A_1$ [Cnts]              | 4001.3 | -50.7       | +50.7       | Fitting          |
| $\tau_1$ [ns]             | 13.322 | -0.103      | +0.103      | Fitting          |
| $A_2$ [Cnts]              | 7694.9 | -72.7       | +72.7       | Fitting          |
| $\tau_2$ [ns]             | 9.3223 | -0.0720     | +0.0720     | Fitting          |
| Bkgr. Dec [Cnts]          | 0.962  | -0.383      | +0.383      | Fitting          |
| Bkgr. IRF [Cnts]          | 0.91   | -2.56       | +2.56       | Fitting          |
| Shift IRF [ns]            | 0.5413 | -0.0108     | +0.0108     | Fitting          |
| $A_{\text{Scale}}$ [Cnts] | -7616  | -794        | +794        | Fitting          |

Average Lifetime:  
 $\tau_{\text{Av},1} = 11.027$  ns (intensity weighted)  
 $\tau_{\text{Av},2} = 10.691$  ns (amplitude weighted)

**Figure S55:** Left: Time-resolved photoluminescence decay of **Me** (blue) at 298 K (air-equilibrated) in a THF/water mixture (1/99), including the residuals ( $\lambda_{\text{exc}} = 325$  nm,  $\lambda_{\text{em}} = 430$  nm) and the instrument response function (red). Right: Fitting parameters including pre-exponential factors and confidence limits.



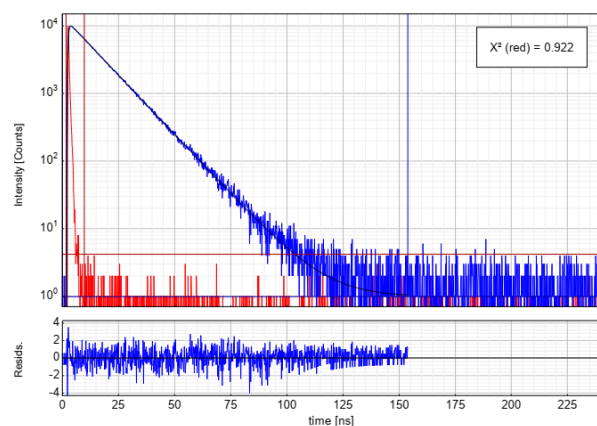

| Parameter                   | Value   | Conf. Lower | Conf. Upper | Conf. Estimation |
|-----------------------------|---------|-------------|-------------|------------------|
| A <sub>1</sub> [Cnts]       | 11549.6 | -57.2       | +57.2       | Fitting          |
| τ <sub>1</sub> [ns]         | 12.3499 | -0.0443     | +0.0443     | Fitting          |
| Bkgr. Dec [Cnts]            | 0.988   | -0.414      | +0.414      | Fitting          |
| Bkgr. <sub>IRF</sub> [Cnts] | 4.17    | -4.39       | +4.39       | Fitting          |
| Shift <sub>IRF</sub> [ns]   | 1.71938 | -0.00937    | +0.00937    | Fitting          |
| A <sub>Scat</sub> [Cnts]    | -12122  | -485        | +485        | Fitting          |

**Figure S56:** Left: Time-resolved photoluminescence decay of **t-Bu** (blue) at 298 K (air-equilibrated) in a THF solution, including the residuals ( $\lambda_{\text{exc}} = 325$  nm,  $\lambda_{\text{em}} = 430$  nm) and the instrument response function (red). Right: Fitting parameters including pre-exponential factors and confidence limits.

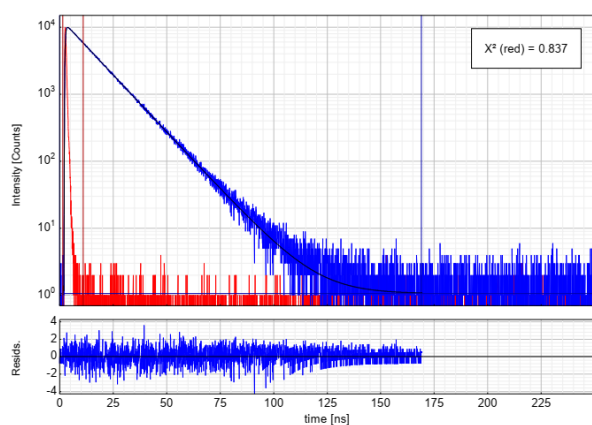

| Parameter                   | Value   | Conf. Lower | Conf. Upper | Conf. Estimation |
|-----------------------------|---------|-------------|-------------|------------------|
| A <sub>1</sub> [Cnts]       | 11178.0 | -56.1       | +56.1       | Fitting          |
| τ <sub>1</sub> [ns]         | 12.7456 | -0.0456     | +0.0456     | Fitting          |
| Bkgr. Dec [Cnts]            | 1.060   | -0.370      | +0.370      | Fitting          |
| Bkgr. <sub>IRF</sub> [Cnts] | 0.092   | -2.69       | +2.69       | Fitting          |
| Shift <sub>IRF</sub> [ns]   | 0.19404 | -0.00985    | +0.00985    | Fitting          |
| A <sub>Scat</sub> [Cnts]    | 12200   | -2060       | +2060       | Fitting          |

**Figure S57:** Left: Time-resolved photoluminescence decay of **t-Bu** (blue) at 298 K (air-equilibrated) in a THF/water mixture (70/30), including the residuals ( $\lambda_{\text{exc}} = 325$  nm,  $\lambda_{\text{em}} = 430$  nm) and the instrument response function (red). Right: Fitting parameters including pre-exponential factors and confidence limits.

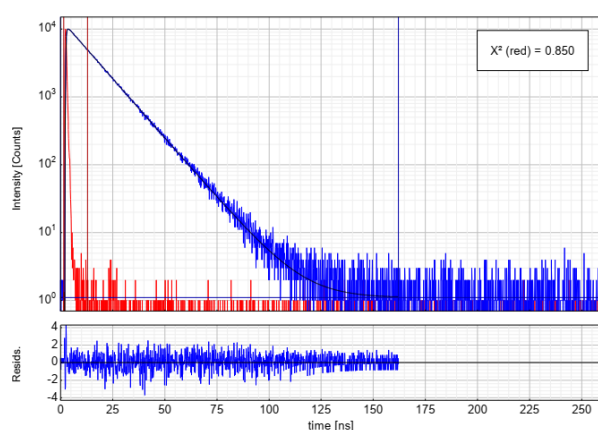

| Parameter                   | Value   | Conf. Lower | Conf. Upper | Conf. Estimation |
|-----------------------------|---------|-------------|-------------|------------------|
| A <sub>1</sub> [Cnts]       | 11472.0 | -55.8       | +55.8       | Fitting          |
| τ <sub>1</sub> [ns]         | 12.3871 | -0.0438     | +0.0438     | Fitting          |
| Bkgr. Dec [Cnts]            | 1.102   | -0.381      | +0.381      | Fitting          |
| Bkgr. <sub>IRF</sub> [Cnts] | -0.75   | -3.83       | +3.83       | Fitting          |
| Shift <sub>IRF</sub> [ns]   | 1.47423 | -0.00879    | +0.00879    | Fitting          |
| A <sub>Scat</sub> [Cnts]    | -12674  | -411        | +411        | Fitting          |

**Figure S58:** Left: Time-resolved photoluminescence decay of **t-Bu** (blue) at 298 K (air-equilibrated) in a THF/water mixture (50/50), including the residuals ( $\lambda_{\text{exc}} = 325$  nm,  $\lambda_{\text{em}} = 430$  nm) and the instrument response function (red). Right: Fitting parameters including pre-exponential factors and confidence limits.

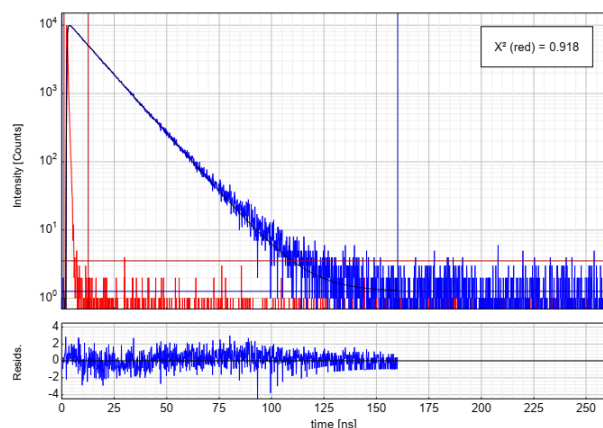

| Parameter                 | Value   | Conf. Lower | Conf. Upper | Conf. Estimation |
|---------------------------|---------|-------------|-------------|------------------|
| A <sub>1</sub> [Cnts]     | 11357.2 | -57.2       | +57.2       | Fitting          |
| τ <sub>1</sub> [ns]       | 12.6262 | -0.0461     | +0.0461     | Fitting          |
| Bkgr. Dec [Cnts]          | 1.267   | -0.412      | +0.412      | Fitting          |
| Bkgr. IRF [Cnts]          | 3.53    | -2.23       | +2.23       | Fitting          |
| Shift IRF [ns]            | 0.21559 | -0.00848    | +0.00848    | Fitting          |
| A <sub>Scale</sub> [Cnts] | -11509  | -537        | +537        | Fitting          |

**Figure S59:** Left: Time-resolved photoluminescence decay of **t-Bu** (blue) at 298 K (air-equilibrated) in a THF/water mixture (30/70), including the residuals ( $\lambda_{\text{exc}} = 325$  nm,  $\lambda_{\text{em}} = 430$  nm) and the instrument response function (red). Right: Fitting parameters including pre-exponential factors and confidence limits.

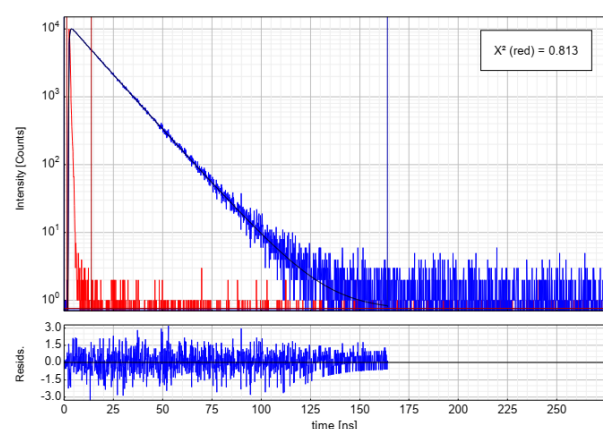

| Parameter                 | Value   | Conf. Lower | Conf. Upper | Conf. Estimation |
|---------------------------|---------|-------------|-------------|------------------|
| A <sub>1</sub> [Cnts]     | 10320.9 | -54.7       | +54.7       | Fitting          |
| τ <sub>1</sub> [ns]       | 13.0530 | -0.0505     | +0.0505     | Fitting          |
| A <sub>2</sub> [Cnts]     | 1018.3  | -41.4       | +41.4       | Fitting          |
| τ <sub>2</sub> [ns]       | 16.745  | -0.410      | +0.410      | Fitting          |
| Bkgr. Dec [Cnts]          | 0.725   | -0.390      | +0.390      | Fitting          |
| Bkgr. IRF [Cnts]          | 0.77    | -2.39       | +2.39       | Fitting          |
| Shift IRF [ns]            | 1.12133 | -0.00773    | +0.00773    | Fitting          |
| A <sub>Scale</sub> [Cnts] | 282     | -955        | +955        | Fitting          |

Average Lifetime:

$$\tau_{\text{Av},1} = 13.4677 \text{ ns (intensity weighted)}$$

$$\tau_{\text{Av},2} = 13.3845 \text{ ns (amplitude weighted)}$$

**Figure S60:** Left: Time-resolved photoluminescence decay of **t-Bu** (blue) at 298 K (air-equilibrated) in a THF/water mixture (20/80), including the residuals ( $\lambda_{\text{exc}} = 325$  nm,  $\lambda_{\text{em}} = 430$  nm) and the instrument response function (red). Right: Fitting parameters including pre-exponential factors and confidence limits.

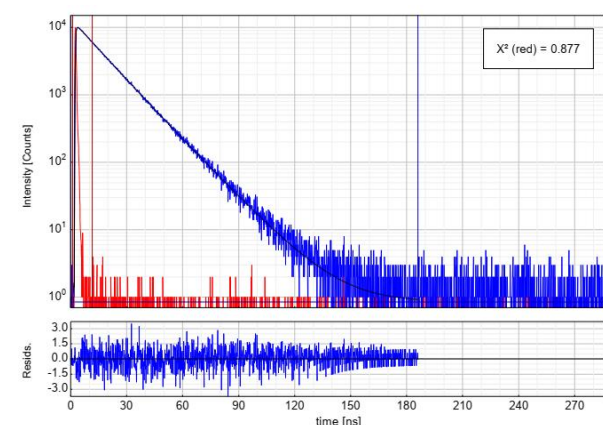

| Parameter                 | Value   | Conf. Lower | Conf. Upper | Conf. Estimation |
|---------------------------|---------|-------------|-------------|------------------|
| A <sub>1</sub> [Cnts]     | 4121.2  | -48.8       | +48.8       | Fitting          |
| τ <sub>1</sub> [ns]       | 16.618  | -0.126      | +0.126      | Fitting          |
| A <sub>2</sub> [Cnts]     | 7287.8  | -61.2       | +61.2       | Fitting          |
| τ <sub>2</sub> [ns]       | 13.2304 | -0.0872     | +0.0872     | Fitting          |
| Bkgr. Dec [Cnts]          | 0.854   | -0.396      | +0.396      | Fitting          |
| Bkgr. IRF [Cnts]          | -0.61   | -2.72       | +2.72       | Fitting          |
| Shift IRF [ns]            | 0.09467 | -0.00874    | +0.00874    | Fitting          |
| A <sub>Scale</sub> [Cnts] | -11840  | -554        | +554        | Fitting          |

Average Lifetime:

$$\tau_{\text{Av},1} = 14.637 \text{ ns (intensity weighted)}$$

$$\tau_{\text{Av},2} = 14.454 \text{ ns (amplitude weighted)}$$

**Figure S61:** Left: Time-resolved photoluminescence decay of **t-Bu** (blue) at 298 K (air-equilibrated) in a THF/water mixture (10/90), including the residuals ( $\lambda_{\text{exc}} = 325$  nm,  $\lambda_{\text{em}} = 430$  nm) and the instrument response function (red). Right: Fitting parameters including pre-exponential factors and confidence limits.

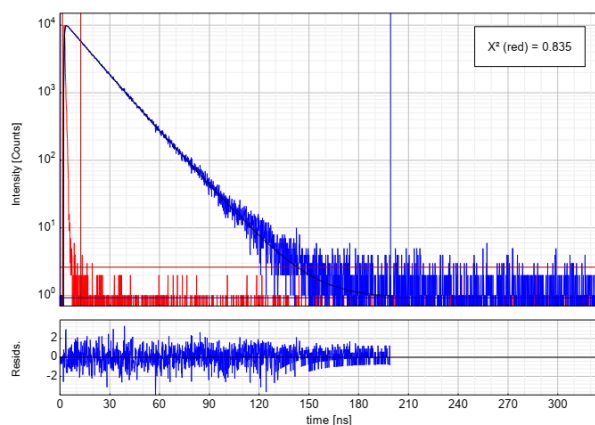

| Parameter                 | Value   | Conf. Lower | Conf. Upper | Conf. Estimation |
|---------------------------|---------|-------------|-------------|------------------|
| A <sub>1</sub> [Cnts]     | 7332.2  | -51.0       | +51.0       | Fitting          |
| τ <sub>1</sub> [ns]       | 16.7067 | -0.0727     | +0.0727     | Fitting          |
| A <sub>2</sub> [Cnts]     | 3799.8  | -67.2       | +67.2       | Fitting          |
| τ <sub>2</sub> [ns]       | 12.726  | -0.216      | +0.216      | Fitting          |
| Bkgr. Dec [Cnts]          | 0.931   | -0.386      | +0.386      | Fitting          |
| Bkgr. IRF [Cnts]          | 2.61    | -3.00       | +3.00       | Fitting          |
| Shift IRF [ns]            | 1.62137 | -0.00946    | +0.00946    | Fitting          |
| A <sub>Scale</sub> [Cnts] | 376     | -1070       | +1070       | Fitting          |

Average Lifetime:

$$\tau_{Av,1} = 15.5801 \text{ ns (intensity weighted)}$$

$$\tau_{Av,2} = 15.3480 \text{ ns (amplitude weighted)}$$

**Figure S62:** Left: Time-resolved photoluminescence decay of **t-Bu** (blue) at 298 K (air-equilibrated) in a THF/water mixture (5/95), including the residuals ( $\lambda_{exc} = 325 \text{ nm}$ ,  $\lambda_{em} = 430 \text{ nm}$ ) and the instrument response function (red). Right: Fitting parameters including pre-exponential factors and confidence limits.

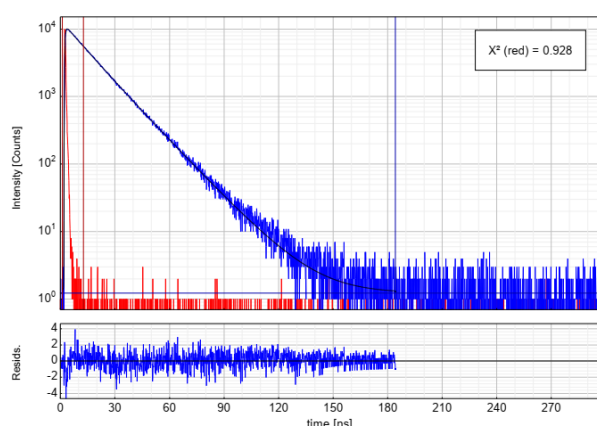

| Parameter                 | Value    | Conf. Lower | Conf. Upper | Conf. Estimation |
|---------------------------|----------|-------------|-------------|------------------|
| A <sub>1</sub> [Cnts]     | 6524.5   | -51.5       | +51.5       | Fitting          |
| τ <sub>1</sub> [ns]       | 16.2286  | -0.0849     | +0.0849     | Fitting          |
| A <sub>2</sub> [Cnts]     | 4827.0   | -68.5       | +68.5       | Fitting          |
| τ <sub>2</sub> [ns]       | 12.033   | -0.142      | +0.142      | Fitting          |
| Bkgr. Dec [Cnts]          | 1.232    | -0.438      | +0.438      | Fitting          |
| Bkgr. IRF [Cnts]          | -0.272   | -3.02       | +3.02       | Fitting          |
| Shift IRF [ns]            | -0.04721 | -0.00982    | +0.00982    | Fitting          |
| A <sub>Scale</sub> [Cnts] | -3513    | -986        | +986        | Fitting          |

Average Lifetime:

$$\tau_{Av,1} = 14.7424 \text{ ns (intensity weighted)}$$

$$\tau_{Av,2} = 14.4446 \text{ ns (amplitude weighted)}$$

**Figure S63:** Left: Time-resolved photoluminescence decay of **t-Bu** (blue) at 298 K (air-equilibrated) in a THF/water mixture (1/99), including the residuals ( $\lambda_{exc} = 325 \text{ nm}$ ,  $\lambda_{em} = 430 \text{ nm}$ ) and the instrument response function (red). Right: Fitting parameters including pre-exponential factors and confidence limits.

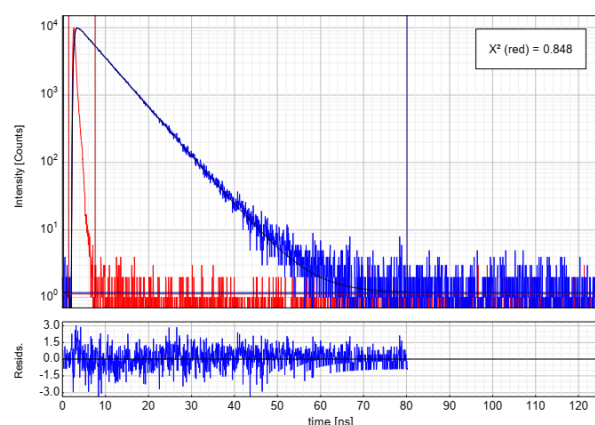

| Parameter                 | Value   | Conf. Lower | Conf. Upper | Conf. Estimation |
|---------------------------|---------|-------------|-------------|------------------|
| A <sub>1</sub> [Cnts]     | 12022.6 | -59.0       | +59.0       | Fitting          |
| τ <sub>1</sub> [ns]       | 5.9599  | -0.0209     | +0.0209     | Fitting          |
| Bkgr. Dec [Cnts]          | 1.183   | -0.381      | +0.381      | Fitting          |
| Bkgr. IRF [Cnts]          | 1.12    | -3.02       | +3.02       | Fitting          |
| Shift IRF [ns]            | 0.95002 | -0.00536    | +0.00536    | Fitting          |
| A <sub>Scale</sub> [Cnts] | 8350    | -1390       | +1390       | Fitting          |

**Figure S64:** Left: Time-resolved photoluminescence decay of **OMe** (blue) at 298 K (air-equilibrated) in a THF solution, including the residuals ( $\lambda_{exc} = 325 \text{ nm}$ ,  $\lambda_{em} = 450 \text{ nm}$ ) and the instrument response function (red). Right: Fitting parameters including pre-exponential factors and confidence limits.

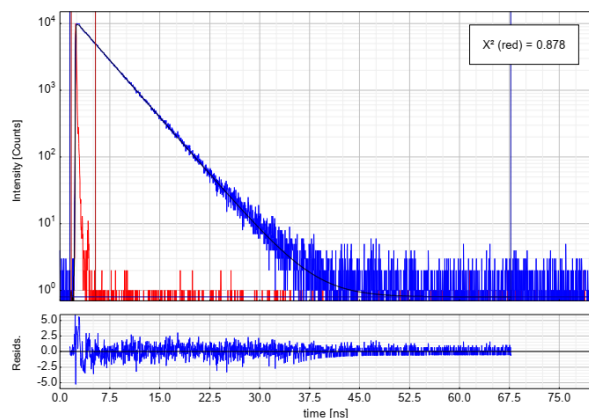

| Parameter             | Value  | Conf. Lower | Conf. Upper | Conf. Estimation |
|-----------------------|--------|-------------|-------------|------------------|
| A <sub>1</sub> [Cnts] | 6478.4 | -42.9       | +42.9       | Fitting          |
| τ <sub>1</sub> [ns]   | 6.5363 | -0.0319     | +0.0319     | Fitting          |
| Bkgr. dec [Cnts]      | 1.402  | -0.357      | +0.357      | Fitting          |

**Figure S65:** Left: Time-resolved photoluminescence decay of **OMe** (blue) at 298 K (air-equilibrated) in a THF/water mixture (70/30), including the residuals ( $\lambda_{\text{exc}} = 325$  nm,  $\lambda_{\text{em}} = 450$  nm) and the instrument response function (red). Right: Fitting parameters including pre-exponential factors and confidence limits.

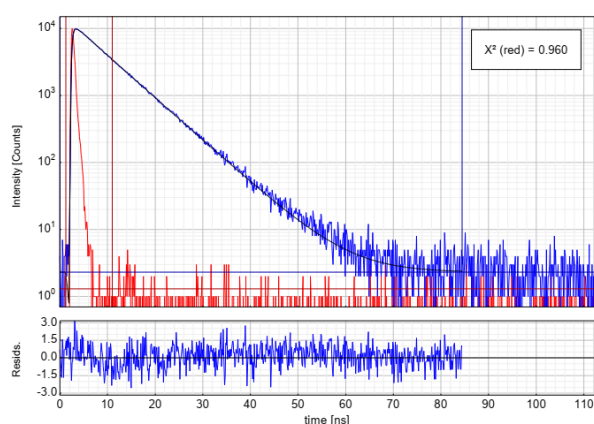

| Parameter                 | Value   | Conf. Lower | Conf. Upper | Conf. Estimation |
|---------------------------|---------|-------------|-------------|------------------|
| A <sub>1</sub> [Cnts]     | 11651.8 | -59.3       | +59.3       | Fitting          |
| τ <sub>1</sub> [ns]       | 6.8569  | -0.0250     | +0.0250     | Fitting          |
| Bkgr. dec [Cnts]          | 2.308   | -0.500      | +0.500      | Fitting          |
| Bkgr. spf [Cnts]          | 1.30    | -2.41       | +2.41       | Fitting          |
| Shift spf [ns]            | 1.01164 | -0.00487    | +0.00487    | Fitting          |
| A <sub>scale</sub> [Cnts] | 6430    | -828        | +828        | Fitting          |

**Figure S66:** Left: Time-resolved photoluminescence decay of **OMe** (blue) at 298 K (air-equilibrated) in a THF/water mixture (50/50), including the residuals ( $\lambda_{\text{exc}} = 325$  nm,  $\lambda_{\text{em}} = 450$  nm) and the instrument response function (red). Right: Fitting parameters including pre-exponential factors and confidence limits.

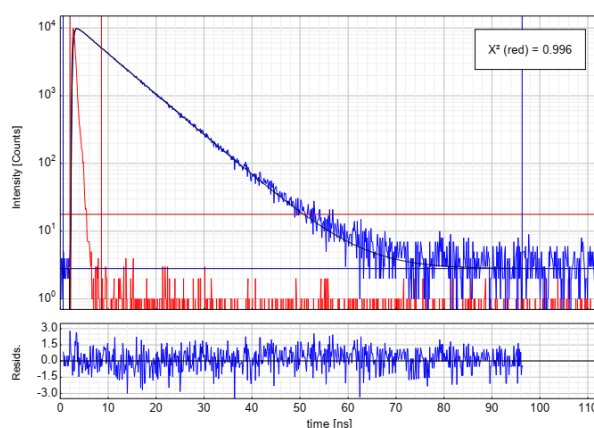

| Parameter                 | Value   | Conf. Lower | Conf. Upper | Conf. Estimation |
|---------------------------|---------|-------------|-------------|------------------|
| A <sub>1</sub> [Cnts]     | 11560.4 | -62.7       | +62.7       | Fitting          |
| τ <sub>1</sub> [ns]       | 7.2467  | -0.0281     | +0.0281     | Fitting          |
| Bkgr. dec [Cnts]          | 2.797   | -0.508      | +0.508      | Fitting          |
| Bkgr. spf [Cnts]          | 17.84   | -5.08       | +5.08       | Fitting          |
| Shift spf [ns]            | 2.02270 | -0.00579    | +0.00579    | Fitting          |
| A <sub>scale</sub> [Cnts] | 6577    | -901        | +901        | Fitting          |

**Figure S67:** Left: Time-resolved photoluminescence decay of **OMe** (blue) at 298 K (air-equilibrated) in a THF/water mixture (30/70), including the residuals ( $\lambda_{\text{exc}} = 325$  nm,  $\lambda_{\text{em}} = 450$  nm) and the instrument response function (red). Right: Fitting parameters including pre-exponential factors and confidence limits.



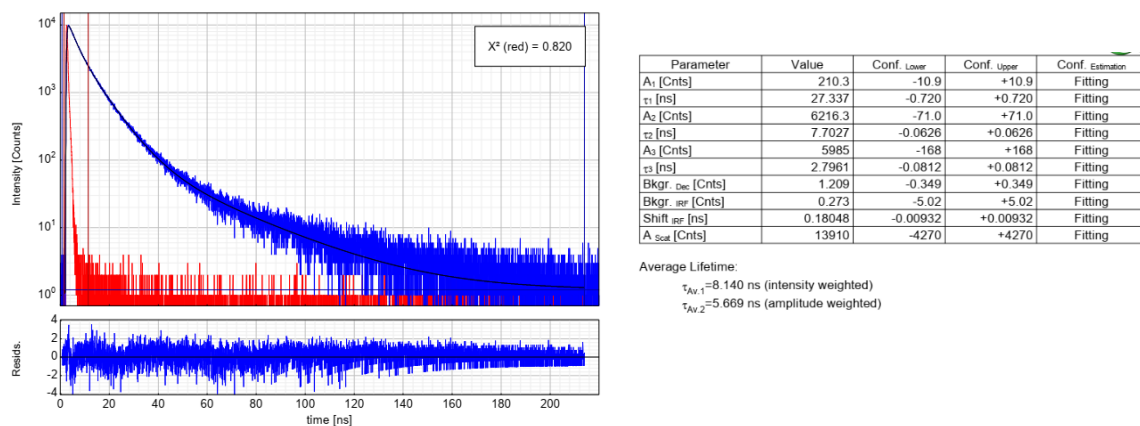

**Figure S68:** Left: Time-resolved photoluminescence decay of **OMe** (blue) at 298 K (air-equilibrated) in a THF/water mixture (20/80), including the residuals ( $\lambda_{\text{exc}} = 325$  nm,  $\lambda_{\text{em}} = 450$  nm) and the instrument response function (red). Right: Fitting parameters including pre-exponential factors and confidence limits.

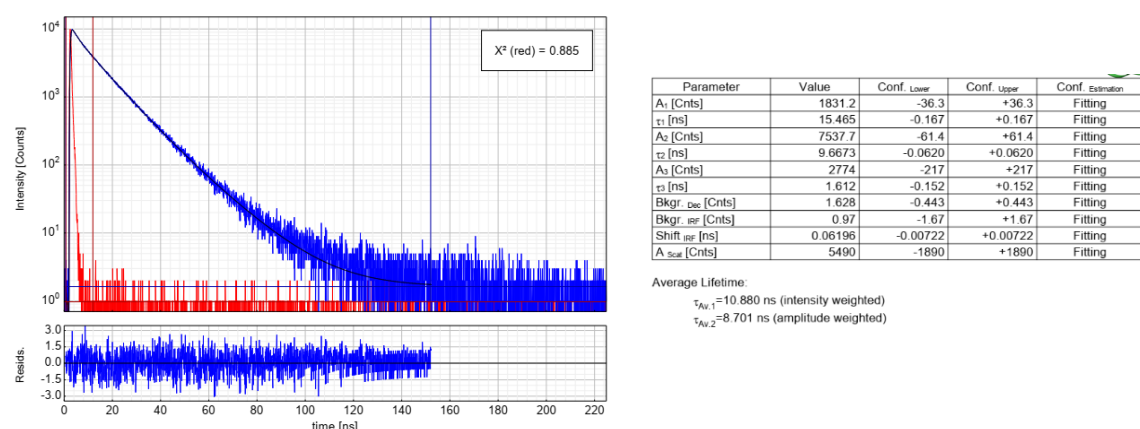

**Figure S69:** Left: Time-resolved photoluminescence decay of **OMe** (blue) at 298 K (air-equilibrated) in a THF/water mixture (10/90), including the residuals ( $\lambda_{\text{exc}} = 325$  nm,  $\lambda_{\text{em}} = 450$  nm) and the instrument response function (red). Right: Fitting parameters including pre-exponential factors and confidence limits.

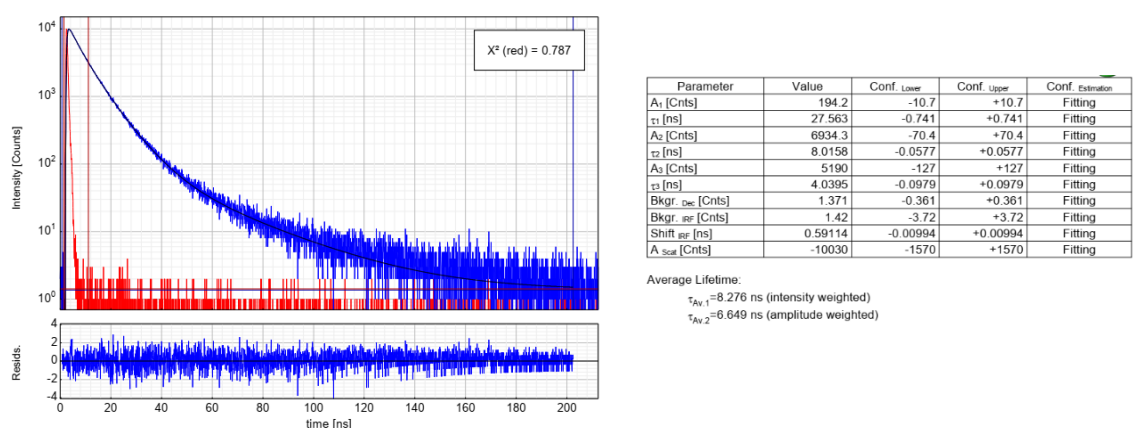

**Figure S70:** Left: Time-resolved photoluminescence decay of **OMe** (blue) at 298 K (air-equilibrated) in a THF/water mixture (5/95), including the residuals ( $\lambda_{\text{exc}} = 325$  nm,  $\lambda_{\text{em}} = 450$  nm) and the instrument response function (red). Right: Fitting parameters including pre-exponential factors and confidence limits.

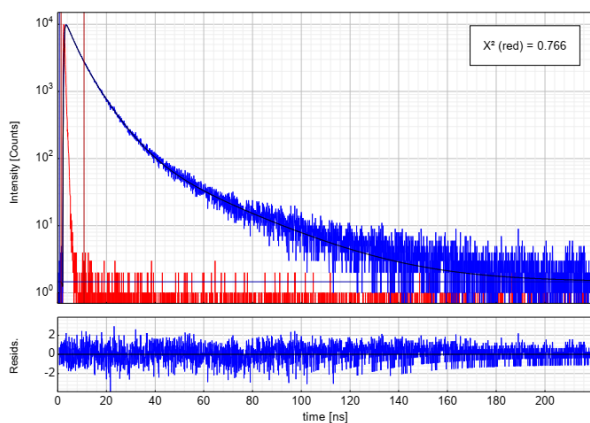

| Parameter          | Value    | Conf. Lower | Conf. Upper | Conf. Estimation |
|--------------------|----------|-------------|-------------|------------------|
| $A_1$ [Cnts]       | 249.7    | -11.5       | +11.5       | Fitting          |
| $\tau_1$ [ns]      | 26.621   | -0.625      | +0.625      | Fitting          |
| $A_2$ [Cnts]       | 6041.0   | -72.5       | +72.5       | Fitting          |
| $\tau_2$ [ns]      | 7.4839   | -0.0638     | +0.0638     | Fitting          |
| $A_3$ [Cnts]       | 6271     | -145        | +145        | Fitting          |
| $\tau_3$ [ns]      | 3.3172   | -0.0782     | +0.0782     | Fitting          |
| Bkgr. dec [Cnts]   | 1.463    | -0.345      | +0.345      | Fitting          |
| Bkgr. rrf [Cnts]   | 0.53     | -3.59       | +3.59       | Fitting          |
| Shift rrf [ns]     | -0.01686 | -0.00903    | +0.00903    | Fitting          |
| $A_{Scale}$ [Cnts] | -13100   | -1490       | +1490       | Fitting          |

Average Lifetime:

$$\tau_{Av,1} = 8.042 \text{ ns (intensity weighted)}$$

$$\tau_{Av,2} = 5.784 \text{ ns (amplitude weighted)}$$

**Figure S71:** Left: Time-resolved photoluminescence decay of **OMe** (blue) at 298 K (air-equilibrated) in a THF/water mixture (1/99), including the residuals ( $\lambda_{exc} = 325 \text{ nm}$ ,  $\lambda_{em} = 450 \text{ nm}$ ) and the instrument response function (red). Right: Fitting parameters including pre-exponential factors and confidence limits.

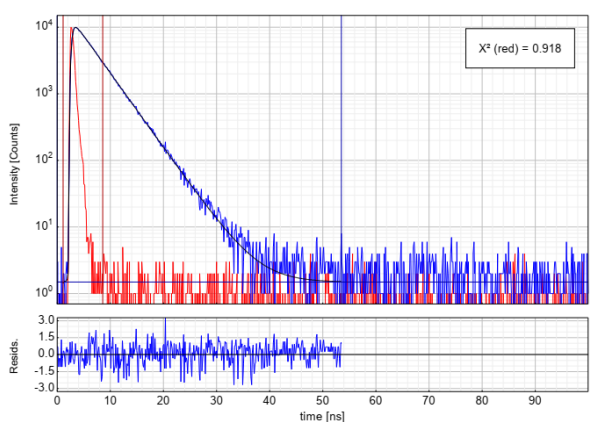

| Parameter          | Value   | Conf. Lower | Conf. Upper | Conf. Estimation |
|--------------------|---------|-------------|-------------|------------------|
| $A_1$ [Cnts]       | 13141.5 | -64.9       | +64.9       | Fitting          |
| $\tau_1$ [ns]      | 3.8873  | -0.0137     | +0.0137     | Fitting          |
| Bkgr. dec [Cnts]   | 1.488   | -0.416      | +0.416      | Fitting          |
| Bkgr. rrf [Cnts]   | 0.257   | -1.79       | +1.79       | Fitting          |
| Shift rrf [ns]     | 0.05507 | -0.00536    | +0.00536    | Fitting          |
| $A_{Scale}$ [Cnts] | 676     | -618        | +618        | Fitting          |

**Figure S72:** Left: Time-resolved photoluminescence decay of **SMe** (blue) at 298 K (air-equilibrated) in a THF solution, including the residuals ( $\lambda_{exc} = 325 \text{ nm}$ ,  $\lambda_{em} = 485 \text{ nm}$ ) and the instrument response function (red). Right: Fitting parameters including pre-exponential factors and confidence limits.

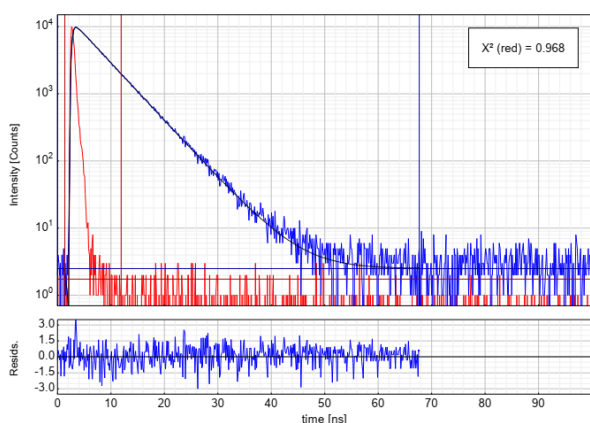

| Parameter          | Value   | Conf. Lower | Conf. Upper | Conf. Estimation |
|--------------------|---------|-------------|-------------|------------------|
| $A_1$ [Cnts]       | 12010.8 | -63.0       | +63.0       | Fitting          |
| $\tau_1$ [ns]      | 5.0691  | -0.0190     | +0.0190     | Fitting          |
| Bkgr. dec [Cnts]   | 2.499   | -0.487      | +0.487      | Fitting          |
| Bkgr. rrf [Cnts]   | 1.74    | -2.21       | +2.21       | Fitting          |
| Shift rrf [ns]     | 0.33362 | -0.00565    | +0.00565    | Fitting          |
| $A_{Scale}$ [Cnts] | 4839    | -737        | +737        | Fitting          |

**Figure S73:** Left: Time-resolved photoluminescence decay of **SMe** (blue) at 298 K (air-equilibrated) in a THF/water mixture (70/30), including the residuals ( $\lambda_{exc} = 325 \text{ nm}$ ,  $\lambda_{em} = 485 \text{ nm}$ ) and the instrument response function (red). Right: Fitting parameters including pre-exponential factors and confidence limits.

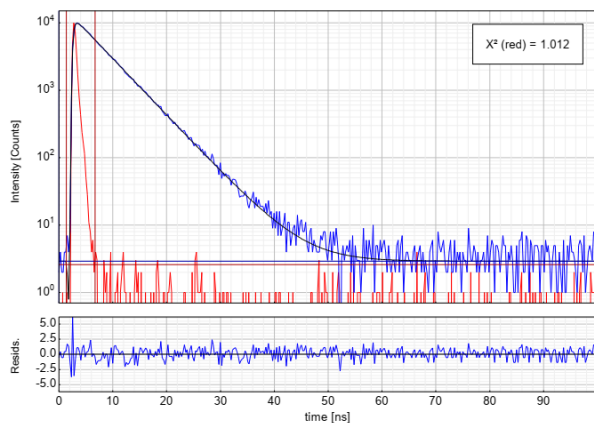

| Parameter                | Value   | Conf. Lower | Conf. Upper | Conf. Estimation |
|--------------------------|---------|-------------|-------------|------------------|
| $A_1$ [Cnts]             | 12134.5 | -78.3       | +78.3       | Fitting          |
| $\tau_1$ [ns]            | 5.1773  | -0.0236     | +0.0236     | Fitting          |
| Bkgr. dec [Cnts]         | 2.915   | -0.430      | +0.430      | Fitting          |
| Bkgr. irf [Cnts]         | 2.60    | -4.51       | +4.51       | Fitting          |
| Shift irf [ns]           | 0.68325 | -0.00673    | +0.00673    | Fitting          |
| $A_{\text{Scat}}$ [Cnts] | 4431    | -544        | +544        | Fitting          |

**Figure S74:** Left: Time-resolved photoluminescence decay of **SMe** (blue) at 298 K (air-equilibrated) in a THF/water mixture (50/50), including the residuals ( $\lambda_{\text{exc}} = 325$  nm,  $\lambda_{\text{em}} = 485$  nm) and the instrument response function (red). Right: Fitting parameters including pre-exponential factors and confidence limits.

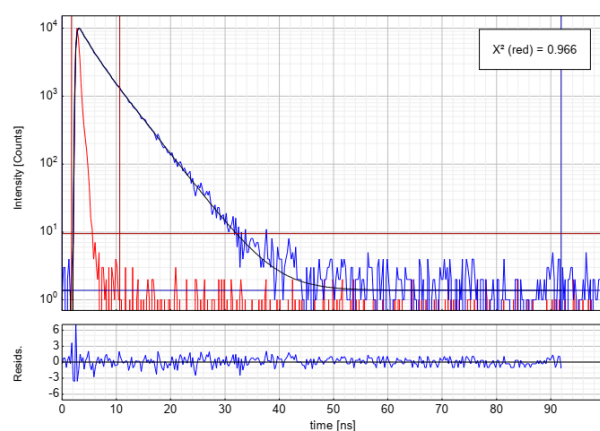

| Parameter                | Value   | Conf. Lower | Conf. Upper | Conf. Estimation |
|--------------------------|---------|-------------|-------------|------------------|
| $A_1$ [Cnts]             | 8467.4  | -73.8       | +73.8       | Fitting          |
| $\tau_1$ [ns]            | 4.2465  | -0.0243     | +0.0243     | Fitting          |
| $A_2$ [Cnts]             | 4191    | -184        | +184        | Fitting          |
| $\tau_2$ [ns]            | 1.5654  | -0.0664     | +0.0664     | Fitting          |
| Bkgr. dec [Cnts]         | 1.389   | -0.319      | +0.319      | Fitting          |
| Bkgr. irf [Cnts]         | 9.50    | -3.46       | +3.46       | Fitting          |
| Shift irf [ns]           | 1.71487 | -0.00550    | +0.00550    | Fitting          |
| $A_{\text{Scat}}$ [Cnts] | 9014    | -548        | +548        | Fitting          |

Average Lifetime:  
 $\tau_{\text{Av},1} = 3.8328$  ns (intensity weighted)  
 $\tau_{\text{Av},2} = 3.3588$  ns (amplitude weighted)

**Figure S75:** Left: Time-resolved photoluminescence decay of **SMe** (blue) at 298 K (air-equilibrated) in a THF/water mixture (30/70), including the residuals ( $\lambda_{\text{exc}} = 325$  nm,  $\lambda_{\text{em}} = 485$  nm) and the instrument response function (red). Right: Fitting parameters including pre-exponential factors and confidence limits.

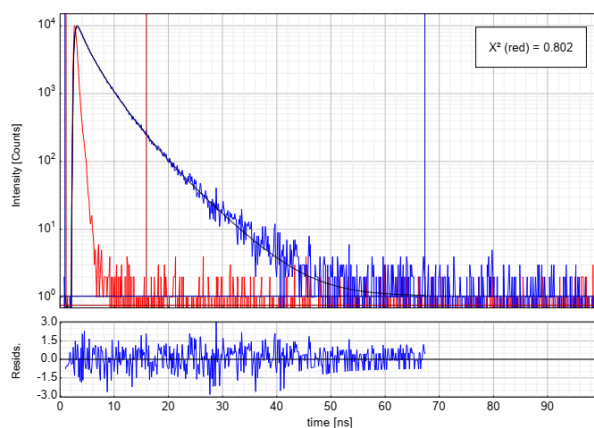

| Parameter                | Value   | Conf. Lower | Conf. Upper | Conf. Estimation |
|--------------------------|---------|-------------|-------------|------------------|
| $A_1$ [Cnts]             | 7270.1  | -76.8       | +76.8       | Fitting          |
| $\tau_1$ [ns]            | 2.8373  | -0.0233     | +0.0233     | Fitting          |
| $A_2$ [Cnts]             | 6522    | -214        | +214        | Fitting          |
| $\tau_2$ [ns]            | 0.8458  | -0.0284     | +0.0284     | Fitting          |
| $A_3$ [Cnts]             | 1677.3  | -32.3       | +32.3       | Fitting          |
| $\tau_3$ [ns]            | 5.8104  | -0.0590     | +0.0590     | Fitting          |
| Bkgr. dec [Cnts]         | 1.042   | -0.336      | +0.336      | Fitting          |
| Bkgr. irf [Cnts]         | 0.77    | -1.03       | +1.03       | Fitting          |
| Shift irf [ns]           | 0.85480 | -0.00444    | +0.00444    | Fitting          |
| $A_{\text{Scat}}$ [Cnts] | 8091    | -736        | +736        | Fitting          |

Average Lifetime:  
 $\tau_{\text{Av},1} = 3.3386$  ns (intensity weighted)  
 $\tau_{\text{Av},2} = 2.3201$  ns (amplitude weighted)

**Figure S76:** Left: Time-resolved photoluminescence decay of **SMe** (blue) at 298 K (air-equilibrated) in a THF/water mixture (20/80), including the residuals ( $\lambda_{\text{exc}} = 325$  nm,  $\lambda_{\text{em}} = 485$  nm) and the instrument response function (red). Right: Fitting parameters including pre-exponential factors and confidence limits.

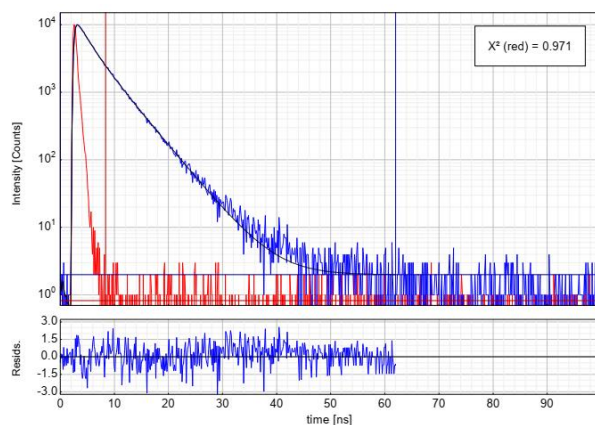

| Parameter                | Value   | Conf. Lower | Conf. Upper | Conf. Estimation |
|--------------------------|---------|-------------|-------------|------------------|
| A <sub>1</sub> [Cnts]    | 7663.9  | -57.7       | +57.7       | Fitting          |
| τ <sub>1</sub> [ns]      | 4.5051  | -0.0220     | +0.0220     | Fitting          |
| A <sub>2</sub> [Cnts]    | 5904    | -129        | +129        | Fitting          |
| τ <sub>2</sub> [ns]      | 1.8536  | -0.0400     | +0.0400     | Fitting          |
| Bkgr. Dec [Cnts]         | 1.990   | -0.422      | +0.422      | Fitting          |
| Bkgr. IRR [Cnts]         | 0.828   | -0.678      | +0.678      | Fitting          |
| Shift IRR [ns]           | 0.46862 | -0.00427    | +0.00427    | Fitting          |
| A <sub>Scat</sub> [Cnts] | 7317    | -762        | +762        | Fitting          |

Average Lifetime:

$$\tau_{Av,1} = 3.8669 \text{ ns (intensity weighted)}$$

$$\tau_{Av,2} = 3.3512 \text{ ns (amplitude weighted)}$$

**Figure S77:** Left: Time-resolved photoluminescence decay of **SMe** (blue) at 298 K (air-equilibrated) in a THF/water mixture (10/90), including the residuals ( $\lambda_{exc} = 325 \text{ nm}$ ,  $\lambda_{em} = 485 \text{ nm}$ ) and the instrument response function (red). Right: Fitting parameters including pre-exponential factors and confidence limits.

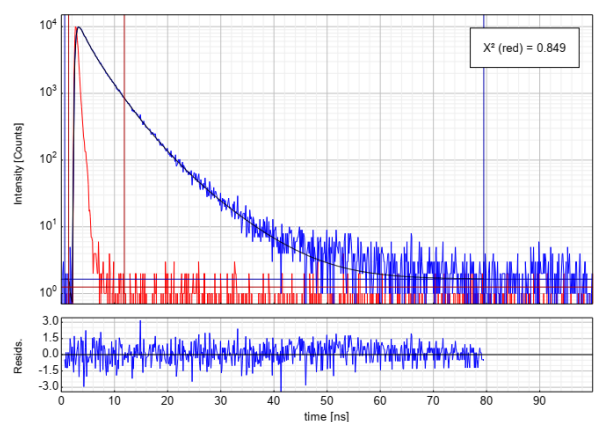

| Parameter                | Value   | Conf. Lower | Conf. Upper | Conf. Estimation |
|--------------------------|---------|-------------|-------------|------------------|
| A <sub>1</sub> [Cnts]    | 8498.6  | -76.7       | +76.7       | Fitting          |
| τ <sub>1</sub> [ns]      | 3.4012  | -0.0230     | +0.0230     | Fitting          |
| A <sub>2</sub> [Cnts]    | 5167    | -196        | +196        | Fitting          |
| τ <sub>2</sub> [ns]      | 1.0950  | -0.0437     | +0.0437     | Fitting          |
| A <sub>3</sub> [Cnts]    | 884.3   | -28.7       | +28.7       | Fitting          |
| τ <sub>3</sub> [ns]      | 7.193   | -0.116      | +0.116      | Fitting          |
| Bkgr. Dec [Cnts]         | 1.641   | -0.365      | +0.365      | Fitting          |
| Bkgr. IRR [Cnts]         | 1.26    | -1.88       | +1.88       | Fitting          |
| Shift IRR [ns]           | 0.99309 | -0.00488    | +0.00488    | Fitting          |
| A <sub>Scat</sub> [Cnts] | 4024    | -767        | +767        | Fitting          |

Average Lifetime:

$$\tau_{Av,1} = 3.6718 \text{ ns (intensity weighted)}$$

$$\tau_{Av,2} = 2.8127 \text{ ns (amplitude weighted)}$$

**Figure S78:** Left: Time-resolved photoluminescence decay of **SMe** (blue) at 298 K (air-equilibrated) in a THF/water mixture (5/95), including the residuals ( $\lambda_{exc} = 325 \text{ nm}$ ,  $\lambda_{em} = 485 \text{ nm}$ ) and the instrument response function (red). Right: Fitting parameters including pre-exponential factors and confidence limits.

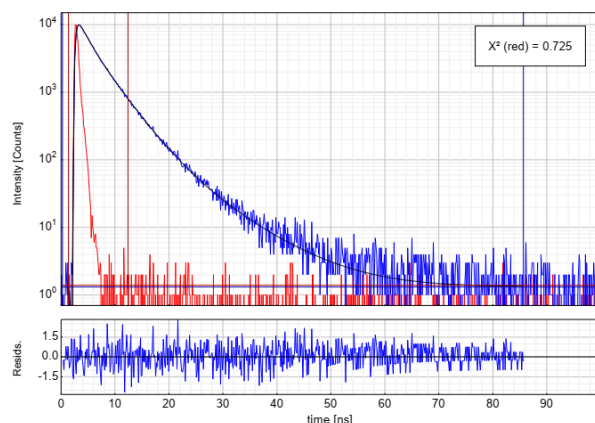

| Parameter                | Value   | Conf. Lower | Conf. Upper | Conf. Estimation |
|--------------------------|---------|-------------|-------------|------------------|
| A <sub>1</sub> [Cnts]    | 8585.7  | -69.7       | +69.7       | Fitting          |
| τ <sub>1</sub> [ns]      | 3.6937  | -0.0216     | +0.0216     | Fitting          |
| A <sub>2</sub> [Cnts]    | 5235    | -164        | +164        | Fitting          |
| τ <sub>2</sub> [ns]      | 1.3558  | -0.0437     | +0.0437     | Fitting          |
| A <sub>3</sub> [Cnts]    | 465.9   | -21.4       | +21.4       | Fitting          |
| τ <sub>3</sub> [ns]      | 8.474   | -0.177      | +0.177      | Fitting          |
| Bkgr. Dec [Cnts]         | 1.317   | -0.315      | +0.315      | Fitting          |
| Bkgr. IRR [Cnts]         | 1.40    | -1.76       | +1.76       | Fitting          |
| Shift IRR [ns]           | 0.22652 | -0.00459    | +0.00459    | Fitting          |
| A <sub>Scat</sub> [Cnts] | 5600    | -761        | +761        | Fitting          |

Average Lifetime:

$$\tau_{Av,1} = 3.7470 \text{ ns (intensity weighted)}$$

$$\tau_{Av,2} = 2.9929 \text{ ns (amplitude weighted)}$$

**Figure S79:** Left: Time-resolved photoluminescence decay of **SMe** (blue) at 298 K (air-equilibrated) in a THF/water mixture (1/99), including the residuals ( $\lambda_{exc} = 325 \text{ nm}$ ,  $\lambda_{em} = 485 \text{ nm}$ ) and the instrument response function (red). Right: Fitting parameters including pre-exponential factors and confidence limits.



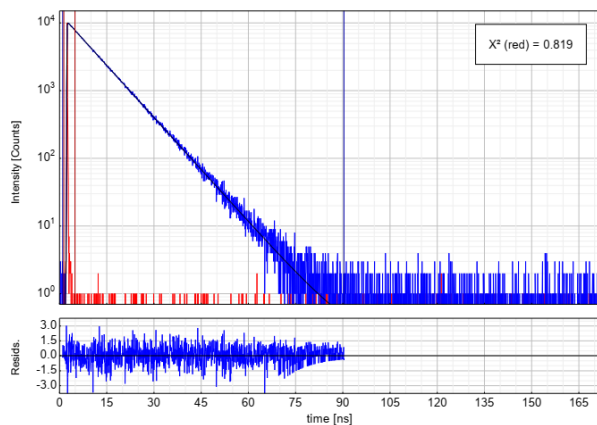

| Parameter                | Value   | Conf. Lower | Conf. Upper | Conf. Estimation |
|--------------------------|---------|-------------|-------------|------------------|
| A <sub>1</sub> [Cnts]    | 10579.3 | -47.9       | +47.9       | Fitting          |
| τ <sub>1</sub> [ns]      | 8.4617  | -0.0274     | +0.0274     | Fitting          |
| Bkgr. Dec [Cnts]         | 0.160   | -0.428      | +0.428      | Fitting          |
| Bkgr. IRR [Cnts]         | -0.158  | -0.597      | +0.597      | Fitting          |
| Shift IRR [ns]           | 1.23908 | -0.00407    | +0.00407    | Fitting          |
| A <sub>Scat</sub> [Cnts] | -2335   | -716        | +716        | Fitting          |

**Figure S80:** Left: Time-resolved photoluminescence decay of **NMe<sub>2</sub>** (blue) at 298 K (air-equilibrated) in a THF solution, including the residuals ( $\lambda_{\text{exc}} = 376$  nm,  $\lambda_{\text{em}} = 565$  nm) and the instrument response function (red). Right: Fitting parameters including pre-exponential factors and confidence limits.

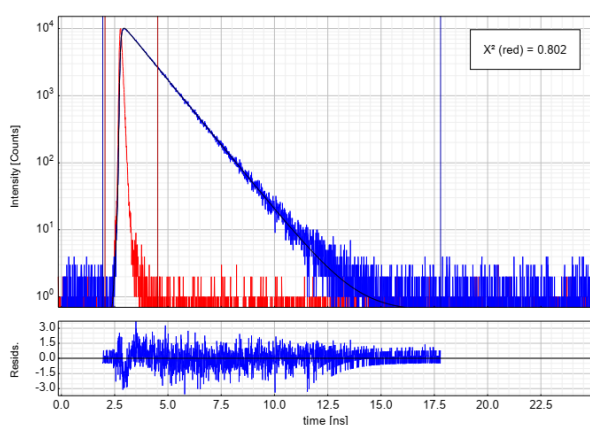

| Parameter                | Value    | Conf. Lower | Conf. Upper | Conf. Estimation |
|--------------------------|----------|-------------|-------------|------------------|
| A <sub>1</sub> [Cnts]    | 12234.0  | -58.9       | +58.9       | Fitting          |
| τ <sub>1</sub> [ns]      | 1.12371  | -0.00387    | +0.00387    | Fitting          |
| Bkgr. Dec [Cnts]         | 0.611    | -0.334      | +0.334      | Fitting          |
| Bkgr. IRR [Cnts]         | 0.140    | -0.560      | +0.560      | Fitting          |
| Shift IRR [ns]           | -0.14965 | -0.00130    | +0.00130    | Fitting          |
| A <sub>Scat</sub> [Cnts] | -3710    | -1920       | +1920       | Fitting          |

**Figure S81:** Left: Time-resolved photoluminescence decay of **NMe<sub>2</sub>** (blue) at 298 K (air-equilibrated) in a THF/water mixture (70/30), including the residuals ( $\lambda_{\text{exc}} = 376$  nm,  $\lambda_{\text{em}} = 565$  nm) and the instrument response function (red). Right: Fitting parameters including pre-exponential factors and confidence limits.

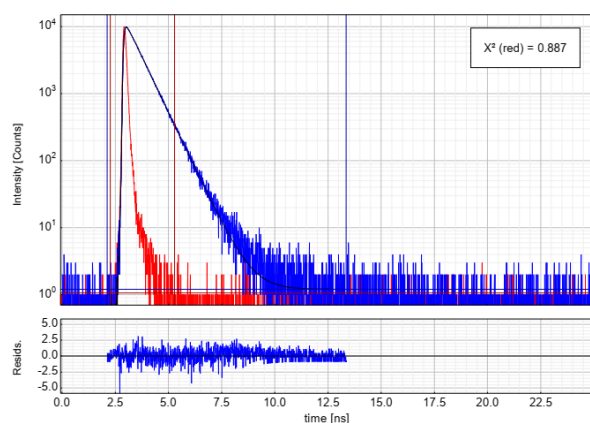

| Parameter                | Value    | Conf. Lower | Conf. Upper | Conf. Estimation |
|--------------------------|----------|-------------|-------------|------------------|
| A <sub>1</sub> [Cnts]    | 12198.2  | -70.0       | +70.0       | Fitting          |
| τ <sub>1</sub> [ns]      | 0.65186  | -0.00263    | +0.00263    | Fitting          |
| Bkgr. Dec [Cnts]         | 1.207    | -0.337      | +0.337      | Fitting          |
| Bkgr. IRR [Cnts]         | 1.063    | -0.674      | +0.674      | Fitting          |
| Shift IRR [ns]           | -0.07080 | -0.00111    | +0.00111    | Fitting          |
| A <sub>Scat</sub> [Cnts] | 56510    | -2410       | +2410       | Fitting          |

**Figure S82:** Left: Time-resolved photoluminescence decay of **NMe<sub>2</sub>** (blue) at 298 K (air-equilibrated) in a THF/water mixture (50/50), including the residuals ( $\lambda_{\text{exc}} = 376$  nm,  $\lambda_{\text{em}} = 565$  nm) and the instrument response function (red). Right: Fitting parameters including pre-exponential factors and confidence limits.

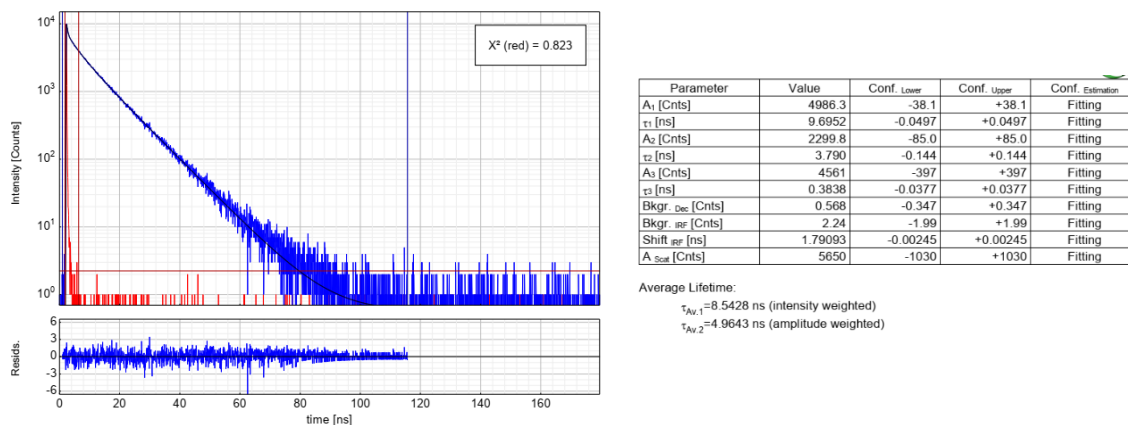

**Figure S83:** Left: Time-resolved photoluminescence decay of **NMe<sub>2</sub>** (blue) at 298 K (air-equilibrated) in a THF/water mixture (30/70), including the residuals ( $\lambda_{exc} = 376$  nm,  $\lambda_{em} = 565$  nm) and the instrument response function (red). Right: Fitting parameters including pre-exponential factors and confidence limits.

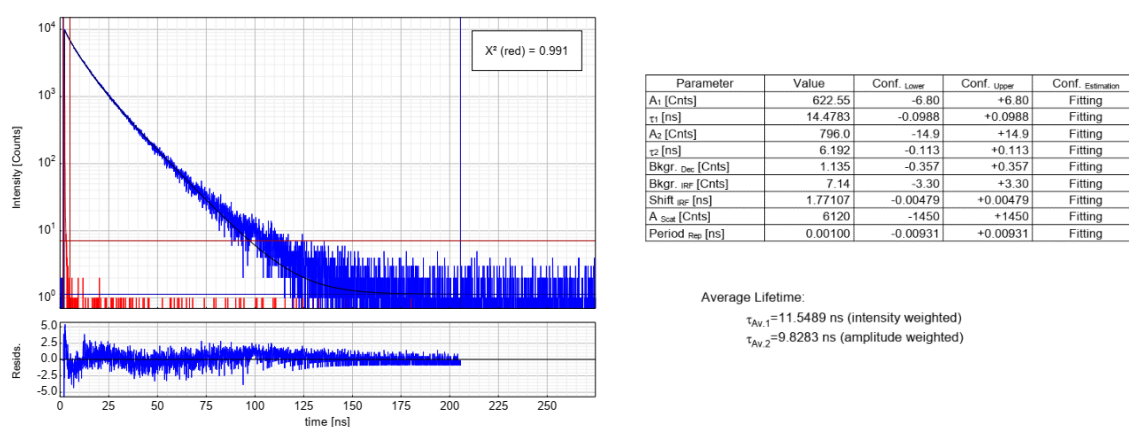

**Figure S84:** Left: Time-resolved photoluminescence decay of **NMe<sub>2</sub>** (blue) at 298 K (air-equilibrated) in a THF/water mixture (20/80), including the residuals ( $\lambda_{exc} = 376$  nm,  $\lambda_{em} = 565$  nm) and the instrument response function (red). Right: Fitting parameters including pre-exponential factors and confidence limits.

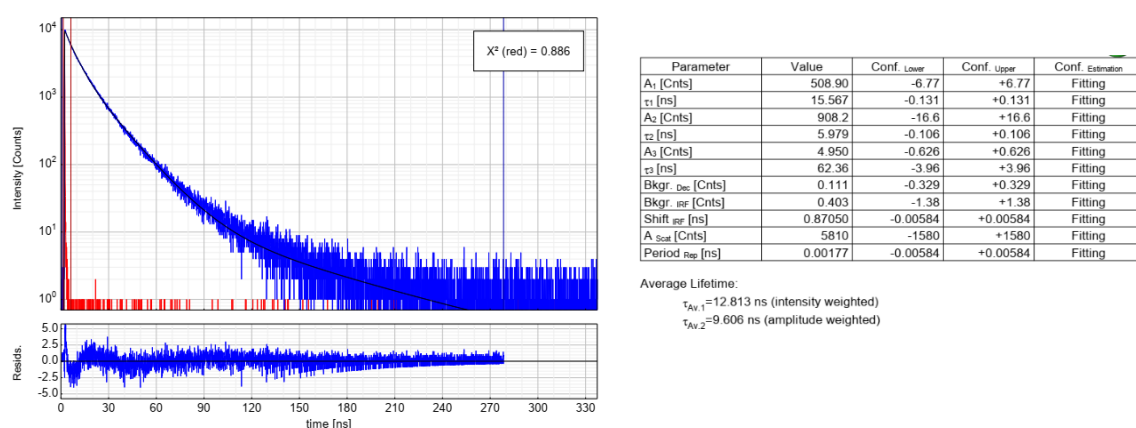

**Figure S85:** Left: Time-resolved photoluminescence decay of **NMe<sub>2</sub>** (blue) at 298 K (air-equilibrated) in a THF/water mixture (10/90), including the residuals ( $\lambda_{exc} = 376$  nm,  $\lambda_{em} = 565$  nm) and the instrument response function (red). Right: Fitting parameters including pre-exponential factors and confidence limits.

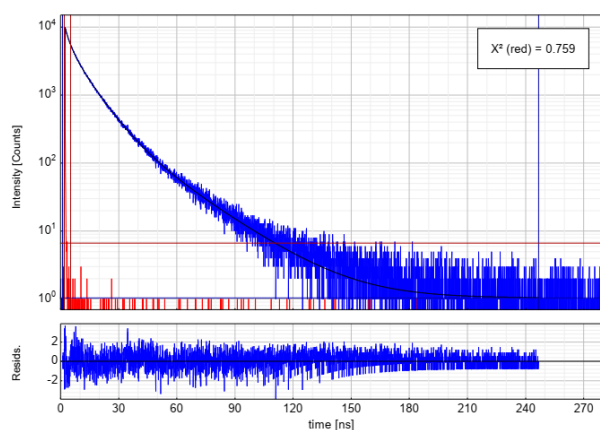

| Parameter         | Value   | Conf. Lower | Conf. Upper | Conf. Estimation |
|-------------------|---------|-------------|-------------|------------------|
| $A_1$ [Cnts]      | 96.39   | -2.88       | +2.88       | Fitting          |
| $\tau_1$ [ns]     | 22.730  | -0.354      | +0.354      | Fitting          |
| $A_2$ [Cnts]      | 776.43  | -9.25       | +9.25       | Fitting          |
| $\tau_2$ [ns]     | 8.9484  | -0.0838     | +0.0838     | Fitting          |
| $A_3$ [Cnts]      | 602.3   | -25.9       | +25.9       | Fitting          |
| $\tau_3$ [ns]     | 2.350   | -0.112      | +0.112      | Fitting          |
| Bkgr. Dec [Cnts]  | 1.039   | -0.308      | +0.308      | Fitting          |
| Bkgr. sep [Cnts]  | 6.69    | -3.53       | +3.53       | Fitting          |
| Shift sep [ns]    | 1.92359 | -0.00519    | +0.00519    | Fitting          |
| $A_{scat}$ [Cnts] | 9170    | -1320       | +1320       | Fitting          |
| Period sep [ns]   | 0.01142 | -0.00222    | +0.00222    | Fitting          |

Average Lifetime:

$$\tau_{Av,1} = 10.924 \text{ ns (intensity weighted)}$$

$$\tau_{Av,2} = 7.155 \text{ ns (amplitude weighted)}$$

**Figure S86:** Left: Time-resolved photoluminescence decay of **NMe<sub>2</sub>** (blue) at 298 K (air-equilibrated) in a THF/water mixture (5/95), including the residuals ( $\lambda_{exc} = 376$  nm,  $\lambda_{em} = 565$  nm) and the instrument response function (red). Right: Fitting parameters including pre-exponential factors and confidence limits.

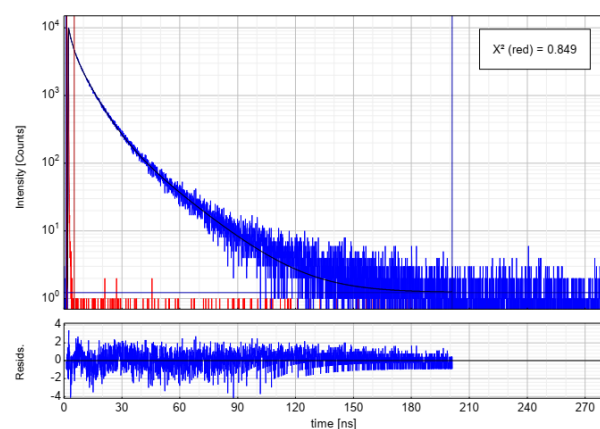

| Parameter         | Value   | Conf. Lower | Conf. Upper | Conf. Estimation |
|-------------------|---------|-------------|-------------|------------------|
| $A_1$ [Cnts]      | 100.31  | -2.88       | +2.88       | Fitting          |
| $\tau_1$ [ns]     | 19.144  | -0.292      | +0.292      | Fitting          |
| $A_2$ [Cnts]      | 731.82  | -9.75       | +9.75       | Fitting          |
| $\tau_2$ [ns]     | 7.0801  | -0.0751     | +0.0751     | Fitting          |
| $A_3$ [Cnts]      | 671.0   | -29.3       | +29.3       | Fitting          |
| $\tau_3$ [ns]     | 1.7091  | -0.0824     | +0.0824     | Fitting          |
| Bkgr. Dec [Cnts]  | 1.233   | -0.343      | +0.343      | Fitting          |
| Bkgr. sep [Cnts]  | -0.086  | -1.91       | +1.91       | Fitting          |
| Shift sep [ns]    | 0.19269 | -0.00515    | +0.00515    | Fitting          |
| $A_{scat}$ [Cnts] | 8820    | -1320       | +1320       | Fitting          |
| Period sep [ns]   | 0.00873 | -0.00238    | +0.00238    | Fitting          |

Average Lifetime:

$$\tau_{Av,1} = 9.142 \text{ ns (intensity weighted)}$$

$$\tau_{Av,2} = 5.487 \text{ ns (amplitude weighted)}$$

**Figure S87:** Left: Time-resolved photoluminescence decay of **NMe<sub>2</sub>** (blue) at 298 K (air-equilibrated) in a THF/water mixture (1/99), including the residuals ( $\lambda_{exc} = 376$  nm,  $\lambda_{em} = 565$  nm) and the instrument response function (red). Right: Fitting parameters including pre-exponential factors and confidence limits.

| H <sub>2</sub> O content (%) | [H]<br>$\phi_F \pm 2$ (%) | [Me]<br>$\phi_F \pm 2$ (%) | [t-Bu]<br>$\phi_F \pm 2$ (%) | [OMe]<br>$\phi_F \pm 2$ (%) | [SMe]<br>$\phi_F \pm 2$ (%) | [NMe <sub>2</sub> ]<br>$\phi_F \pm 2$ (%) |
|------------------------------|---------------------------|----------------------------|------------------------------|-----------------------------|-----------------------------|-------------------------------------------|
| 0                            | 15                        | 22                         | 24                           | 35                          | 28                          | 36                                        |
| 30                           | 29                        | 38                         | 38                           | 50                          | 24                          | 3                                         |
| 50                           | 27                        | 34                         | 36                           | 43                          | 26                          | 2                                         |
| 70                           | 27                        | 36                         | 31                           | 39                          | 24                          | 4                                         |
| 80                           | 18                        | 36                         | 35                           | 30                          | 24                          | 26                                        |
| 90                           | 14                        | 32                         | 32                           | 25                          | 19                          | 26                                        |
| 95                           | 13                        | 34                         | 30                           | 24                          | 19                          | 21                                        |
| 99                           | 11                        | 32                         | 29                           | 20                          | 15                          | 20                                        |

**Table S4:** Photoluminescence quantum yields ( $\phi_F$ ) at room temperature of the naphtalonitriles in different THF/water mixtures.

| Sample                 | $\phi_F \pm 4$ (%) | $\tau_{(77\text{ K})} / \text{ns}$ |
|------------------------|--------------------|------------------------------------|
| <b>H</b>               | 78                 | $36.8 \pm 0.8$                     |
| <b>Me</b>              | 83                 | $28.8 \pm 0.9$                     |
| <b>Tert-butyl</b>      | 63                 | $28.1 \pm 1.0$                     |
| <b>OMe</b>             | 96                 | $11.2 \pm 0.4$                     |
| <b>SMe</b>             | 96                 | $7.4 \pm 0.2$                      |
| <b>NMe<sub>2</sub></b> | 96                 | $8.11 \pm 0.03$                    |

**Table S5:** Photoluminescence quantum yields ( $\phi_F$ ) and lifetimes at 77 K in a 2-methyl THF glassy matrix of the naphthalonitriles.

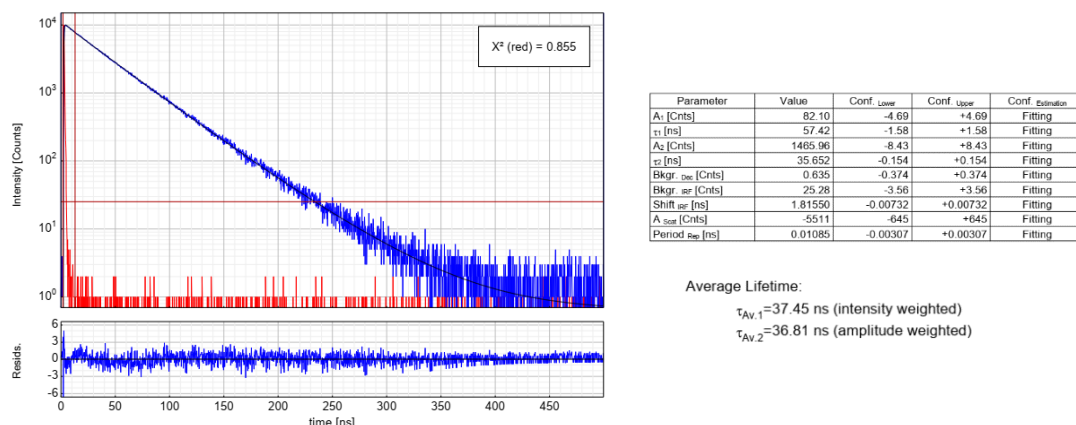

**Figure S88:** Left: Time-resolved photoluminescence decay of **H** (blue) at 77 K in a 2-Methyl THF glassy matrix, including the residuals ( $\lambda_{\text{exc}} = 325 \text{ nm}$ ,  $\lambda_{\text{em}} = 420 \text{ nm}$ ) and the instrument response function (red). Right: Fitting parameters including pre-exponential factors and confidence limits.

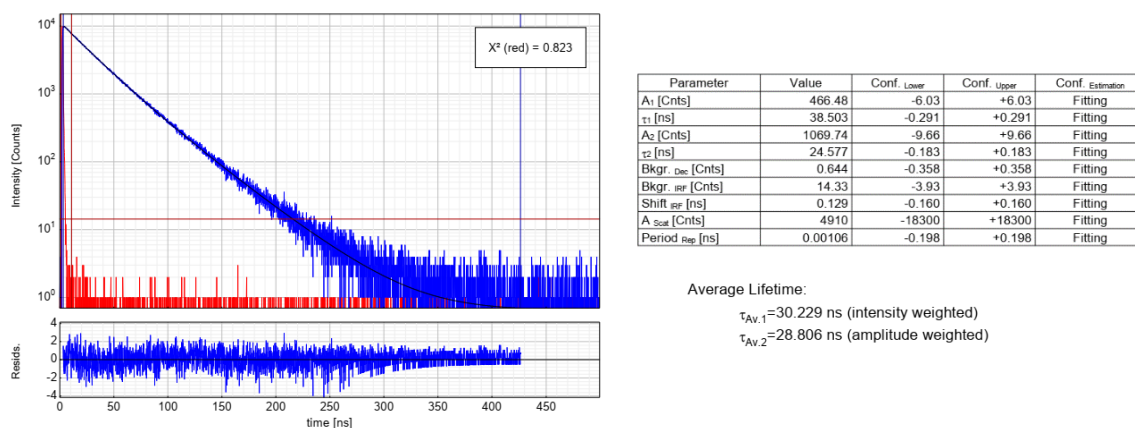

**Figure S89:** Left: Time-resolved photoluminescence decay of **Me** (blue) at 77 K in a 2-Methyl THF glassy matrix, including the residuals ( $\lambda_{\text{exc}} = 325 \text{ nm}$ ,  $\lambda_{\text{em}} = 430 \text{ nm}$ ) and the instrument response function (red). Right: Fitting parameters including pre-exponential factors and confidence limits.



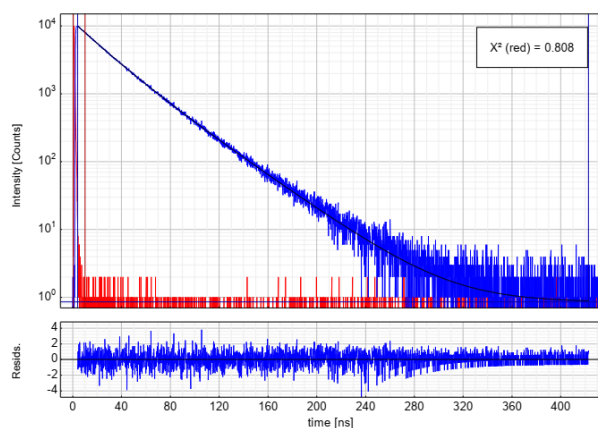

| Parameter                | Value  | Conf. Lower | Conf. Upper | Conf. Estimation |
|--------------------------|--------|-------------|-------------|------------------|
| A <sub>1</sub> [Cnts]    | 768.60 | -6.67       | +6.67       | Fitting          |
| τ <sub>1</sub> [ns]      | 35.397 | -0.189      | +0.189      | Fitting          |
| A <sub>2</sub> [Cnts]    | 824.7  | -11.4       | +11.4       | Fitting          |
| τ <sub>2</sub> [ns]      | 21.199 | -0.243      | +0.243      | Fitting          |
| Bkgr. Dec [Cnts]         | 0.855  | -0.359      | +0.359      | Fitting          |
| Bkgr. IRF [Cnts]         | -6.27  | -4.01       | +4.01       | Fitting          |
| Shift IRF [ns]           | 0.511  | -0.162      | +0.162      | Fitting          |
| A <sub>Scat</sub> [Cnts] | 159000 | -807000     | +807000     | Fitting          |
| Period Rep [ns]          | 0.232  | -0.786      | +0.786      | Fitting          |

Average Lifetime:

$$\tau_{AV,1} = 29.842 \text{ ns (intensity weighted)}$$

$$\tau_{AV,2} = 28.048 \text{ ns (amplitude weighted)}$$

**Figure S90:** Left: Time-resolved photoluminescence decay of **t-Bu** (blue) at 77 K in a 2-Methyl THF glassy matrix, including the residuals ( $\lambda_{exc} = 325 \text{ nm}$ ,  $\lambda_{em} = 430 \text{ nm}$ ) and the instrument response function (red). Right: Fitting parameters including pre-exponential factors and confidence limits.

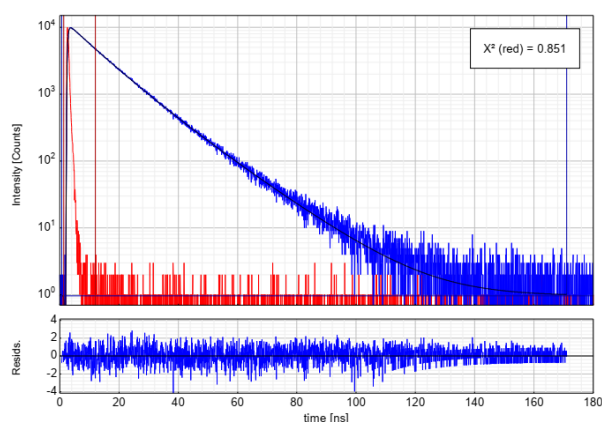

| Parameter                | Value   | Conf. Lower | Conf. Upper | Conf. Estimation |
|--------------------------|---------|-------------|-------------|------------------|
| A <sub>1</sub> [Cnts]    | 522.73  | -6.31       | +6.31       | Fitting          |
| τ <sub>1</sub> [ns]      | 14.892  | -0.106      | +0.106      | Fitting          |
| A <sub>2</sub> [Cnts]    | 1083.2  | -10.2       | +10.2       | Fitting          |
| τ <sub>2</sub> [ns]      | 9.3441  | -0.0737     | +0.0737     | Fitting          |
| Bkgr. Dec [Cnts]         | 0.963   | -0.375      | +0.375      | Fitting          |
| Bkgr. IRF [Cnts]         | 0.62    | -2.75       | +2.75       | Fitting          |
| Shift IRF [ns]           | 0.20374 | -0.00876    | +0.00876    | Fitting          |
| A <sub>Scat</sub> [Cnts] | 5970    | -1830       | +1830       | Fitting          |
| Period Rep [ns]          | 0.00726 | -0.00851    | +0.00851    | Fitting          |

Average Lifetime:

$$\tau_{AV,1} = 11.756 \text{ ns (intensity weighted)}$$

$$\tau_{AV,2} = 11.150 \text{ ns (amplitude weighted)}$$

**Figure S91:** Left: Time-resolved photoluminescence decay of **OMe** (blue) at 77 K in a 2-Methyl THF glassy matrix, including the residuals ( $\lambda_{exc} = 325 \text{ nm}$ ,  $\lambda_{em} = 450 \text{ nm}$ ) and the instrument response function (red). Right: Fitting parameters including pre-exponential factors and confidence limits.

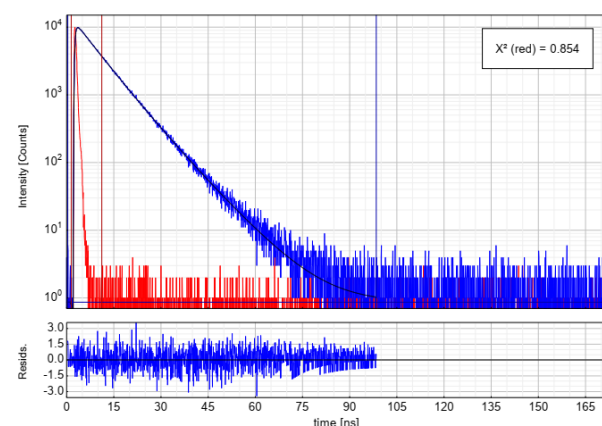

| Parameter                | Value   | Conf. Lower | Conf. Upper | Conf. Estimation |
|--------------------------|---------|-------------|-------------|------------------|
| A <sub>1</sub> [Cnts]    | 442.76  | -6.21       | +6.21       | Fitting          |
| τ <sub>1</sub> [ns]      | 9.6825  | -0.0757     | +0.0757     | Fitting          |
| A <sub>2</sub> [Cnts]    | 1224.98 | -9.24       | +9.24       | Fitting          |
| τ <sub>2</sub> [ns]      | 6.6143  | -0.0405     | +0.0405     | Fitting          |
| Bkgr. Dec [Cnts]         | 0.870   | -0.415      | +0.415      | Fitting          |
| Bkgr. IRF [Cnts]         | 0.52    | -1.91       | +1.91       | Fitting          |
| Shift IRF [ns]           | 0.11135 | -0.00651    | +0.00651    | Fitting          |
| A <sub>Scat</sub> [Cnts] | 13280   | -1470       | +1470       | Fitting          |
| Period Rep [ns]          | 0.01706 | -0.00384    | +0.00384    | Fitting          |

Average Lifetime:

$$\tau_{AV,1} = 7.6760 \text{ ns (intensity weighted)}$$

$$\tau_{AV,2} = 7.4289 \text{ ns (amplitude weighted)}$$

**Figure S92:** Left: Time-resolved photoluminescence decay of **SMe** (blue) at 77 K in a 2-Methyl THF glassy matrix, including the residuals ( $\lambda_{exc} = 325 \text{ nm}$ ,  $\lambda_{em} = 480 \text{ nm}$ ) and the instrument response function (red). Right: Fitting parameters including pre-exponential factors and confidence limits.

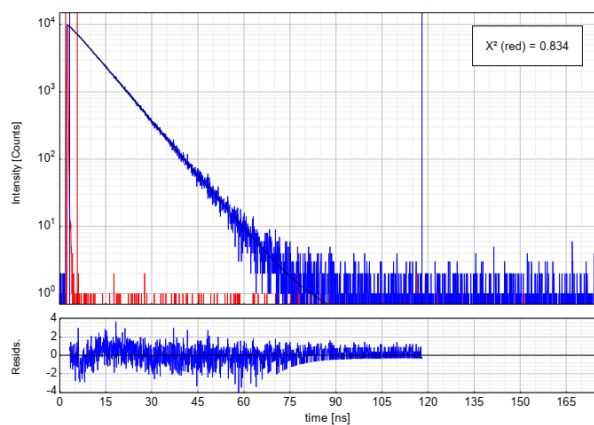

| Parameter                | Value   | Conf. Lower | Conf. Upper | Conf. Estimation |
|--------------------------|---------|-------------|-------------|------------------|
| $A_1$ [Cnts]             | 1463.52 | -7.96       | +7.96       | Fitting          |
| $\tau_1$ [ns]            | 8.1142  | -0.0304     | +0.0304     | Fitting          |
| Bkgr. Dec [Cnts]         | 0.393   | -0.320      | +0.320      | Fitting          |
| Bkgr. IRF [Cnts]         | -21.58  | -2.86       | +2.86       | Fitting          |
| Shift IRF [ns]           | 0.4306  | -0.0464     | +0.0464     | Fitting          |
| $A_{\text{scat}}$ [Cnts] | -239000 | -101000     | +101000     | Fitting          |
| Period Rep [ns]          | 0.157   | -0.109      | +0.109      | Fitting          |

**Figure S93:** Left: Time-resolved photoluminescence decay of **NMe<sub>2</sub>** (blue) at 77 K in a 2-Methyl THF glassy matrix, including the residuals ( $\lambda_{\text{exc}} = 375$  nm,  $\lambda_{\text{em}} = 560$  nm) and the instrument response function (red). Right: Fitting parameters including pre-exponential factors and confidence limits.

## Section S7: Dynamic light scattering measurements

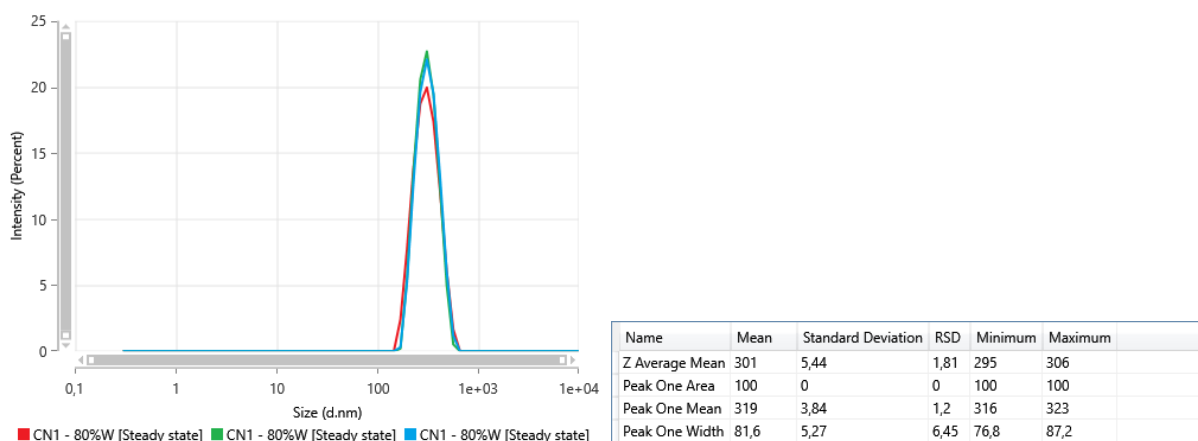

**Figure S94:** Left: Size distribution of H as aggregates in 80% H<sub>2</sub>O/20% THF. Right: Statistical data for the size distribution.

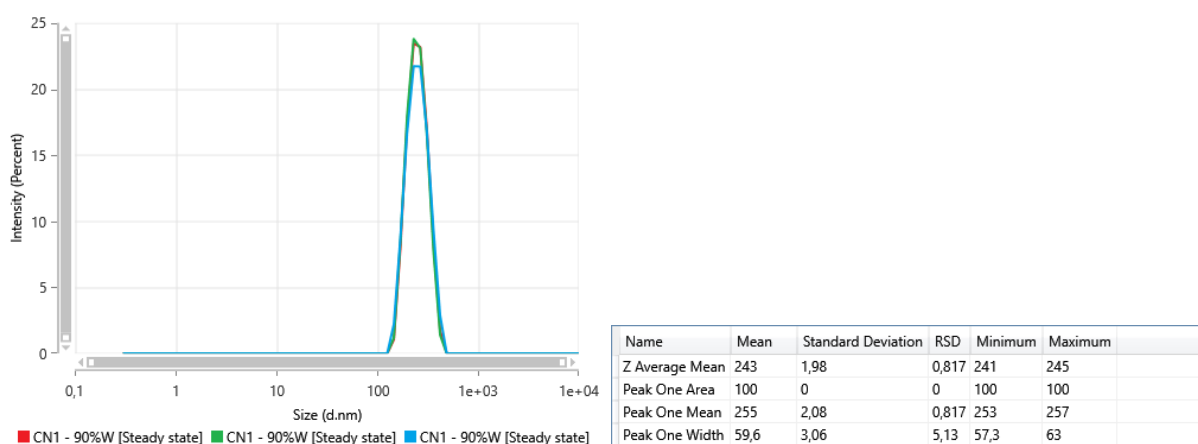

**Figure S95:** Left: Size distribution of H as aggregates in 90% H<sub>2</sub>O/10% THF. Right: Statistical data for the size distribution.

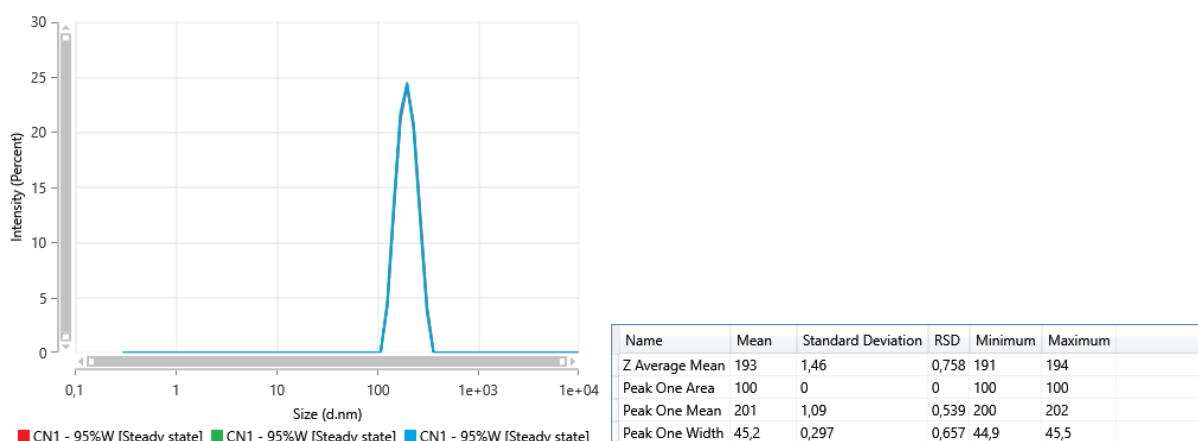

**Figure S96:** Left: Size distribution of H as aggregates in 95% H<sub>2</sub>O/5% THF. Right: Statistical data for the size distribution.

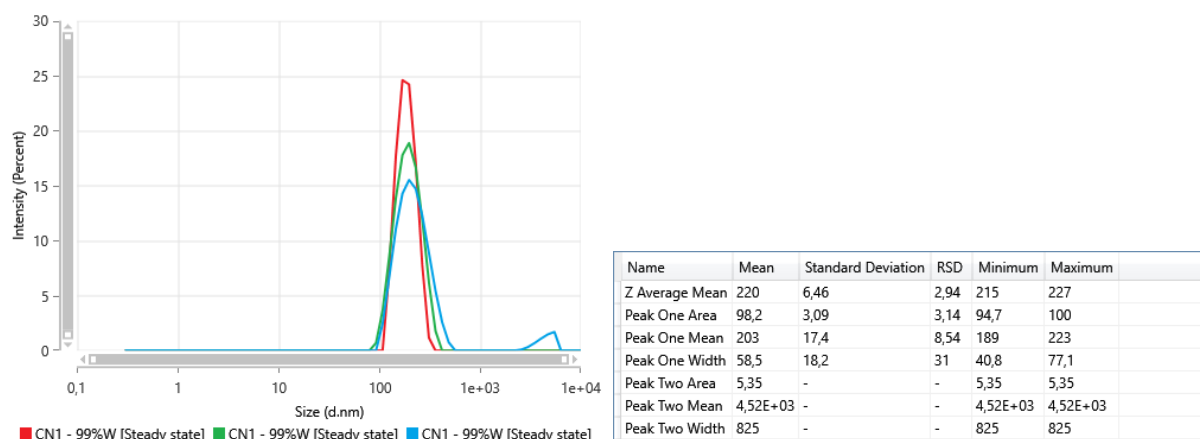

**Figure S97:** Left: Size distribution of **H** as aggregates in 99% H<sub>2</sub>O/1% THF. Right: Statistical data for the size distribution.

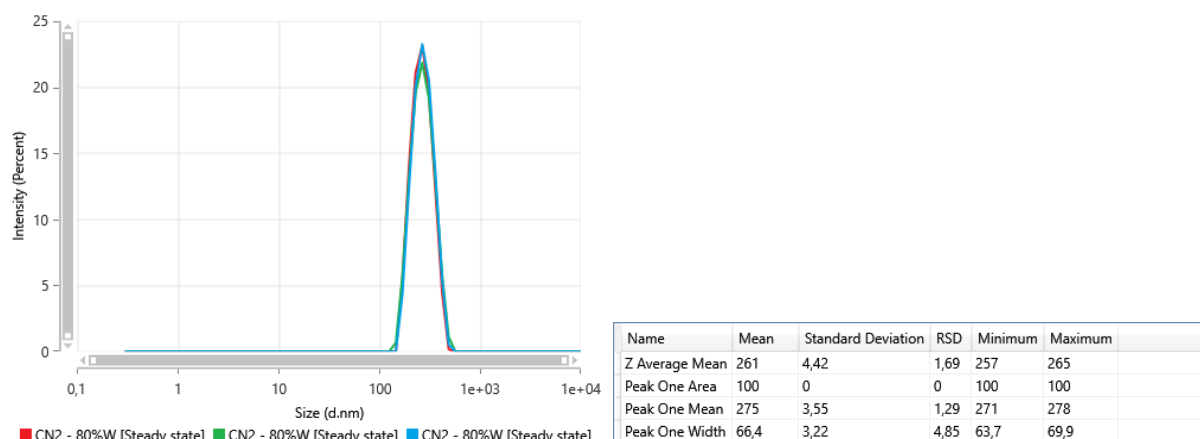

**Figure S98:** Left: Size distribution of **Me** as aggregates in 80% H<sub>2</sub>O/20% THF. Right: Statistical data for the size distribution.

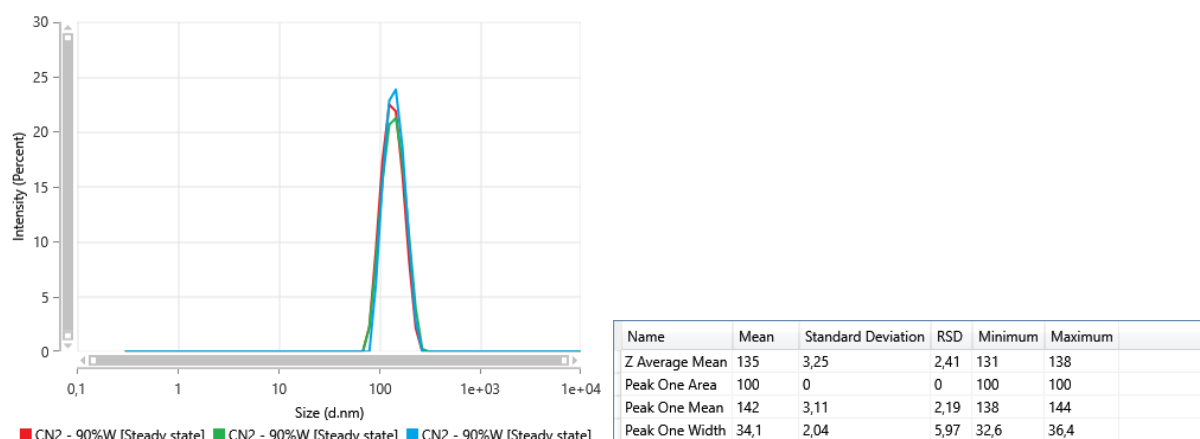

**Figure S99:** Left: Size distribution of **Me** as aggregates in 90% H<sub>2</sub>O/10% THF. Right: Statistical data for the size distribution.

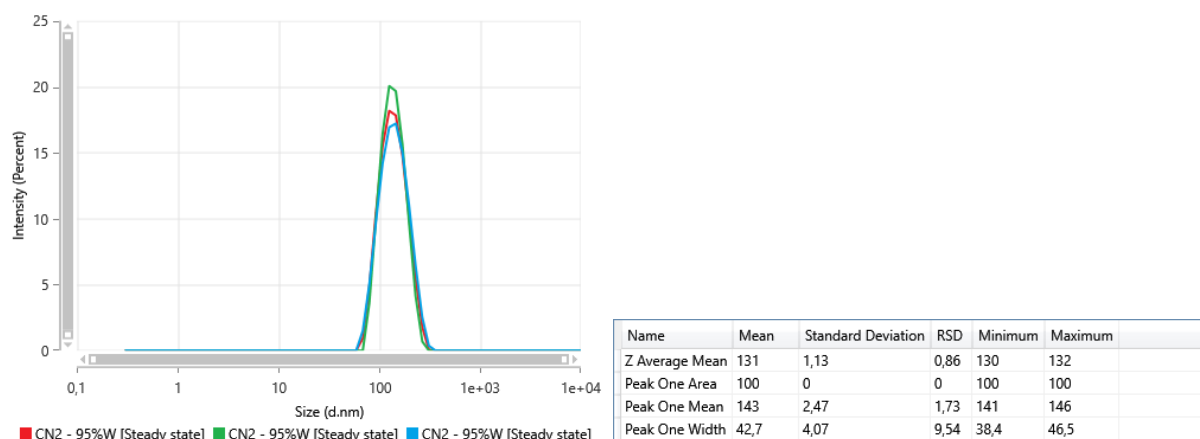

**Figure S100:** Left: Size distribution of **Me** as aggregates in 95% H<sub>2</sub>O/5% THF. Right: Statistical data for the size distribution.

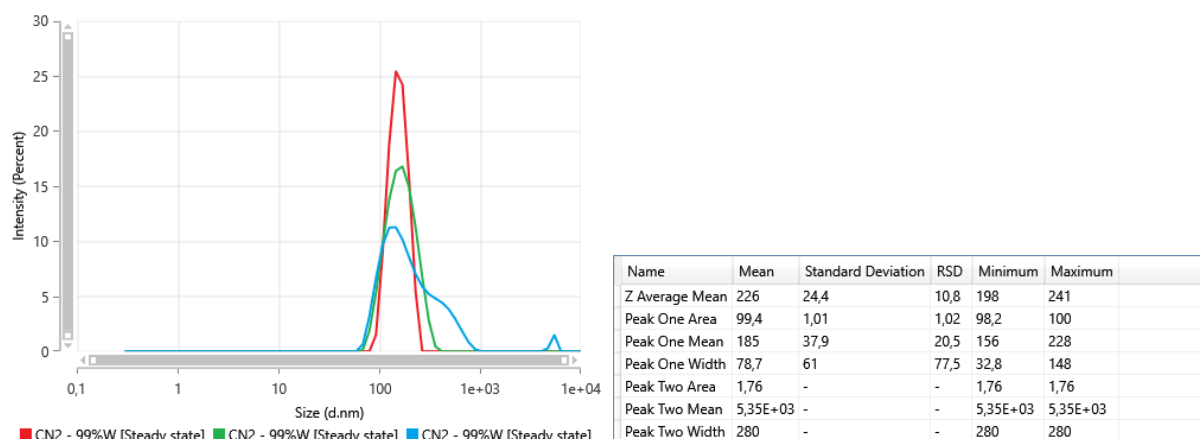

**Figure S101:** Left: Size distribution of **Me** as aggregates in 99% H<sub>2</sub>O/1% THF. Right: Statistical data for the size distribution.

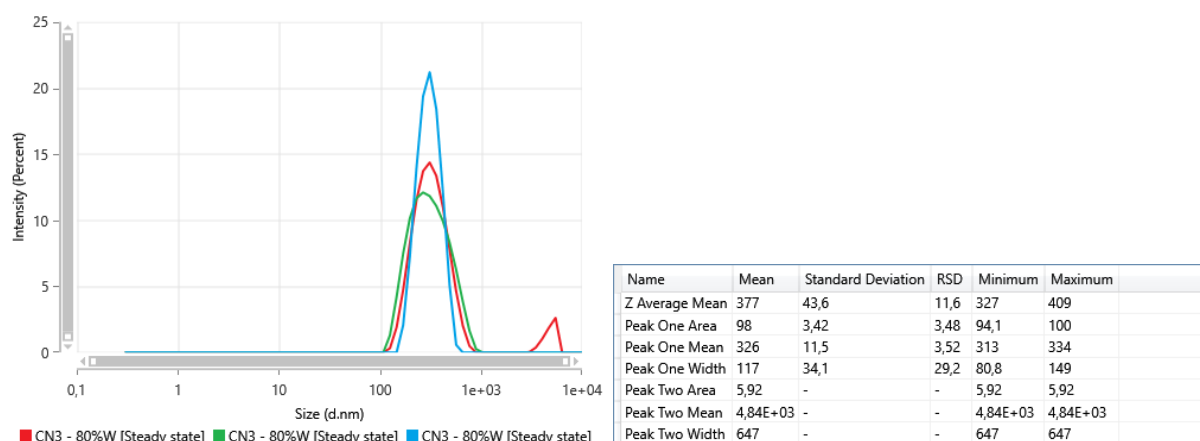

**Figure S102:** Left: Size distribution of **t-Bu** as aggregates in 80% H<sub>2</sub>O/20% THF. Right: Statistical data for the size distribution.

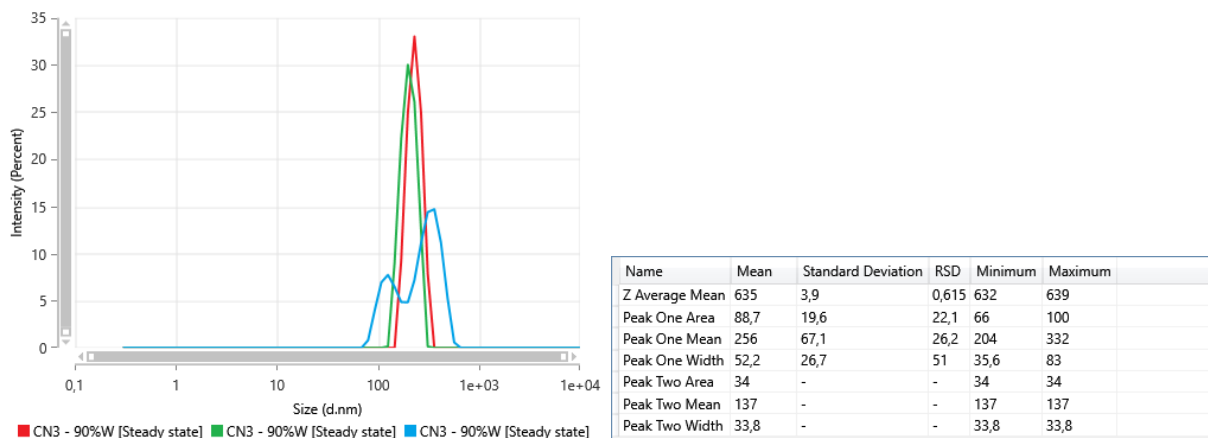

**Figure S103:** Left: Size distribution of **t-Buas** aggregates in 90% H<sub>2</sub>O/10% THF. Right: Statistical data for the size distribution.

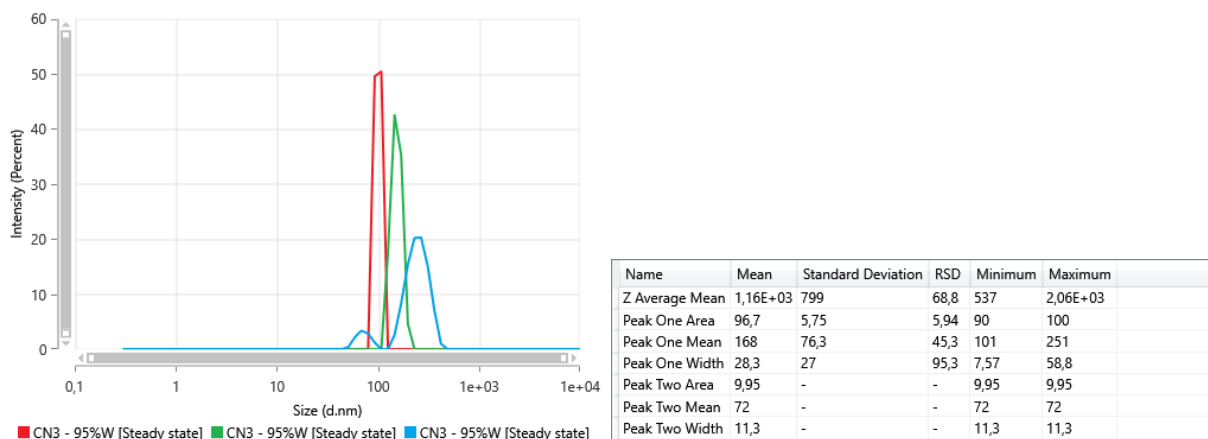

**Figure S104:** Left: Size distribution of **t-Bu** as aggregates in 95% H<sub>2</sub>O/5% THF. Right: Statistical data for the size distribution.

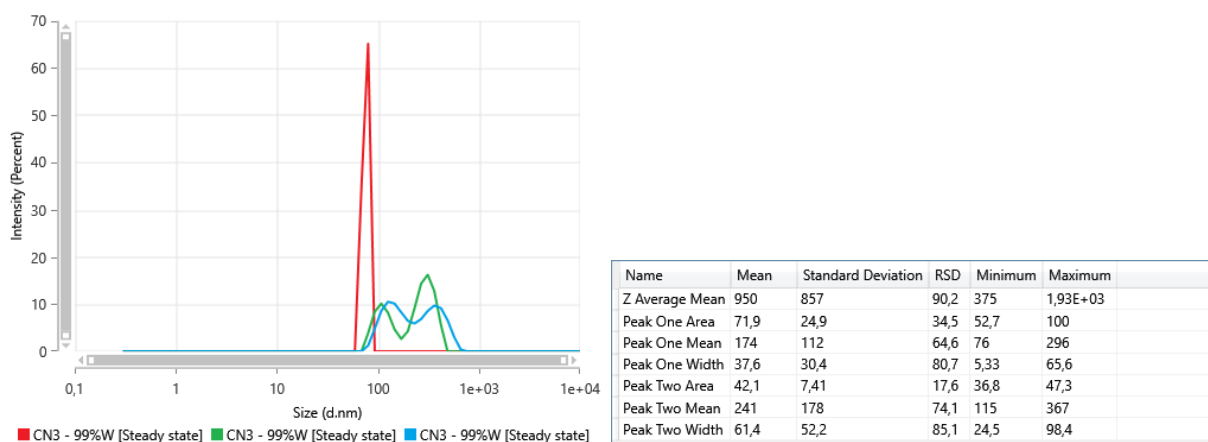

**Figure S105:** Left: Size distribution of **t-Bu** as aggregates in 99% H<sub>2</sub>O/1% THF. Right: Statistical data for the size distribution.

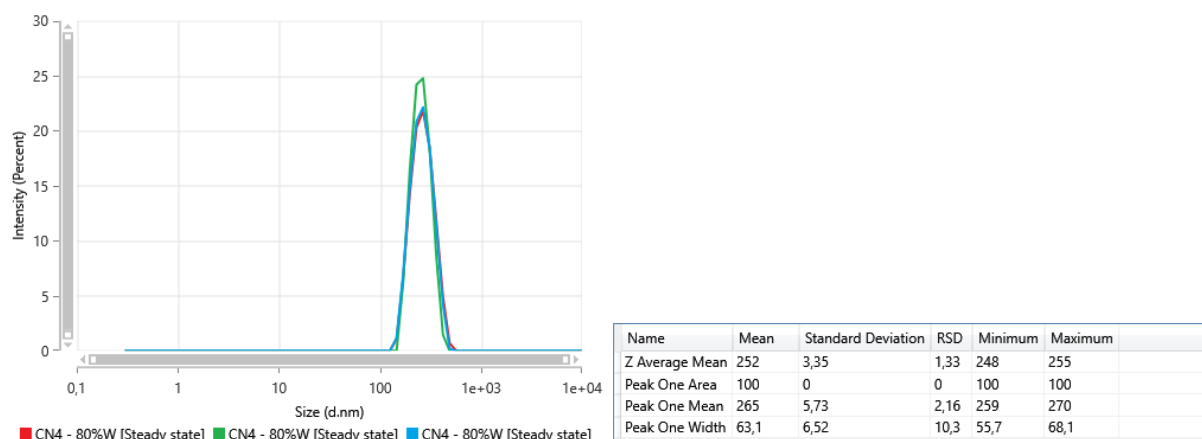

**Figure S106:** Left: Size distribution of **OMe** as aggregates in 80% H<sub>2</sub>O/20% THF. Right: Statistical data for the size distribution.

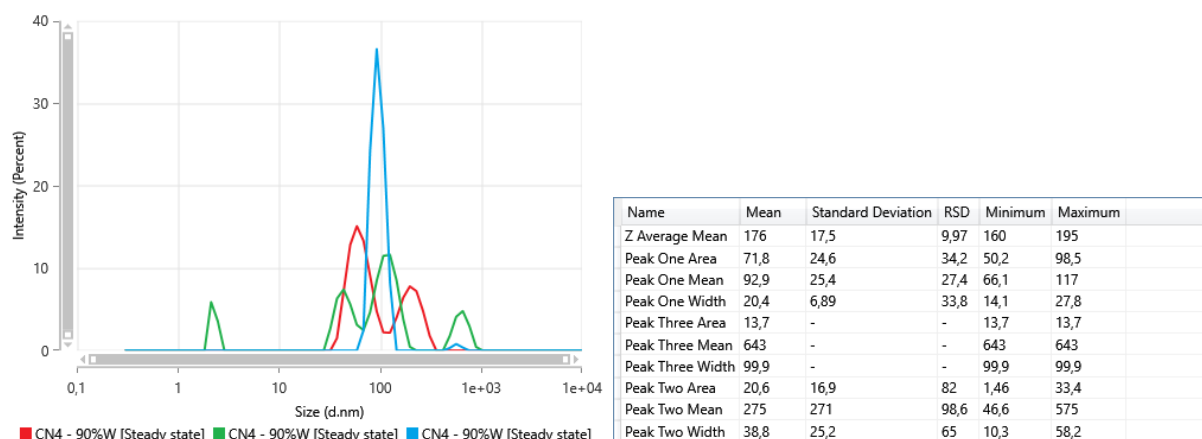

**Figure S107:** Left: Size distribution of **OMe** as aggregates in 90% H<sub>2</sub>O/10% THF. Right: Statistical data for the size distribution.

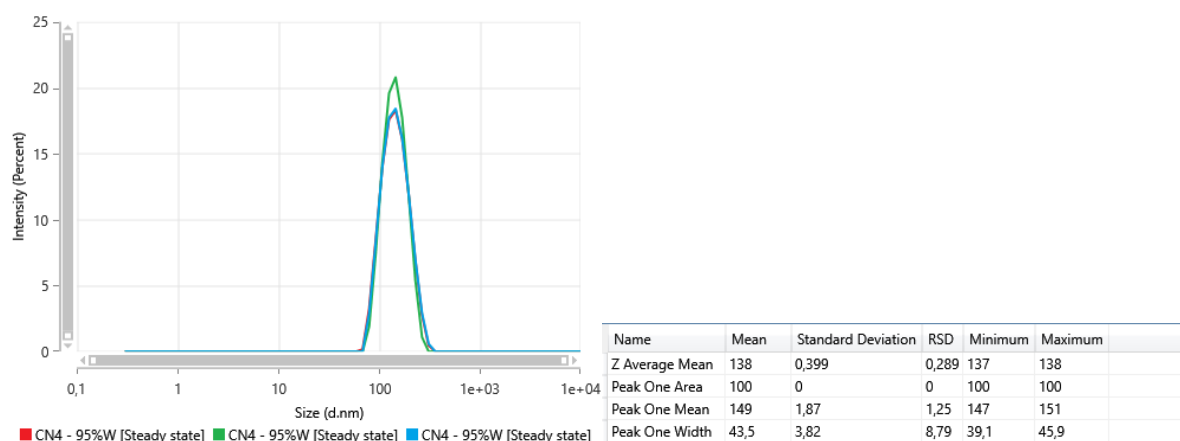

**Figure S108:** Left: Size distribution of **OMe** as aggregates in 95% H<sub>2</sub>O/5% THF. Right: Statistical data for the size distribution.

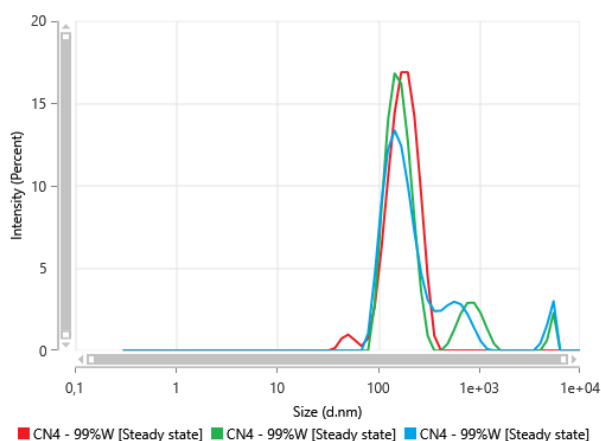

| Name             | Mean     | Standard Deviation | RSD  | Minimum  | Maximum  |
|------------------|----------|--------------------|------|----------|----------|
| Z Average Mean   | 234      | 37,9               | 16,2 | 210      | 277      |
| Peak One Area    | 86,2     | 9,93               | 11,5 | 78       | 97,2     |
| Peak One Mean    | 174      | 10,8               | 6,21 | 164      | 186      |
| Peak One Width   | 55,9     | 9,34               | 16,7 | 45,7     | 64       |
| Peak Three Area  | 3,86     | 1,37               | 35,6 | 2,89     | 4,84     |
| Peak Three Mean  | 5,21E+03 | 140                | 2,68 | 5,11E+03 | 5,31E+03 |
| Peak Three Width | 395      | 116                | 29,4 | 313      | 477      |
| Peak Two Area    | 11,2     | 7,52               | 67,1 | 2,76     | 17,2     |
| Peak Two Mean    | 500      | 410                | 82   | 51,8     | 857      |
| Peak Two Width   | 135      | 111                | 82,2 | 8,35     | 215      |

**Figure S109:** Left: Size distribution of **OMe** as aggregates in 99% H<sub>2</sub>O/1% THF. Right: Statistical data for the size distribution.

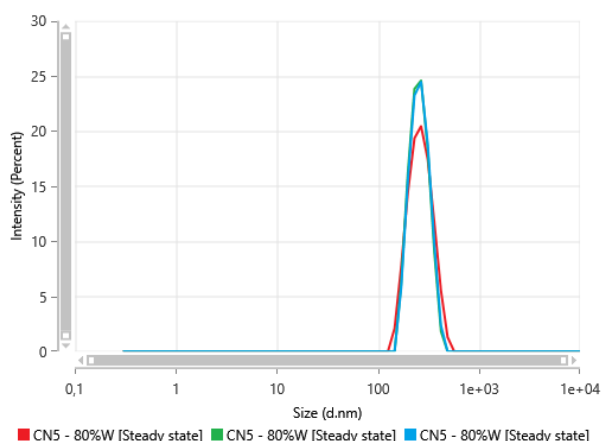

| Name           | Mean | Standard Deviation | RSD   | Minimum | Maximum |
|----------------|------|--------------------|-------|---------|---------|
| Z Average Mean | 251  | 1,77               | 0,706 | 249     | 252     |
| Peak One Area  | 100  | 0                  | 0     | 100     | 100     |
| Peak One Mean  | 264  | 4,92               | 1,86  | 260     | 270     |
| Peak One Width | 62,6 | 8,86               | 14,2  | 56,8    | 72,8    |

**Figure S110:** Left: Size distribution of **SMe** as aggregates in 80% H<sub>2</sub>O/20% THF. Right: Statistical data for the size distribution.

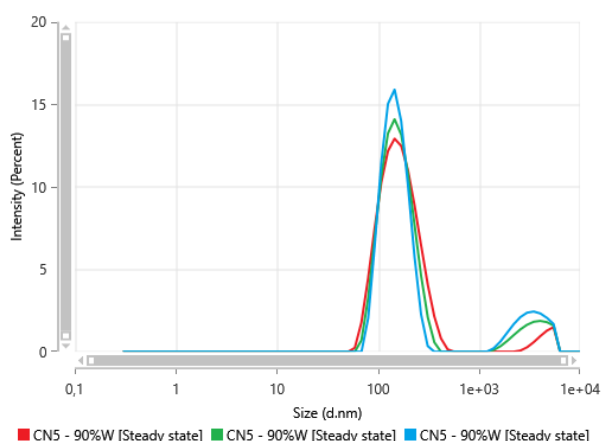

| Name           | Mean     | Standard Deviation | RSD  | Minimum  | Maximum  |
|----------------|----------|--------------------|------|----------|----------|
| Z Average Mean | 164      | 5,74               | 3,5  | 158      | 169      |
| Peak One Area  | 88,9     | 6,07               | 6,84 | 83,4     | 95,4     |
| Peak One Mean  | 161      | 9,38               | 5,84 | 151      | 170      |
| Peak One Width | 57,8     | 13,9               | 24   | 44,5     | 72,3     |
| Peak Two Area  | 11,1     | 6,07               | 54,5 | 4,62     | 16,6     |
| Peak Two Mean  | 3,83E+03 | 612                | 16   | 3,39E+03 | 4,53E+03 |
| Peak Two Width | 1,03E+03 | 183                | 17,8 | 820      | 1,14E+03 |

**Figure S111:** Left: Size distribution of **SMe** as aggregates in 90% H<sub>2</sub>O/10% THF. Right: Statistical data for the size distribution.



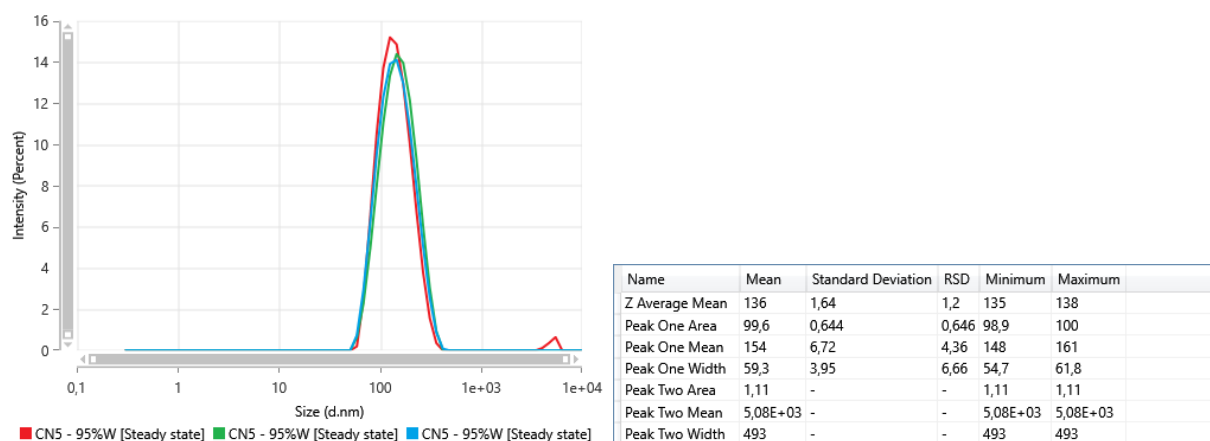

**Figure S112:** Left: Size distribution of **SMe** as aggregates in 95% H<sub>2</sub>O/5% THF. Right: Statistical data for the size distribution.

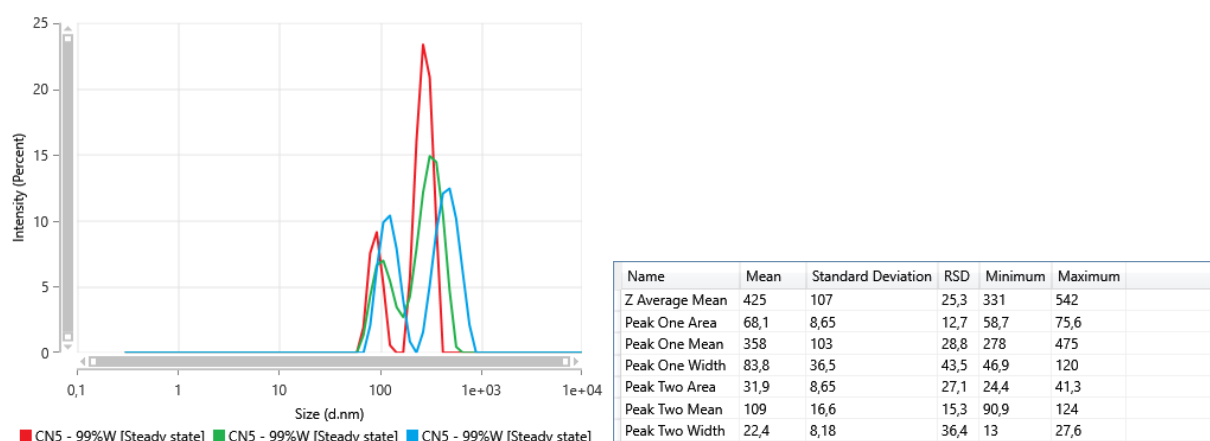

**Figure S113:** Left: Size distribution of **SMe** as aggregates in 99% H<sub>2</sub>O/1% THF. Right: Statistical data for the size distribution.

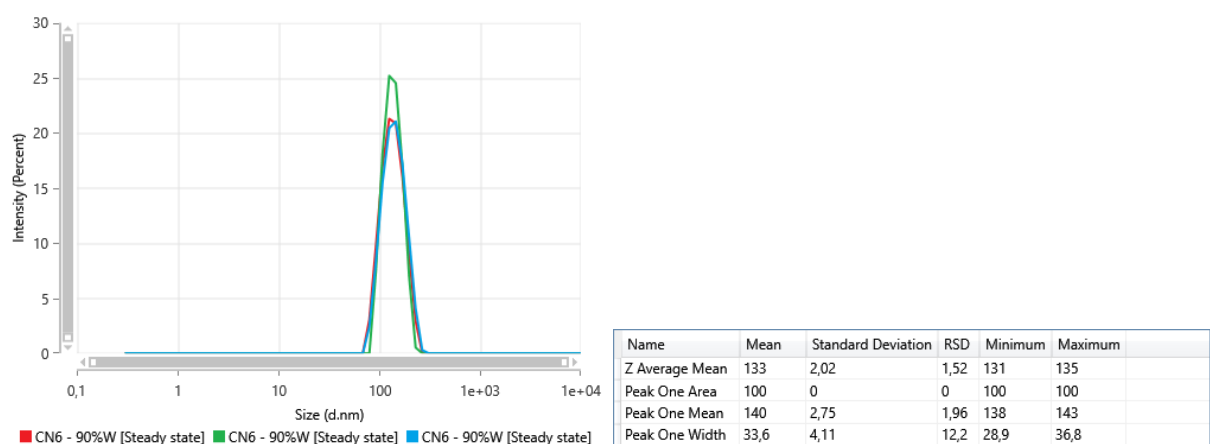

**Figure S114:** Left: Size distribution of **NMe<sub>2</sub>** as aggregates in 80% H<sub>2</sub>O/20% THF. Right: Statistical data for the size distribution.

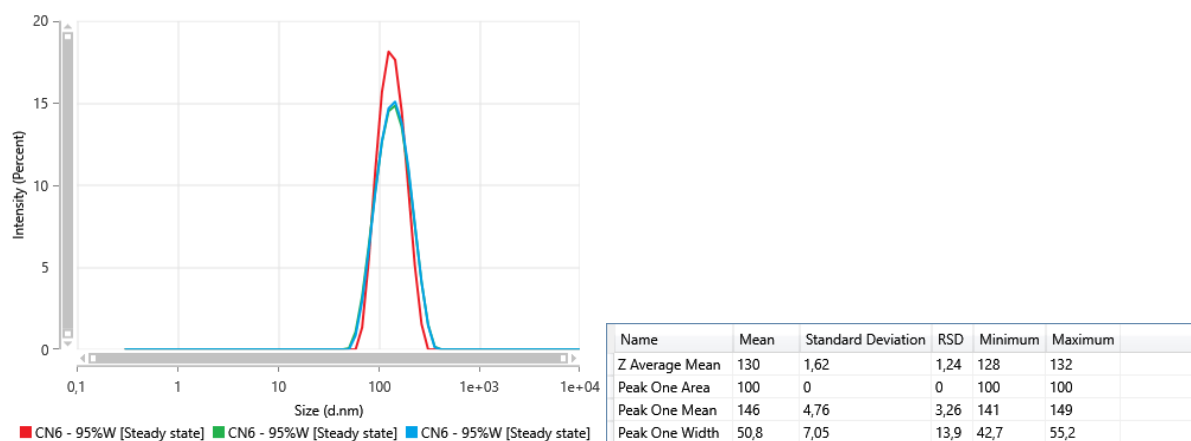

**Figure S115:** Left: Size distribution of **NMe<sub>2</sub>** as aggregates in 90% H<sub>2</sub>O/10% THF. Right: Statistical data for the size distribution.

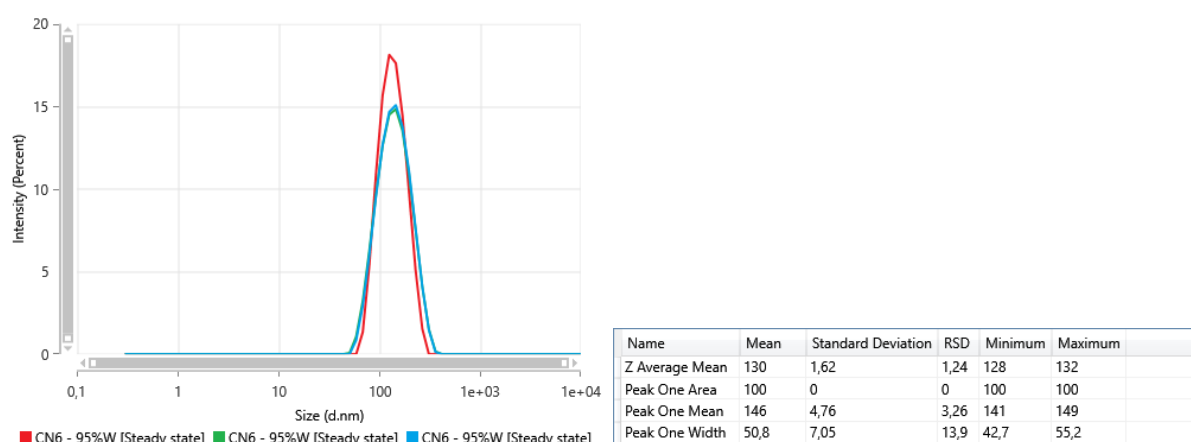

**Figure S116:** Left: Size distribution of **NMe<sub>2</sub>** as aggregates in 95% H<sub>2</sub>O/5% THF. Right: Statistical data for the size distribution.

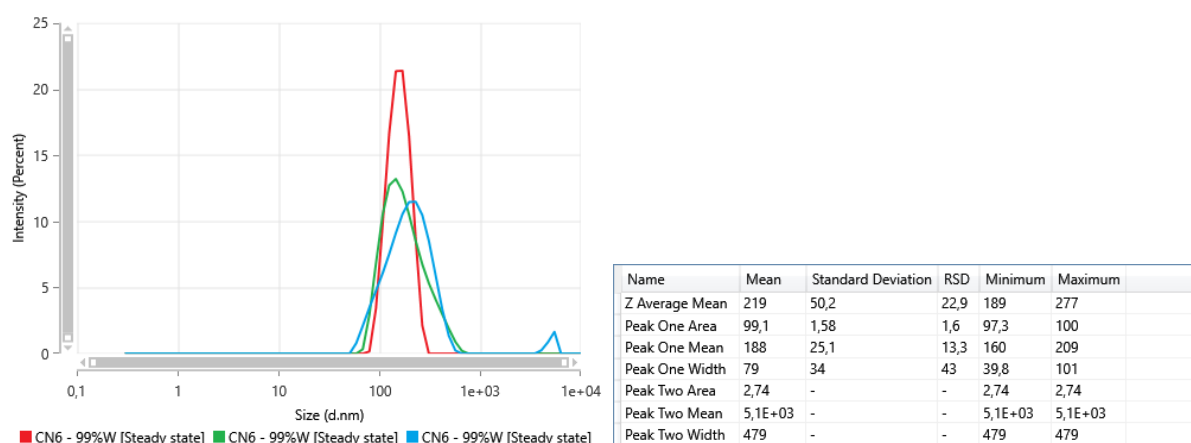

**Figure S117:** Left: Size distribution of **NMe<sub>2</sub>** as aggregates in 99% H<sub>2</sub>O/1% THF. Right: Statistical data for the size distribution.

## Section S8: Aggregation studies

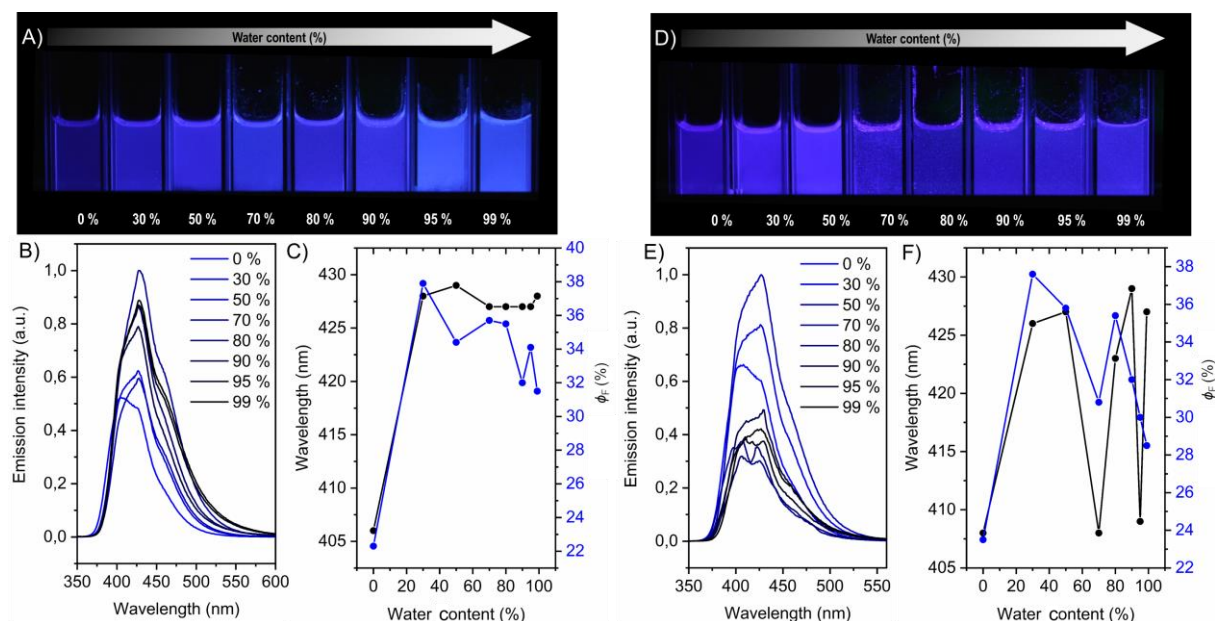

**Figure S118:** A) Photographs of **Me** at different THF-H<sub>2</sub>O ratios under UV excitation (λ = 365 nm). B) Photoluminescence spectra of **Me** at different THF-water ratios. C) Emission wavelength and φ<sub>F</sub> vs water content for **Me**. D) Photographs of **t-Bu** at different THF-H<sub>2</sub>O ratios under UV excitation (λ = 365 nm). E) Photoluminescence spectra of **t-Bu** at different THF-water ratios. F) Emission wavelength and φ<sub>F</sub> vs. water content for **t-Bu**. Concentration in all cases: 10 μM.

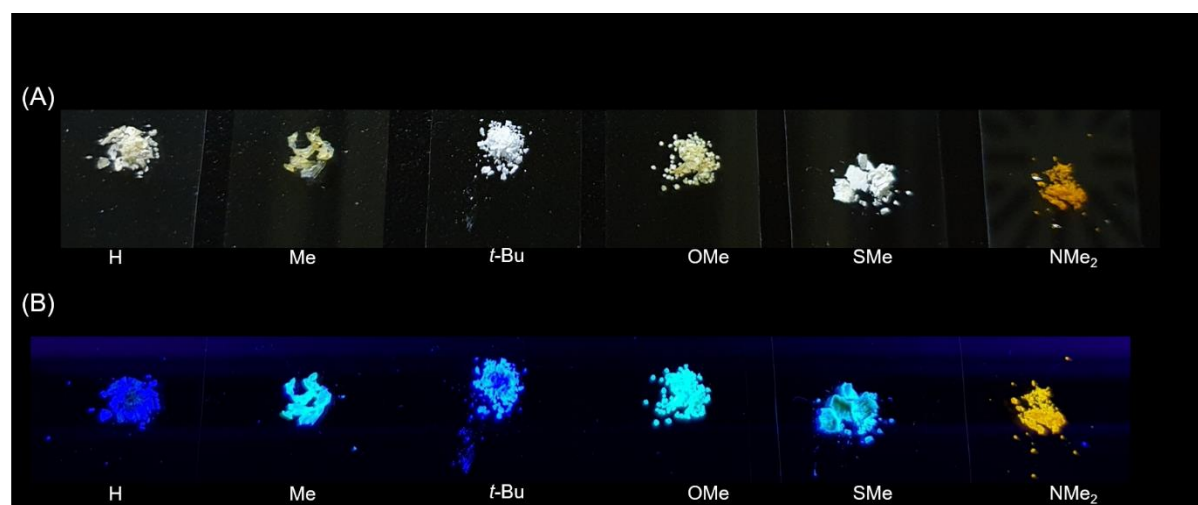

**Figure S119:** A) Photographs of the pure solid samples under normal light. B) Photographs of the pure solid samples under UV excitation (λ = 365 nm).

## Section S9: References

- (1) Dubinina, T. V.; Ivanov, A. V.; Borisova, N. E.; Trashin, S. A.; Gurskiy, S. I.; Tomilova, L. G.; Zefirov, N. S. *Inorganica Chim. Acta* **2010**, 363 (8), 1869–1878. doi:10.1016/j.ica.2010.02.011
- (2) Song, C. J.; Jang, C. K.; Yao, W.; Jaung, J. Y. *J. Chem. Res.* **2013**, 37 (5), 268–272. doi:10.3184/174751913X13642346476213
- (3) Dubinina, T. V.; Trashin, S. A.; Borisova, N. E.; Boginskaya, I. A.; Tomilova, L. G.; Zefirov, N. S. *Dye. Pigment.* **2012**, 93 (1–3), 1471–1480. doi:10.1016/j.dyepig.2011.10.012
- (4) Sheldrick, G. M. *Acta Crystallogr. Sect. A* **1990**, 46 (6), 467–473. doi:10.1107/S0108767390000277
- (5) Sheldrick, G. M. *Acta Crystallogr. Sect. A* **2008**, 64 (1), 112–122. doi:10.1107/S0108767307043930
- (6) Hübschle, C. B.; Sheldrick, G. M.; Dittrich, B. *J. Appl. Crystallogr.* **2011**, 44 (6), 1281–1284. doi:10.1107/S0021889811043202
- (7) Dolomanov, O. V.; Bourhis, L. J.; Gildea, R. J.; Howard, J. A. K.; Puschmann, H. *J. Appl. Crystallogr.* **2009**, 42 (2), 339–341. doi:10.1107/S0021889808042726
